# Supplementary material for: Treatment patterns, persistence and adherence rates in patients with type 2 diabetes mellitus in Japan: a claims-based cohort study
Source: PubMed Central journal article supplement — BMJ Open. 2019 Mar 1;9(3):e025806. doi: 10.1136/bmjopen-2018-025806 (PMC6429930; doi:10.1136/bmjopen-2018-025806), 2019-03-01
Supplement: bmjopen-2018-025806.draft_revisions.pdf [file bmjopen-2018-025806.draft_revisions.pdf]

# BMJ Open

BMJ Open is committed to open peer review. As part of this commitment we make the peer review history of every article we publish publicly available.

When an article is published we post the peer reviewers' comments and the authors' responses online. We also post the versions of the paper that were used during peer review. These are the versions that the peer review comments apply to.

The versions of the paper that follow are the versions that were submitted during the peer review process. They are not the versions of record or the final published versions. They should not be cited or distributed as the published version of this manuscript.

BMJ Open is an open access journal and the full, final, typeset and author-corrected version of record of the manuscript is available on our site with no access controls, subscription charges or pay-per-view fees (<http://bmjopen.bmj.com>).

If you have any questions on BMJ Open's open peer review process please email [info.bmjopen@bmj.com](mailto:info.bmjopen@bmj.com)

# BMJ Open

## Treatment patterns, persistence and adherence rates in patients with type 2 diabetes mellitus in Japan: a claims-based cohort study

|                               |                                                                                                                                                                                                                                                                                                                                                                                                                                                                                                                                                                                                                                                                    |
|-------------------------------|--------------------------------------------------------------------------------------------------------------------------------------------------------------------------------------------------------------------------------------------------------------------------------------------------------------------------------------------------------------------------------------------------------------------------------------------------------------------------------------------------------------------------------------------------------------------------------------------------------------------------------------------------------------------|
| Journal:                      | <i>BMJ Open</i>                                                                                                                                                                                                                                                                                                                                                                                                                                                                                                                                                                                                                                                    |
| Manuscript ID                 | bmjopen-2018-025806                                                                                                                                                                                                                                                                                                                                                                                                                                                                                                                                                                                                                                                |
| Article Type:                 | Research                                                                                                                                                                                                                                                                                                                                                                                                                                                                                                                                                                                                                                                           |
| Date Submitted by the Author: | 08-Aug-2018                                                                                                                                                                                                                                                                                                                                                                                                                                                                                                                                                                                                                                                        |
| Complete List of Authors:     | Nishimura , R; The Jikei University School of Medicine<br>kato, haruka; Takeda Pharmaceutical Company Limited,<br>Kisanuki, Koichi; Takeda Pharmaceutical Company Limited, Japan Medical<br>Affairs<br>Oh, Akinori; Takeda Pharmaceutical Company Limited, Japan Medical<br>Affairs<br>Hiroi, Shinzo ; Graduate School of Medicine and Public Health, Kyoto<br>University, Department of Pharmacoepidemiology; Takeda Pharmaceutical<br>Company, Limited, Japan Medical Affairs<br>Onishi, Yoshie; Creativ-Ceutical, Japan Operations<br>Guelfucci, Florent; Creativ-Ceutical<br>Shimasaki, Yukio; Takeda Pharmaceutical Company Limited, Japan Medical<br>Affairs |
| Keywords:                     | adherence, administrative claims-based study, antidiabetic drug therapy,<br>dipeptidyl peptidase-4 inhibitors, persistence, type 2 diabetes                                                                                                                                                                                                                                                                                                                                                                                                                                                                                                                        |
|                               |                                                                                                                                                                                                                                                                                                                                                                                                                                                                                                                                                                                                                                                                    |

SCHOLARONE™  
Manuscripts

# Treatment patterns, persistence and adherence rates in patients with type 2 diabetes mellitus in Japan: a claims-based cohort study

Rimei Nishimura *Professor*<sup>1</sup>, Haruka Kato *Medical Engagement Head*<sup>2</sup>, Koichi Kisanuki *Manager*<sup>2</sup>, Akinori Oh *Manager*<sup>2</sup>, Shinzo Hiroi *HEOR Head*<sup>2</sup>, Yoshie Onishi *DrPH-Director*<sup>3</sup>, Florent Guelfucci, *PhD -HEOR Consultant*<sup>4</sup>, Yukio Shimasaki *Medical Director*<sup>2</sup>

<sup>1</sup>The Jikei University School of Medicine, Tokyo, Japan

<sup>2</sup>Japan Medical Affairs, Takeda Pharmaceutical Company Limited, 1-1, Nihonbashihoncho, 2-chome, Chuo-ku, Tokyo 1038668, Japan

<sup>3</sup>Creativ-Ceutical, Japan Operations, 2-15-1 Konan Minato-Ku Tokyo 108-6028 Japan

<sup>4</sup>Creativ-Ceutical, 215, rue du Faubourg St-Honoré Paris 75008 – France

## Correspondence to:

Haruka Kato, Japan Medical Affairs, Takeda Pharmaceutical Company Limited, 1-1, Nihonbashihoncho, 2-chome, Chuo-ku, Tokyo 1038668, Japan

Tel: +81332421256

E-mail: [haruka.katou@takeda.com](mailto:haruka.katou@takeda.com)

## Abstract

**Objective** To determine real-world trends in antidiabetic drug use, and persistence and adherence, in Japanese patients with type 2 diabetes mellitus (T2DM).

**Design** Retrospective evaluation of administrative claims data (2011–2015) using the Japan Medical Data Center (JMDC) and Medical Data Vision (MDV) databases.

**Setting** Analysis of two administrative claims databases for Japanese patients with T2DM.

**Participants** Adults (aged  $\geq 18$  years) with an ICD-10 code of T2DM, and at least one antidiabetic drug prescription.

**Interventions** Not applicable.

**Main outcome measures** Treatment patterns in untreated (UT) or previously treated (PT) patients receiving antidiabetic therapy; persistence with treatment at 12 months; adherence (proportion of days covered [PDC]); proportions of patients with PDC  $\geq 0.8$  (adherence rate  $\geq 80\%$ ) at 12 months.

**Results** 40,908 and 90,421 patients were included from the JMDC and MDV databases, respectively. The most frequently used therapy at the index date was dipeptidyl peptidase-4 inhibitor (DPP-4i) in UT patients (JMDC: 44.0%; MDV: 54.8%) and combination therapy in PT patients (74.6%; 81.1%). Most common combinations were DPP-4i plus: biguanide (BG), sulfonylurea (SU), or BG + SU. DPP-4i was the most common add-on therapy to index BG or SU. The most common switch from an index antidiabetic drug class was to DPP-4i. 12-month persistence with index monotherapy was highest with DPP-4i and BG. 12-month persistence with index combination therapy was highest with DPP-4i plus BG. PDC was  $\geq 0.80$  for all monotherapy schedules, except insulin and glucagon-like peptide-1 agonist, and for the five most frequent 2- and 3-drug combinations. Persistence was greater in elderly UT patients and those receiving  $\leq 5$  medications, but relatively worse in UT patients with  $\geq 3$  index antidiabetic drug classes.

1  
2  
3  
4 **Conclusions** The findings confirm the key role of DPP-4i in Japanese patients with T2DM  
5 and indicate high persistence and adherence to DPP-4i-containing regimens.  
6  
7

8 **Trial registration** Not applicable.  
9  
10  
11  
12  
13  
14  
15  
16  
17  
18  
19  
20  
21  
22  
23  
24  
25  
26  
27  
28  
29  
30  
31  
32  
33  
34  
35  
36  
37  
38  
39  
40  
41  
42  
43  
44  
45  
46  
47  
48  
49  
50  
51  
52  
53  
54  
55  
56  
57  
58  
59  
60

## Strengths and limitations of this study

- This retrospective evaluation of administrative claims data (2011–2015) using the Japan Medical Data Center (JMDC) and Medical Data Vision (MDV) databases was conducted to determine real-world trends in antidiabetic drug use, and persistence and adherence, in Japanese patients with type 2 diabetes mellitus (T2DM); 40,908 and 90,421 patients were included from the JMDC and MDV databases, respectively.
- The main strengths of the study are that it provides robust real-world evidence from two large administrative claims databases for patterns of antidiabetic drug use in Japanese patients with T2DM, highlighting widespread use of DPP-4i schedules (as monotherapy, add-on therapy, switch therapy, or in combination regimens) and marked persistence and adherence with DPP-4i therapy.
- The study was limited by the observational design, by the strict inclusion criteria which restricted the number of patients eligible for analysis, and by the use of prescription events rather than patient-derived data to estimate outcomes.
- Database-specific limitations were the relative scarcity of data for patients aged  $\geq 65$  years (JMDC), the absence of information as to whether patients received care in other medical facilities (MDV), and the inability to examine reasons for treatment discontinuation and potential health benefits resulting from increased persistence (JMDC and MDV).
- Uptake of SGLT2i use may not have been accurately captured given the timing of their introduction in Japan.

## Introduction

The prevalence of diabetes mellitus continues to increase globally. In 2015, approximately 415 million people worldwide had diabetes, and this figure is projected to reach almost 650 million by 2040.<sup>1</sup> As about 20% of men and 10% of women in Japan are considered to have, or are highly likely to have, diabetes, the public health implications are enormous.<sup>2</sup>

Disease characteristics in Asian individuals with type 2 diabetes mellitus (T2DM) differ from those in Caucasian patients; Japanese patients with T2DM principally have pancreatic  $\beta$ -cell dysfunction, with less insulin resistance and adiposity than Caucasians.<sup>1</sup> Nevertheless, even in patients with mild metabolic dysfunction, T2DM has serious long-term consequences (i.e. nephropathy, neuropathy, and retinopathy) and is an important risk factor for atherosclerotic cardiovascular diseases.<sup>3,4</sup>

The benefits of early and effective intervention in T2DM are extensively acknowledged. Enhanced glycaemic control can markedly reduce micro- and macroangiopathic development and progression.<sup>4</sup> An intensified intervention to achieve lower treatment targets was shown to be significantly superior to conventional therapy for prevention of cerebrovascular events in patients with T2DM.<sup>5</sup> The Japan Diabetes Society (JDS) has developed evidence-based guidelines for management of diabetes.<sup>6</sup> Despite widespread availability of the guidelines and highly favourable conditions for access to health care in Japan, a 2-year longitudinal study using claims data identified that the quality of care for T2DM patients is often suboptimal.<sup>7</sup> Notably, screening for diabetic renal and ocular disease was less frequent than recommended in the JDS guidelines and less than half of diabetic patients were achieving the glycaemic goal (glycosylated haemoglobin [HbA1c] <7%) recommended by JDS for their circumstances.

Allied to these factors is the potential for suboptimal adherence to, and poor persistence with, treatment. Adherence is typically lower among patients with chronic conditions compared to those with acute conditions, and treatment persistence for chronic conditions is particularly low, tending to decline most dramatically within the first 6 months of treatment.<sup>8</sup> The reasons

1  
2  
3  
4 for poor adherence and persistence are complex and multifactorial, involving patient- and  
5 physician-related factors as well as treatment regimen factors such as pill burden, regimen  
6 complexity, and dosing schedule.<sup>9</sup>  
7  
8  
9

10 In Japan, it has been estimated that approximately 60% of patients with diabetes forget to  
11 take their medication at some stage.<sup>10</sup> Non-adherence to antidiabetic medications is  
12 associated with increased healthcare expenditure and higher rates of hospitalisation and  
13 death.<sup>11,12</sup> It has been suggested that use of a once-weekly dipeptidyl peptidase-4 inhibitor  
14 (DPP-4i), or a fixed-dose combination (FDC) therapy, may improve adherence in patients  
15 with T2DM.<sup>13</sup> A 10% increase in adherence has been linked with a 0.1% decrease in  
16 HbA1c.<sup>11,14</sup> Recent studies suggest that dual-therapy schedules containing a DPP-4i may  
17 improve persistence relative to DPP-4i monotherapy,<sup>15</sup> or sulfonylurea (SU)-containing  
18 schedules.<sup>16</sup>  
19  
20  
21  
22  
23  
24  
25  
26  
27

28 Contemporary meta-analyses of studies involving incretin-based treatments (i.e. DPP-4i or  
29 glucagon-like peptide-1 [GLP-1] receptor agonists) in patients with T2DM have shown that  
30 these agents are more effective in Asian than in non-Asian populations, possibly due to  
31 greater attenuation of  $\beta$ -cell dysfunction.<sup>1,17,18</sup> Moreover, the HbA1c-reducing activity of  
32 DPP-4i has been linked with fish intake, suggesting that dietary factors may also contribute to  
33 their greater efficacy in Asian patients with T2DM.<sup>1,19,20</sup>  
34  
35  
36  
37  
38  
39

40 Despite widespread recognition of the deleterious long-term consequences of poorly managed  
41 T2DM, and the proven efficacy of incretin-based therapies in Asian populations with  
42 diabetes, surprisingly little is known about actual antidiabetic drug utilisation trends and  
43 persistence and adherence patterns with antidiabetic drug therapy in patients with T2DM in  
44 Japan. In the current study, data from two large administrative claims databases were used to  
45 determine real-world trends in antidiabetic drug use, and treatment persistence and adherence  
46 rates, in patients with T2DM in Japan.  
47  
48  
49  
50  
51  
52  
53  
54  
55  
56  
57  
58  
59  
60



## Methods

### Overview

This was a real-world, retrospective evaluation of data from two administrative claims databases in Japan: the Japan Medical Data Center (JMDC) database (Japan Medical Data Center Co., Ltd; Tokyo, Japan); and the Medical Data Vision (MDV) database (Medical Data Vision Co., Ltd; Tokyo, Japan). The JMDC database contains monthly claims submitted to health insurance societies from medical institutions since January 2005 and, as at July 2017, covered up to 4 million beneficiaries (employees and their dependants). MDV is a nationwide hospital-based claims database covering nearly 19 million cumulative patients since April 2008 who, as at July 2017, had been treated as inpatients or outpatients at approximately 300 hospitals in Japan that participate in the Diagnostic Procedure Combination (DPC)/Per-Diem payment system. Both databases hold anonymised information about diagnoses, patient characteristics, drug prescriptions, medical procedures, features of medical facilities, and reimbursement costs. All patient data are encrypted before entry.

Based on Ethical Guidelines for Epidemiological Research issued by the Japanese Ministry of Health, Labour and Welfare, ethics approval and informed consent were not applicable for this study.

### Study population

Eligible patients were adults ( $\geq 18$  years) with a diagnosis of T2DM (International Classification of Diseases [ICD]-10 code: E11 or E14) and at least one prescription for an antidiabetic drug issued during the target selection period of January 2011 to December 2015.

The first prescription date for an antidiabetic drug class initiated during the selection period was the index date, and the antidiabetic drug class prescribed was designated as the index antidiabetic drug class. Only patients with a new prescription during the selection period were

1  
2  
3 included for analysis. The minimum 12-month pre-index ('look-back') period provided  
4 adequate time to observe patients' baseline characteristics and ascertain that first prescription  
5 of a given antidiabetic drug class corresponded to initiation of that drug class. The minimum  
6 12-month post-index observational period allowed adequate time for evaluation of treatment-  
7 related outcomes of interest.  
8  
9  
10  
11  
12

13  
14 Patients were excluded for the following reasons: age <18 years at the index date; <12  
15 months of continuous enrolment in the database before or after the index date; index  
16 prescription received in the 12 months before the index date; no T2DM diagnosis (ICD code  
17 E11 or E14) in the pre-index period (fig 1). The patient population was divided into two  
18 subgroups: 1) untreated (UT) patients, i.e. patients without a prescription for any antidiabetic  
19 drug class of interest during the pre-index period; and 2) previously treated (PT) patients, i.e.  
20 patients with a prescription for at least one non-index antidiabetic drug class during the pre-  
21 index period.  
22  
23  
24  
25  
26  
27  
28  
29  
30  
31  
32

### 33 **Antidiabetic drug classes of interest**

34  
35 Target antidiabetic drug classes of interest were DPP-4i, biguanides (BG), SU,  $\alpha$ -glucosidase  
36 inhibitors ( $\alpha$ -GI), thiazolidinediones (TZD), glinides, sodium-glucose cotransporter-2  
37 inhibitors (SGLT2i), insulin and GLP-1 receptor agonists and, in PT patients, the most  
38 common combination therapy schedules (consisting of combinations of these same drug  
39 classes). Data for insulin and GLP-1 receptor agonists were excluded from persistence and  
40 adherence analyses mainly because of inconsistent database information regarding the  
41 duration of therapy for these injectable drug classes.  
42  
43  
44  
45  
46  
47  
48  
49  
50  
51  
52  
53  
54  
55  
56  
57  
58  
59  
60

## Objectives

The primary objectives of the study were to describe patterns of antidiabetic drug use and persistence and adherence with antidiabetic drug classes in T2DM patients, overall and by patient subgroup (UT and PT), in the JMDC and MDV database populations.

## Outcomes

A treatment line was defined as the period during which a patient took a specific antidiabetic drug class or a combination of antidiabetic drug classes continuously, i.e. without addition of new class(es) or withdrawal/discontinuation of existing drug class(es). A treatment line-related event was defined as: an 'add-on' when a new antidiabetic drug class was prescribed in addition to existing drug class(es) for more than 21 days; as a 'switch' when at least one new antidiabetic drug class was prescribed within the grace period (defined as 1.5 times the median prescription duration for a given drug class).

Treatment persistence was defined as the time from the index date until discontinuation of at least one index antidiabetic drug class. The median time to discontinuation and the proportion of patients persistent with treatment at 12 months were reported. The date of discontinuation was defined as the date of the last prescription of the first discontinued drug in an antidiabetic drug combination, plus the days of supply of that prescription.

Adherence to an antidiabetic drug class of interest was defined as the proportion of days covered (PDC) or the period in which patients had the treatment in their possession, and was calculated according to the formula:

$$\frac{\text{Total number of prescription days covered for defined drug class of interest}}{\text{Total number of days in the follow-up period}}$$

Patients were considered adherent if a PDC of  $\geq 0.8$  (also expressed as an adherence rate of  $\geq 80\%$ ) was achieved. Adherence analyses were performed for patients with at least two

1  
2  
3  
4 prescriptions of the index antidiabetic drug class(es) during the 12-month post-index follow-  
5 up period.  
6  
7

8 The analyses reported herein focus mainly on patients who had been prescribed antidiabetic  
9 drug monotherapy, rather than those prescribed antidiabetic drug combinations, on the index  
10 date.  
11  
12  
13

### 14 15 16 17 **Statistical analyses**

18  
19  
20 Analyses were performed using SAS® version 9.3 (SAS Institute; Cary, NC, USA) and were  
21 conducted on all patients who met the inclusion criteria and were stratified into the two pre-  
22 specified patient subgroups (UT and PT) on the index date. Patient demographics, clinical  
23 characteristics, treatment-related events affecting index therapy (add-on, switch) and  
24 adherence were reported descriptively. The median time to discontinuation was calculated by  
25 antidiabetic drug class using Kaplan–Meier survival analysis, with differences between  
26 patient subgroups (UT and PT) assessed by log-rank test. The first discontinuation of the  
27 index antidiabetic drug class was the survival event and patients were censored if they  
28 reached the end of follow-up without discontinuation.  
29  
30  
31  
32  
33  
34  
35  
36  
37  
38  
39  
40

### 41 **Patient involvement**

42  
43  
44 No patients were involved in setting the research question or outcome measures, and no  
45 patients were involved in developing plans for study implementation. Furthermore, no  
46 patients were asked for advice about interpretation or writing up of results. There are no plans  
47 to distribute the research findings to study participants or the specific patient community.  
48  
49 Individual patient consent was not required for this study, as the trial was based on  
50 anonymised administrative claims data.  
51  
52  
53  
54  
55  
56  
57  
58  
59  
60

## Results

### Patient disposition

Between January 2011 and December 2015, 94,529 patients in the JMDC database and 721,366 patients in the MDV database with at least one prescription for an antidiabetic drug class of interest were identified. Of these, 40,908 patients (43.3%) in the JMDC database and 90,421 patients (8.0%) in the MDV database met the inclusion criteria and were included in the analyses (fig 1). The ratio of UT to PT patients was approximately 1:1 in the JMDC database and 1:3 in the MDV database.

### Patient characteristics

Patient demographics and clinical characteristics are presented in table 1.

Mean duration of follow-up in UT patients was 1027.1 days in the JMDC database and 1053.7 days in the MDV database. Mean age was 51.7 years and 67.6 years, respectively. There was a higher proportion of males (72.3% vs 60.8%), a lower mean number of concurrent medications (2.0 vs 3.0), and lower incidences of comorbid hypertension (47.8% vs 70.1%), hyperlipidaemia (39.8% vs 70.0%), dementia (0.2% vs 1.9%), and diabetic nephropathy (3.7% vs 18.1%) among UT patients in the JMDC database compared with the MDV database.

Among PT patients, mean duration of follow-up was 1103.8 days in the JMDC database and 1143.9 days in the MDV database. Mean age was 54.4 years and 66.9 years, respectively. There was a higher proportion of males (73.5% vs 61.2%), a lower mean number of concurrent medications (2.3 vs 3.3), and lower incidences of comorbid hypertension (58.3% vs 71.3%), hyperlipidaemia (50.0% vs 67.2%), dementia (0.2% vs 2.0%), and diabetic nephropathy (6.1% vs 15.7%) among PT patients in the JMDC database compared with the MDV database.

## Index date therapy

Irrespective of database (JMDC or MDV), treatment patterns for index antidiabetic drug classes were broadly similar for UT patients and PT patients.

In UT patients (fig 2a), the most common index therapy was DPP-4i monotherapy (JMDC: 44.0%; MDV: 54.8%), followed by BG (JMDC: 17.3%; MDV: 11.2%), insulin (JMDC: 10.2%; MDV: 8.4%) and combination therapy (JMDC: 10.7%; MDV: 9.9%). Selection of antidiabetic drug classes for combination therapy was highly varied.

In PT patients (fig 2b), the most common index therapy was combination therapy (JMDC: 74.6%; MDV: 81.1%), consisting mainly of a DPP-4i plus: BG (11.4% and 10.9%, respectively); SU (8.4% and 11.0%); BG + SU (7.8% and 9.1%);  $\alpha$ -GI (3.8% and 5.9%); or SU +  $\alpha$ -GI (2.4% and 4.6%). The next most common index therapy in PT patients was DPP-4i monotherapy (JMDC: 11.0%; MDV: 11.7%); use of the other antidiabetic drug classes as monotherapy was low.

## Changes to index therapy

In UT patients who had received a DPP-4i as the index prescription, the most frequent add-on was a BG (JMDC: 46.6%; MDV: 36.7%) or SU (JMDC: 18.9%; MDV: 23.2%). In UT patients who had received any other antidiabetic drug class as the index prescription, the most frequent add-on in all cases apart from GLP-1 receptor agonists was a DPP-4i which was added to: BG (JMDC: 67.9%; MDV: 68.6%), SU (JMDC: 57.1%; MDV: 62.9%),  $\alpha$ -GI (JMDC: 46.2%; MDV: 60.5%), TZD (JMDC: 55.9%; MDV: 53.1%), glinide (JMDC: 42.0%; MDV: 56.8%), SGLT2i (JMDC: 44.7%; MDV: 34.3%), or insulin (JMDC: 57.1%; MDV: 50.4%) (table 2).

1  
2  
3  
4 In UT patients who had received a DPP-4i as the index prescription, the most frequent  
5 treatment switch to another antidiabetic drug class was to a BG (JMDC: 32.7%; MDV:  
6 26.2%), SU (JMDC: 11.8%; MDV: 11.4%), SGLT2i (JMDC: 18.6%; MDV: 11.7%), or  
7 insulin (JMDC: 14.3%; MDV: 30.5%). In UT patients whose index prescription was for any  
8 other antidiabetic drug class, the most frequent treatment switch was to a DPP-4i: from BG  
9 (JMDC: 58.8%; MDV: 76.0%), SU (JMDC: 47.3%; MDV: 72.4%),  $\alpha$ -GI (JMDC: 57.0%;  
10 MDV: 69.2%), TZD (JMDC: 56.6%; MDV: 59.4%), glinide (JMDC: 50.0%; MDV: 51.1%),  
11 SGLT2i (JMDC: 52.0%; MDV: 30.0%), or insulin (JMDC: 34.2%; MDV: 53.7%) (table 3).

12  
13  
14  
15  
16  
17  
18  
19 In PT patients who had received a DPP-4i as the index prescription, the most frequent add-on  
20 was BG (JMDC: 30.4%; MDV: 21.6%), SU (JMDC: 24.5%; MDV: 22.8%), or insulin, but  
21 only in the MDV population (JMDC: 0.7%; MDV: 24.6%). In PT patients who had received  
22 any other antidiabetic drug class as the index prescription, the most frequent add-on was a  
23 DPP-4i to all drug classes except GLP-1 receptor agonists in the JMDC database (BU:  
24 50.3%; SU: 47.2%;  $\alpha$ -GI: 43.7%; TZD: 26.5%; glinide: 42.3%; SGLT2i: 30.2%; insulin:  
25 55.6%); and was a DPP-4i to all drug classes except  $\alpha$ -GI and GLP-1 receptor agonists in the  
26 MDV database (BU: 40.4%; SU: 55.0%; TZD: 28.3%; glinide: 36.7%; SGLT2i: 33.3%;  
27 insulin: 38.2%) (table 4).

28  
29  
30  
31  
32  
33  
34  
35  
36  
37 In PT patients whose index treatment was a DPP-4i, the most frequent treatment switch was  
38 to insulin (JMDC: 35.0%; MDV: 30.1%) or SU (JMDC: 18.5%; MDV: 25.8%). In PT  
39 patients who had received any other antidiabetic drug class as the index prescription,  
40 treatment switches varied by database. In the JMDC database, the most common treatment  
41 switch was to a DPP-4i from index therapy with a TZD (43.5%), glinide (36.8%), SGLT2i  
42 (32.0%) or insulin (31.3%), and to insulin from index therapy with a BG (40.2%), SU  
43 (32.1%),  $\alpha$ -GI (52.9%), or GLP-1 receptor agonist (25.9%). In the MDV database, the most  
44 common treatment switch was to a DPP-4i from index therapy with a BG (37.0%), SU  
45 (49.6%), TZD (41.7%), glinide (36.1%), SGLT2i (44.1%), or insulin (34.2%); and to insulin  
46 from index therapy with a GLP-1 receptor agonist (34.7%). For PT patients treated initially  
47 with  $\alpha$ -GI, switch rates were similar between DPP-4i (37.0%) and insulin (37.8%) (table 5).

### **Persistence and adherence with index monotherapy**

In both patient subgroups across both databases, the probability of remaining on treatment with index monotherapy at 12 months (not including insulin and GLP-1 receptor agonists) was highest with DPP-4i schedules (JMDC: 67.4%; MDV: 77.2%) and lowest with glinide schedules (JMDC: 38.8%; MDV: 53.8%) (table 6). This is illustrated schematically by Kaplan-Meier survival curves showing the distribution of median time to treatment discontinuation during 12 months' observation by index antidiabetic drug class for UT and PT patients in each database. Among UT patients, persistence with all antidiabetic drug classes was considerably lower in the JMDC database, particularly with glinide schedules (fig 3a), compared with the MDV database (fig 3b). Among PT patients, persistence with all antidiabetic drug classes tended to be slightly lower in the JMDC database for all antidiabetic drug classes except TZD and especially for glinide schedules (fig 3c) compared with the MDV database (fig 3d). 12-month persistence rates of approximately 50% or less were recorded in one or both patient subgroups from one or both databases for SU,  $\alpha$ -GI, TZD, and glinides (table 6).

Adherence to index antidiabetic drug classes (not including insulin and GLP-1 receptor agonists) was high in both patient subgroups across both databases, with rates ranging from 75.0% to 98.9%. In UT patients (fig 4a) and in PT patients (fig 4b), adherence rates with index antidiabetic drug classes were consistently lower in the JMDC database than in the MDV database. The lowest adherence rates were recorded with SGLT2i in UT patients (75.0%) and PT patients (77.0%) in the JMDC database.

### **Persistence and adherence with index combination therapy**

Among the five most common antidiabetic drug combinations prescribed to PT patients on the index date (i.e. a DPP-4i plus: BG, SU, BG + SU,  $\alpha$ -GI, or SU +  $\alpha$ -GI), 12-month



1  
2  
3  
4 persistence rates were highest for DPP-4i plus BG (JMDC: 53.7%; MDV: 72.0%) and lowest  
5 with DPP-4i plus SU +  $\alpha$ -GI (JMDC: 30.8%; MDV: 64.2%) (fig 5). Overall, 12-month  
6  
7 persistence rates were considerably lower in the JMDC database compared with the MDV  
8  
9 database (fig 5).  
10

11  
12 Adherence rates were  $\geq 80\%$  across all antidiabetic drug combinations in both database  
13  
14 populations, although were slightly lower in the JMDC database (86.4–91.8%) than in the  
15  
16 MDV database (96.6–98.8%).  
17

## 21 Discussion

### 24 Principal findings

25  
26  
27 This real-world evaluation of data from two administrative claims databases in Japan reveals  
28  
29 that the most common index antidiabetic drug class was DPP-4i in UT patients (44–55%) and  
30  
31 combination therapy in PT patients (~75–80%), with the latter most frequently comprising  
32  
33 dual therapy with a DPP-4i plus BG or SU.  
34

35  
36 Among patients with a change to their index antidiabetic drug therapy during follow-up: the  
37  
38 most common add-on to index DPP-4i therapy was a BG or SU; the most common add-on to  
39  
40 index BG or SU therapy was a DPP-4i; the most common switch from index DPP-4i therapy  
41  
42 was to a BG or SU; the most common switch from index drug classes other than DPP-4i  
43  
44 (except GLP-1 receptor agonists) was to a DPP-4i. Overall patterns for add-on or switch  
45  
46 therapy were similar between JMDC and MDV databases and between UT and PT patients.  
47

48  
49 Across all four patients subgroups, 12-month persistence rates were highest with index DPP-  
50  
51 4i monotherapy compared with all other index antidiabetic drug classes, although did not  
52  
53 exceed 78.8% (with DPP-4i in PT patients in the MDV database) and were around 50% or  
54  
55 less with several index antidiabetic drug classes especially in the JMDC database. Mean  
56  
57 adherence to antidiabetic monotherapy was high overall, and the proportion of adherent  
58  
59

1  
2  
3 patients (PDC  $\geq 0.80$ ) was higher with index DPP-4i than with all other antidiabetic drug  
4 classes. Among drug combinations, 12-month persistence rates were higher for DPP-4i plus  
5 BG than for other combinations, although did not exceed 72.0%. Adherence rates were  $\geq 80\%$   
6 for commonly prescribed antidiabetic drug combinations.  
7  
8  
9

10  
11 We also analysed persistence ( $\geq 12$  months,  $< 12$  months) and drug adherence ( $< 80\%$ ,  $\geq 80\%$ )  
12 in UT patients according to other patient- and treatment-related factors. Persistence tended to  
13 increase with age (supplementary table 1). In the JMDC database, the adjusted odds ratio for  
14 non-persistence was 3.31 ( $P < 0.05$ ) in the 65–74-year age group compared with the reference  
15 group (18–34 years). In addition, persistence with multiple medications tended to be good in  
16 patients receiving  $\leq 5$  medications, but poorer in patients receiving  $\geq 6$  medications. In the  
17 MDV database, 29.1% of patients with 4–5 medications were non-persistent, whereas 47.6%  
18 of patients with  $> 8$  medications were non-persistent. Persistence was good in patients with  
19 comorbid hypertension (JMDC: 66.0%; MDV: 71.4%) or hyperlipidaemia (JMDC: 62.3%;  
20 MDV: 73.6%). However, persistence was poor in patients treated with multiple antidiabetic  
21 drug classes: in both the JMDC and MDV databases, approximately 60–70% of patients  
22 receiving  $\geq 3$  index antidiabetic drug classes were non-persistent. Similar findings were  
23 evident for adherence (supplementary table 2). In the MDV database, only 2.0% of patients  
24 receiving antidiabetic monotherapy were non-adherent, whereas 6.6–9.5% of those with  $\geq 3$   
25 antidiabetic drugs were non-adherent. All these findings are interesting and suggest that  
26 higher rates of persistence and adherence observed in elderly patients treated with multiple  
27 medications may reflect greater insight into their disease among this group. Conversely, the  
28 relatively low rates of persistence and adherence evident in patients treated with more index  
29 antidiabetic drug classes may have resulted from patient or caregiver difficulties regarding  
30 drug management. Therefore, FDC therapy, with its potential to enhance persistence and  
31 adherence, may be especially appropriate for patients treated with several index oral  
32 antidiabetic drug classes.  
33  
34  
35  
36  
37  
38  
39  
40  
41  
42  
43  
44  
45  
46  
47  
48  
49  
50  
51  
52  
53  
54  
55  
56  
57  
58  
59  
60

### Strengths and limitations of the study

The main strengths of the present study are that it provides robust real-world evidence from two large administrative claims databases for patterns of antidiabetic drug use in T2DM patients in Japan, clearly highlighting the widespread use of DPP-4i schedules (as monotherapy, add-on therapy, switch therapy, or in combination regimens) and marked persistence and adherence with DPP-4i therapy.

The study was limited by the observational design, which can introduce selection bias, and by the strict inclusion criteria, which restricted the proportion of patients eligible for analysis.

The analyses did not factor in HbA1c levels at the start of treatment, or the level of HbA1c control achieved during treatment, which may have influenced the various treatment decisions. Another limitation was the use of prescription events, rather than patient-derived data (e.g. patient diaries), to estimate outcomes. A limitation specific to the JMDC database was the relative scarcity of data for patients aged  $\geq 65$  years. A limitation specific to the MDV database was the absence of information about whether patients received care in other medical facilities. For example, receipt of a prescription at another medical facility could result in a missing medication history and misclassification of the patient in our analysis. The inability to examine reasons for treatment discontinuation as these are not collected in administrative claims databases, and any potential health benefits (e.g. reduced symptom severity or improved health-related quality of life) resulting from increased persistence were limitations that applied to both databases. Lastly, the study may not have accurately captured the uptake of SGLT2i use given the timing of their introduction in Japan. Between May and October 2015, prescribing of SGLT2i was restricted to 14–28 days' therapy, which may have impacted on usage rates. Further analysis based on updated databases is required to reflect current trends in prescribing practices.

## Comparison with other studies

A recent update to a position statement from the American Diabetes Association and European Association for the Study of Diabetes regarding management of hyperglycaemia in T2DM stipulates clearly that metformin is the best therapeutic option for monotherapy.<sup>21–23</sup> If target HbA1c is not attained after approximately 3 months, progression to double therapy is advocated. If, after a further 3 months, target HbA1c remains unattained, progression to triple therapy is recommended. After a 3-month trial of triple therapy, the introduction of combination injectable therapy with insulin plus a GLP-1 receptor agonist may be indicated.

Conversely, JDS guidelines stipulate that the ‘... choice of glucose-lowering agent should be made based on the disease condition of each particular patient with consideration given to the pharmacological and safety profile of each glucose-lowering agent’.<sup>6</sup> In accordance with these recommendations, and in conjunction with appropriate patient education about diet, exercise and lifestyle, treatment of T2DM in Japan may be started with any oral hypoglycaemic agent. As illustrated in the current study, DPP-4i are widely used in Japan, and this concurs with findings from other studies. For example, the ATTAK-J study reported real-world evidence of significant hypoglycaemic activity and favourable safety for DPP-4i therapy in Japanese patients with T2DM.<sup>24</sup> The PREFERENCE 4 study documented that treatment-naïve Japanese patients preferred (in terms of treatment satisfaction) a DPP-4i to a BG, SU, or  $\alpha$ -GI.<sup>25</sup> Use of a weekly DPP-4i also improved treatment satisfaction.<sup>26,27</sup> However, these are preliminary findings, and additional real-world data from other DPP-4i studies are awaited.

A systematic review and meta-analysis of studies which compared persistence and adherence associated with two or more antidiabetic medications in patients with T2DM found considerable variation among studies in the methods used to define these terms but, nonetheless, was able to ascertain major differences between drug classes.<sup>28</sup> Adherence was better with DPP-4i than with TZD, SU, and metformin, possibly reflecting the superior tolerability and convenient dosing schedules of these incretin-based agents.

1  
2  
3  
4 Data about T2DM management in Asian patients indicate that DPP-4i are a viable first-line  
5 intervention, in a manner similar to that of metformin in Caucasian patients with T2DM.<sup>1</sup>  
6  
7 There is broad recognition that DPP-4i are more effective in Asian than non-Asian  
8 patients<sup>1,17,18,29</sup> and, in Japan, >70% of patients treated with antidiabetic drugs receive  
9 incretin-based therapies. As approximately 60% of such patients are treatment-naïve, DPP-4i  
10 are establishing a definitive role in the first-line treatment of T2DM in Japan.<sup>1,30</sup> While it is  
11 important to remain vigilant for potential safety signals,<sup>31</sup> it is worth remembering that no  
12 significant association between DPP-4i and possible pancreatic disorder was observed in  
13 several large-scale studies.<sup>24,32–34</sup>  
14  
15  
16  
17  
18  
19  
20  
21  
22  
23

## 24 **Conclusions and implications**

25  
26  
27 DPP-4i have a prevalent and pivotal role (as monotherapy, add-on therapy, switch therapy,  
28 and in combination regimens) in the management of T2DM in Japan. High persistence and  
29 adherence to DPP-4i-containing treatment schedules demonstrated in the current study were a  
30 positive finding given the multitude of factors contributing to poor adherence,<sup>9</sup> but also  
31 suggest that enhanced diabetes awareness and patient education programmes are needed to  
32 improve persistence and adherence rates overall in Japan. For antidiabetic drug therapy in  
33 general, research is warranted to quantify the extent to which augmenting persistence and  
34 adherence is likely to improve glycaemic control. In the case of DPP-4i, strategies to improve  
35 adherence might be through the use of novel once-weekly administration schedules or  
36 FDCs.<sup>13,35</sup> Overall, consistent findings from these two large administration claims databases  
37 confirm the key central role of DPP-4i in the management of Japanese patients with T2DM  
38 and indicate high persistence and adherence with DPP-4i-containing schedules, implying  
39 patient satisfaction with treatment.  
40  
41  
42  
43  
44  
45  
46  
47  
48  
49  
50  
51  
52  
53  
54  
55  
56  
57  
58  
59  
60

1  
2  
3  
4 The authors thank Ms Kerry Dechant of Content Ed Net for writing and editorial assistance in  
5 the preparation of this manuscript, with funding from Takeda Pharmaceutical Company  
6 Limited, Tokyo, Japan.  
7  
8  
9

10 The study was presented as a poster (P-039) at the 27th Annual Scientific Meeting of the  
11 Japan Epidemiological Association, Yamanashi, Japan, 25-27 January 2017.  
12  
13  
14  
15  
16  
17

### 18 **Contributors and sources:**

19  
20 RN, HK, SH, YO, FG and YS are responsible for the work described in this paper.  
21  
22

23 RN, HK, SH, YO, FG and YS were involved in the conception, design, or planning of the  
24 study.  
25  
26  
27

28 YO and FG were involved in the analysis of data.  
29  
30

31 RN, HK, KK, AO, SH and YS were involved in the interpretation of results.  
32  
33

34 RN, HK, KK, AO and YO contributed substantially to drafting of the manuscript.  
35  
36  
37  
38  
39

### 40 **Funding:**

41  
42 Funding for this research was provided by Takeda Pharmaceutical Company Limited, Tokyo,  
43 Japan.  
44  
45  
46  
47  
48  
49

### 50 **Competing interests:**

51  
52 RN has received speaker honoraria from Astellas Pharma Inc, Nippon Boehringer Ingelheim  
53 Co. Ltd, Eli Lilly Japan K.K., Kissei Pharmaceutical Co. Ltd, Medtronic Japan Co. Ltd, MSD,  
54 Novartis Pharma K.K., Novo Nordisk Pharma Ltd, Sanofi K.K., and Takeda Pharmaceutical  
55  
56  
57  
58  
59  
60

1  
2  
3  
4 Co. Ltd.; and contract research fees for collaborative research with the Japan Diabetes  
5 Foundation.  
6  
7

8 HK, KK, AO, and YS are employees of Takeda Pharmaceutical Co. Ltd.  
9

10 SH was an employee of Takeda Pharmaceutical Co. Ltd. at the time the study was conducted.  
11  
12

13  
14 FG and YO are employees of Creativ-Ceutical K.K.  
15  
16

17  
18  
19 **Data sharing:**  
20

21  
22 Given the administrative nature of the data, patients did not provide informed consent for  
23 data sharing; however, all data are fully anonymised and the risk of patient identification is  
24 low.  
25  
26  
27  
28  
29  
30

31 **Disclaimer:**  
32

33  
34 The study made use of de-identified data from the JMDC and MDV databases. The opinions,  
35 results and conclusions reported are those of the authors. No endorsement by JMDC or MDV  
36 or any of its funders or partners is intended or should be inferred.  
37  
38  
39  
40  
41  
42  
43  
44  
45  
46  
47  
48  
49  
50  
51  
52  
53  
54  
55  
56  
57  
58  
59  
60

## References

1. Seino Y, Kuwata H, Yabe D. Incretin-based drugs for type 2 diabetes: Focus on East Asian perspectives. *J Diabetes Investig* 2016;7 Suppl 1:102-9. doi: 10.1111/jdi.12490 pmid: 27186364.
2. Fujibayashi K, Hayashi M, Yokokawa H, et al. Changes in antidiabetic prescription patterns and indicators of diabetic control among 200,000 patients over 13 years at a single institution in Japan. *Diabetol Metab Syndr* 2016;8:72. doi: 10.1186/s13098-016-0187-8 pmid: 27843494.
3. Teramoto T, Sasaki J, Ishibashi S, et al. Diabetes mellitus. Executive summary of the Japan Atherosclerosis Society (JAS) guidelines for the diagnosis and prevention of atherosclerotic cardiovascular diseases in Japan—2012 version. *J Atheroscler Thromb* 2014;21(2):93-8. pmid: 24335040.
4. Araki E, Haneda M, Kasuga M, et al. New glycemic targets for patients with diabetes from the Japan Diabetes Society. *J Diabetes Investig* 2017;8(1):123-5. doi: 10.1111/jdi.12600 pmid: 27935263.
5. Ueki K, Sasako T, Okazaki Y, et al. Effect of an intensified multifactorial intervention on cardiovascular outcomes and mortality in type 2 diabetes (J-DOIT3): an open-label, randomised controlled trial. *Lancet Diabetes Endocrinol* 2017;5(12):951-64. doi: 10.1016/S2213-8587(17)30327-3 pmid: 29079252.
6. Japan Diabetes Society. Evidence-based practice guideline for the treatment for diabetes in Japan 2013. The Japan Diabetes Society: Tokyo, Japan.  
[http://www.jds.or.jp/modules/en/index.php?content\\_id=44](http://www.jds.or.jp/modules/en/index.php?content_id=44) (accessed 3 January 2018).
7. Tanaka H, Tomio J, Sugiyama T, et al. Process quality of diabetes care under favorable access to healthcare: a 2-year longitudinal study using claims data in Japan. *BMJ Open*



- 1  
2  
3  
4 *Diabetes Res Care* 2016;4(1):e000291. doi: 10.1136/bmjdr-2016-000291 pmid:  
5 27651912.  
6  
7  
8  
9 8. Osterberg L, Blaschke T. Adherence to medication. *N Engl J Med* 2005;353(5):487-97.  
10 pmid: 16079372.  
11  
12  
13 9. Brown MT, Bussell JK. Medication adherence: WHO cares? *Mayo Clin Proc*  
14 2011;86(4):304-14. doi: 10.4065/mcp.2010.0575 pmid: 21389250  
15  
16  
17 10. Sugita H, Shinohara R, Yokomichi H, et al. Effect of text messages to improve health  
18 literacy on medication adherence in patients with type 2 diabetes mellitus: A randomized  
19 controlled pilot trial. *Nagoya J Med Sci* 2017;79(3):313-21. doi:  
20 10.18999/nagjms.79.3.313 pmid: 28878436.  
21  
22  
23 11. Aoki K, Nagakura M, Taguri M, et al. Effect of switching from an anti-diabetic loose  
24 dose combination to a fixed dose combination regimen at equivalent dosage for 6 months  
25 on glycemic control in japanese patients with type 2 diabetes: a pilot study. *J Clin Med*  
26 *Res* 2017;9(8):719-24. doi: 10.14740/jocmr3067w pmid: 28725321.  
27  
28  
29 12. Fukuda H, Mizobe M. Impact of nonadherence on complication risks and healthcare costs  
30 in patients newly-diagnosed with diabetes. *Diabetes Res Clin Pract* 2017;123:55-62. doi:  
31 10.1016/j.diabres.2016.11.007 pmid: 27940390.  
32  
33  
34 13. Kaku K. First novel once-weekly DPP-4 inhibitor, trelagliptin, for the treatment of type 2  
35 diabetes mellitus. *Expert Opin Pharmacother* 2015;16(16):2539-47. doi:  
36 10.1517/14656566.2015.1099630 pmid: 26523434.  
37  
38  
39 14. Rozenfeld Y, Hunt JS, Plauschinat C, et al. Oral antidiabetic medication adherence and  
40 glycemic control in managed care. *Am J Manag Care* 2008;14(2):71-5. pmid: 18269302.  
41  
42  
43 15. Kurtyka K, Nishikino R, Ito C, et al. Adherence to dipeptidyl peptidase-4 inhibitor  
44 therapy among type 2 diabetes patients with employer-sponsored health insurance in  
45 Japan. *J Diabetes Investig* 2016;7(5):737-43. doi: 10.1111/jdi.12474 pmid: 27182033.  
46  
47  
48  
49  
50  
51  
52  
53  
54  
55  
56  
57  
58  
59  
60

- 1  
2  
3  
4 16. Bloomgarden ZT, Tunceli K, Liu J, et al. Adherence, persistence, and treatment  
5 discontinuation with sitagliptin compared with sulfonylureas as add-ons to metformin: A  
6 retrospective cohort database study. *J Diabetes* 2017;9(7):677-88. doi: 10.1111/1753-  
7 0407 pmid: 27531167.  
8  
9
- 10  
11  
12 17. Kim YG, Hahn S, Oh TJ, et al. Differences in the glucose-lowering efficacy of dipeptidyl  
13 peptidase-4 inhibitors between Asians and non-Asians: a systematic review and meta-  
14 analysis. *Diabetologia* 2013;56(4):696-708. doi: 10.1007/s00125-012-2827-3 pmid:  
15 23344728.  
16  
17
- 18  
19  
20 18. Kim YG, Hahn S, Oh TJ, et al. Differences in the HbA1c-lowering efficacy of glucagon-  
21 like peptide-1 analogues between Asians and non-Asians: a systematic review and meta-  
22 analysis. *Diabetes Obes Metab* 2014;16(10):900-9. doi: 10.1111/dom.12293 pmid:  
23 24655583.  
24  
25
- 26  
27  
28 19. Iwasaki M, Hoshian F, Tsuji T, et al. Predicting efficacy of dipeptidyl peptidase-4  
29 inhibitors in patients with type 2 diabetes: Association of glycated hemoglobin reduction  
30 with serum eicosapentaenoic acid and docosahexaenoic acid levels. *J Diabetes Investig*  
31 2012;3(5):464-7. doi: 10.1111/j.2040-1124.2012.00214.x pmid: 24843607.  
32  
33
- 34  
35  
36 20. Senmaru T, Fukui M, Kobayashi K, et al. Dipeptidyl-peptidase IV inhibitor is effective in  
37 patients with type 2 diabetes with high serum eicosapentaenoic acid concentrations. *J*  
38 *Diabetes Investig* 2012;3(6):498-502. doi: 10.1111/j.2040-1124.2012.00220.x pmid:  
39 24843614.  
40  
41
- 42  
43  
44 21. Inzucchi SE, Bergenstal RM, Buse JB, et al. Management of hyperglycemia in type 2  
45 diabetes: a patient-centered approach: position statement of the American Diabetes  
46 Association (antidiabeticA) and the European Association for the Study of Diabetes  
47 Association (EASD). *Diabetes Care* 2012;35(6):1364-79. doi: 10.2337/dc12-0413 pmid: 22517736.  
48  
49
- 50  
51  
52 22. Inzucchi SE, Bergenstal RM, Buse JB, et al. Management of hyperglycaemia in type 2  
53 diabetes: a patient-centered approach. Position statement of the American Diabetes  
54 Association (antidiabeticA) and the European Association for the Study of Diabetes  
55 Association (EASD). *Diabetes Care* 2012;35(6):1364-79. doi: 10.2337/dc12-0413 pmid: 22517736.  
56  
57
- 58  
59  
60

- 1  
2  
3 Association (antidiabeticA) and the European Association for the Study of Diabetes  
4 (EASD). *Diabetologia* 2012;55(6):1577-96. doi: 10.1007/s00125-012-2534-0 pmid:  
5 22526604.  
6  
7  
8  
9
- 10 23. Inzucchi SE, Bergenstal RM, Buse JB, et al. Management of hyperglycemia in type 2  
11 diabetes, 2015: a patient-centered approach: update to a position statement of the  
12 American Diabetes Association and the European Association for the Study of Diabetes.  
13 *Diabetes Care* 2015;38(1):140-9. doi: 10.2337/dc14-2441 pmid: 25538310.  
14  
15  
16  
17
- 18 24. Takeda H, Sasai N, Ito S, et al. Efficacy and safety of alogliptin in patients with type 2  
19 diabetes: analysis of the ATTAK-J study. *J Clin Med Res* 2016;8(2):130-40. doi:  
20 10.14740/jocmr2418w pmid: 26767082.  
21  
22  
23  
24
- 25 25. Ishii H, Hayashino Y, Akai Y, et al. Dipeptidyl peptidase-4 inhibitors as preferable oral  
26 hypoglycemic agents in terms of treatment satisfaction: Results from a multicenter, 12-  
27 week, open label, randomized controlled study in Japan (PREFERENCE 4 study). *J*  
28 *Diabetes Investig* 2017 Mar 14. doi: 10.1111/jdi.12659 pmid: 28296349. [Epub ahead of  
29 print]  
30  
31  
32  
33  
34
- 35 26. Oita M, Miyoshi H, Ono K, et al. Satisfaction and efficacy of switching from daily  
36 dipeptidyl peptidase-4 inhibitors to weekly trelagliptin in patients with type 2 diabetes -  
37 Randomized controlled study. *Endocr J* 2017 Oct 31. doi: 10.1507/endocrj.EJ17-0303  
38 pmid: 29093280. [Epub ahead of print]  
39  
40  
41  
42  
43
- 44 27. Tosaki T, Kamiya H, Yamamoto Y, et al. Efficacy and patient satisfaction of the weekly  
45 DPP-4 inhibitors trelagliptin and omarigliptin in 80 Japanese patients with type 2  
46 diabetes. *Intern Med* 2017;56(19):2563-9. doi: 10.2169/internalmedicine.8184-16 pmid:  
47 28883229.  
48  
49  
50
- 51 28. McGovern A, Tippu Z, Hinton W, et al. Comparison of medication adherence and  
52 persistence in type 2 diabetes: A systematic review and meta-analysis. *Diabetes Obes*  
53 *Metab* 2017 Nov 14. doi: 10.1111/dom.13160 pmid: 29135080 [Epub ahead of print]  
54  
55  
56  
57  
58  
59  
60

- 1  
2  
3  
4 29. Ito Y, Ambe K, Kobayashi M, et al. Ethnic difference in the pharmacodynamics-efficacy  
5 relationship of dipeptidyl peptidase-4 inhibitors between Japanese and non-Japanese  
6 patients: a systematic review. *Clin Pharmacol Ther* 2017;102(4):701-8. doi:  
7 10.1002/cpt.692 pmid: 28378919.  
8  
9  
10  
11  
12 30. Yabe D, Kuwata H, Kaneko M, et al. Use of the Japanese health insurance claims  
13 database to assess the risk of acute pancreatitis in patients with diabetes: comparison of  
14 DPP-4 inhibitors with other oral antidiabetic drugs. *Diabetes Obes Metab*  
15 2015;17(4):430-4. doi: 10.1111/dom.12381 pmid: 25146418.  
16  
17  
18  
19  
20 31. Zhang Z, Chen X, Lu P, et al. Incretin-based agents in type 2 diabetic patients at  
21 cardiovascular risk: compare the effect of GLP-1 agonists and DPP-4 inhibitors on  
22 cardiovascular and pancreatic outcomes. *Cardiovasc Diabetol* 2017;16(1):31. doi:  
23 10.1186/s12933-017-0512-z pmid: 28249585.  
24  
25  
26  
27  
28  
29 32. Scirica BM, Bhatt DL, Braunwald E, et al. Saxagliptin and cardiovascular outcomes in  
30 patients with type 2 diabetes mellitus. *N Engl J Med* 2013;369(14):1317-26. doi:  
31 10.1056/NEJMoa1307684 pmid: 23992601.  
32  
33  
34  
35 33. White WB, Cannon CP, Heller SR, et al. Alogliptin after acute coronary syndrome in  
36 patients with type 2 diabetes. *N Engl J Med* 2013;369(14):1327-35. doi:  
37 10.1056/NEJMoa1305889 pmid: 23992602.  
38  
39  
40  
41  
42 34. Egan AG, Blind E, Dunder K, et al. Pancreatic safety of incretin-based drugs--FDA and  
43 EMA assessment. *N Engl J Med* 2014;370(9):794-7. doi: 10.1056/NEJMp1314078 pmid:  
44 24571751.  
45  
46  
47  
48 35. Inagaki N, Onouchi H, Maezawa H, et al. Once-weekly trelagliptin versus daily alogliptin  
49 in Japanese patients with type 2 diabetes: a randomised, double-blind, phase 3, non-  
50 inferiority study. *Lancet Diabetes Endocrinol* 2015;3(3):191-7. doi: 10.1016/S2213-  
51 8587(14)70251-7 pmid: 25609193.  
52  
53  
54  
55  
56  
57  
58  
59  
60

## Tables

**Table 1 Patient demographics and clinical characteristics**

| Characteristics                        | UT patients               |                          | PT patients               |                          |
|----------------------------------------|---------------------------|--------------------------|---------------------------|--------------------------|
|                                        | JMDC database<br>n=19 428 | MDV database<br>n=24 820 | JMDC database<br>n=21 480 | MDV database<br>n=65 601 |
| Follow-up, days, mean (SD):            | 1027.1 (473.5)            | 1053.7 (468.9)           | 1103.8 (514.9)            | 1143.9 (518.0)           |
| Age at index date, years, mean (SD):   | 51.7 (9.9)                | 67.6 (11.8)              | 54.4 (9.2)                | 65.9 (12.0)              |
| Gender: male, n (%):                   | 14 042 (72.3)             | 15 093 (60.8)            | 15 779 (73.5)             | 40 160 (61.2)            |
| Multiple medications*, mean (SD):      | 2.0 (4.0)                 | 3.0 (2.2)                | 2.3 (3.1)                 | 3.3 (2.0)                |
| Charlson Comorbidity Index, mean (SD): | 2.2 (1.5)                 | 2.5 (2.3)                | 2.5 (1.6)                 | 2.6 (2.2)                |
| Comorbidities                          |                           |                          |                           |                          |
| Hypertension (% pts)                   | 47.8                      | 70.1                     | 58.3                      | 71.3                     |
| Hyperlipidaemia (% pts)                | 39.8                      | 70.0                     | 50.0                      | 67.2                     |
| Dementia (% pts)                       | 0.2                       | 1.9                      | 0.2                       | 2.0                      |
| Diabetic nephropathy (% pts)           | 3.7                       | 18.1                     | 6.1                       | 15.7                     |

\* Number of drugs prescribed (by 3-digit Anatomical Therapeutic Chemical Classification System)  
JMDC, Japan Medical Data Center; MDV, Medical Data Vision; PT, previously treated; pts, patients; UT, untreated.

**Table 2 Changes to index therapy: add-on treatment according to index antidiabetic drug class in UT patients, n (%)**

| <i>JMDC database</i>           |               |               |              |              |              |                |               |                |              |
|--------------------------------|---------------|---------------|--------------|--------------|--------------|----------------|---------------|----------------|--------------|
| <b>Index treatment</b>         | <b>DPP-4i</b> | <b>BG</b>     | <b>SU</b>    | <b>α-GI</b>  | <b>TZD</b>   | <b>Glinide</b> | <b>SGLT2i</b> | <b>Insulin</b> | <b>GLP-1</b> |
| <b>Pts with add-on therapy</b> | <b>n=2839</b> | <b>n=1102</b> | <b>n=364</b> | <b>n=316</b> | <b>n=102</b> | <b>n=50</b>    | <b>n=76</b>   | <b>n=7</b>     | <b>n=8</b>   |
| + DPP-4i                       | NA            | 748 (67.9)    | 208 (57.1)   | 146 (46.2)   | 57 (55.9)    | 21 (42.0)      | 34 (44.7)     | 4 (57.1)       | 1 (12.5)     |
| + BG                           | 1324 (46.6)   | NA            | 80 (22.0)    | 85 (26.9)    | 21 (20.6)    | 9 (18.0)       | 28 (36.8)     | 2 (28.6)       | 1 (12.5)     |
| + SU                           | 537 (18.9)    | 66 (6.0)      | NA           | 30 (9.5)     | 8 (7.8)      | 1 (2.0)        | 5 (6.6)       | 0 (0.0)        | 2 (25.0)     |
| + α-GI                         | 255 (9.0)     | 40 (3.6)      | 25 (6.9)     | NA           | 4 (3.9)      | 15 (30.0)      | 5 (6.6)       | 0 (0.0)        | 0 (0.0)      |
| + TZD                          | 293 (10.3)    | 58 (5.3)      | 20 (5.5)     | 16 (5.1)     | NA           | 1 (2.0)        | 1 (1.3)       | 0 (0.0)        | 2 (25.0)     |
| + Glinide                      | 79 (2.8)      | 16 (1.5)      | 0 (0.0)      | 17 (5.4)     | 0 (0.0)      | NA             | 0 (0.0)       | 1 (14.3)       | 0 (0.0)      |
| + SGLT2i                       | 256 (9.0)     | 128 (11.6)    | 11 (3.0)     | 2 (0.6)      | 7 (6.9)      | 2 (4.0)        | NA            | 0 (0.0)        | 2 (25.0)     |
| + Insulin                      | 5 (0.2)       | 2 (0.2)       | 1 (0.3)      | 1 (0.3)      | 0 (0.0)      | 0 (0.0)        | 0 (0.0)       | NA             | 0 (0.0)      |
| + GLP-1                        | 0 (0.0)       | 16 (1.5)      | 2 (0.5)      | 2 (0.6)      | 0 (0.0)      | 0 (0.0)        | 0 (0.0)       | 0 (0.0)        | NA           |
| <i>MDV database</i>            |               |               |              |              |              |                |               |                |              |
| <b>Index treatment</b>         | <b>DPP-4i</b> | <b>BG</b>     | <b>SU</b>    | <b>α-GI</b>  | <b>TZD</b>   | <b>Glinide</b> | <b>SGLT2i</b> | <b>Insulin</b> | <b>GLP-1</b> |
| <b>Pts with add-on therapy</b> | <b>n=3179</b> | <b>n=878</b>  | <b>n=342</b> | <b>n=344</b> | <b>n=81</b>  | <b>n=74</b>    | <b>n=35</b>   | <b>n=24</b>    | <b>n=12</b>  |
| + DPP-4i                       | NA            | 602 (68.6)    | 215 (62.9)   | 208 (60.5)   | 43 (53.1)    | 42 (56.8)      | 12 (34.3)     | 113 (50.4)     | 0 (0.0)      |
| + BG                           | 1168 (36.7)   | NA            | 51 (14.9)    | 36 (10.5)    | 14 (17.3)    | 7 (9.5)        | 12 (34.3)     | 26 (11.6)      | 4 (33.3)     |
| + SU                           | 736 (23.2)    | 44 (5.0)      | NA           | 36 (10.5)    | 3 (3.7)      | 1 (1.4)        | 4 (11.4)      | 10 (4.5)       | 4 (33.3)     |
| + α-GI                         | 414 (13.0)    | 38 (4.3)      | 29 (8.5)     | NA           | 6 (7.4)      | 15 (20.3)      | 0 (0.0)       | 28 (12.5)      | 1 (8.3)      |
| + TZD                          | 168 (5.3)     | 29 (3.3)      | 13 (3.8)     | 4 (1.2)      | NA           | 4 (5.4)        | 0 (0.0)       | 1 (0.4)        | 0 (0.0)      |
| + Glinide                      | 189 (5.9)     | 9 (1.0)       | 0 (0.0)      | 26 (7.6)     | 2 (2.5)      | NA             | 0 (0.0)       | 12 (5.4)       | 0 (0.0)      |
| + SGLT2i                       | 190 (6.0)     | 94 (10.7)     | 7 (2.0)      | 5 (1.5)      | 8 (9.9)      | 0 (0.0)        | NA            | 2 (0.9)        | 3 (25.0)     |

1  
2  
3  
4  
5  
6  
7  
8  
9  
10  
11  
12  
13  
14  
15  
16  
17  
18  
19  
20  
21  
22  
23  
24  
25  
26  
27  
28  
29  
30  
31  
32  
33  
34  
35  
36  
37  
38  
39  
40  
41  
42  
43  
44  
45  
46  
47

|           |           |          |          |          |         |         |          |         |         |
|-----------|-----------|----------|----------|----------|---------|---------|----------|---------|---------|
| + Insulin | 239 (7.5) | 35 (4.0) | 14 (4.1) | 19 (5.5) | 1 (1.2) | 3 (4.1) | 1 (2.9)  | NA      | 0 (0.0) |
| + GLP-1   | 2 (0.1)   | 10 (1.1) | 4 (1.2)  | 1 (0.3)  | 0 (0.0) | 1 (1.4) | 4 (11.4) | 0 (0.0) | NA      |

‘+’ indicates add-on therapy with new antidiabetic drug class.

$\alpha$ -GI,  $\alpha$ -glucosidase inhibitor; DPP-4i, dipeptidyl peptidase-4 inhibitor; GLP-1, glucagon-like peptide-1; JMDC, Japan Medical Data Center; MDV, Medical Data Vision; NA, not applicable; pts, patients; SGLT2i, sodium-glucose cotransporter-2 inhibitor; TZD, thiazolidinedione; UT, untreated.

For peer review only

**Table 3 Changes to index therapy: switch treatment according to index antidiabetic drug class in PT patients, n (%)**

| <i>JMDC database</i>    |            |            |            |              |           |           |           |            |          |
|-------------------------|------------|------------|------------|--------------|-----------|-----------|-----------|------------|----------|
| Index treatment         | DPP-4i     | BG         | SU         | $\alpha$ -GI | TZD       | Glinide   | SGLT2i    | Insulin    | GLP-1    |
| Pts with switch therapy | n=440      | n=267      | n=224      | n=221        | n=76      | n=44      | n=50      | n=336      | n=6      |
| → DPP-4i                | NA         | 157 (58.8) | 106 (47.3) | 126 (57.0)   | 43 (56.6) | 22 (50.0) | 26 (52.0) | 115 (34.2) | 1 (16.7) |
| → BG                    | 144 (32.7) | NA         | 47 (21.0)  | 40 (18.1)    | 15 (19.7) | 8 (18.2)  | 13 (26.0) | 107 (31.8) | 1 (16.7) |
| → SU                    | 52 (11.8)  | 12 (4.5)   | NA         | 4 (1.8)      | 0 (0.0)   | 3 (6.8)   | 1 (2.0)   | 11 (3.3)   | 1 (16.7) |
| → $\alpha$ -GI          | 20 (4.5)   | 12 (4.5)   | 4 (1.8)    | NA           | 2 (2.6)   | 2 (4.5)   | 2 (4.0)   | 19 (5.7)   | 0 (0.0)  |
| → TZD                   | 26 (5.9)   | 19 (7.1)   | 8 (3.6)    | 11 (5.0)     | NA        | 0 (0.0)   | 0 (0.0)   | 5 (1.5)    | 0 (0.0)  |
| → Glinide               | 22 (5.0)   | 3 (1.1)    | 5 (2.2)    | 11 (5.0)     | 0 (0.0)   | NA        | 0 (0.0)   | 11 (3.3)   | 0 (0.0)  |
| → SGLT2i                | 82 (18.6)  | 26 (9.7)   | 3 (1.3)    | 10 (4.5)     | 7 (9.2)   | 3 (6.8)   | NA        | 2 (0.6)    | 1 (16.7) |
| → Insulin               | 63 (14.3)  | 17 (6.4)   | 36 (16.1)  | 8 (3.6)      | 5 (6.6)   | 4 (9.1)   | 2 (4.0)   | NA         | 2 (33.3) |
| → GLP-1                 | 7 (1.6)    | 3 (1.1)    | 0 (0.0)    | 0 (0.0)      | 1 (1.3)   | 0 (0.0)   | 0 (0.0)   | 6 (1.8)    | NA       |
| <i>MDV database</i>     |            |            |            |              |           |           |           |            |          |
| Index treatment         | DPP-4i     | BG         | SU         | $\alpha$ -GI | TZD       | Glinide   | SGLT2i    | Insulin    | GLP-1    |
| Pts with switch therapy | n=446      | n=271      | n=199      | n=224        | n=69      | n=47      | n=20      | n=417      | n=11     |
| → DPP-4i                | NA         | 206 (76.0) | 144 (72.4) | 155 (69.2)   | 41 (59.4) | 24 (51.1) | 6 (30.0)  | 224 (53.7) | 5 (45.5) |
| → BG                    | 117 (26.2) | NA         | 15 (7.5)   | 21 (9.4)     | 14 (20.3) | 4 (8.5)   | 6 (30.0)  | 34 (8.2)   | 2 (18.2) |
| → SU                    | 51 (11.4)  | 12 (4.4)   | NA         | 15 (6.7)     | 4 (5.8)   | 4 (8.5)   | 2 (10.0)  | 25 (6.0)   | 0 (0.0)  |
| → $\alpha$ -GI          | 38 (8.5)   | 7 (2.6)    | 1 (0.5)    | NA           | 1 (1.4)   | 7 (14.9)  | 0 (0.0)   | 26 (6.2)   | 0 (0.0)  |
| → TZD                   | 18 (4.0)   | 9 (3.3)    | 0 (0.0)    | 4 (1.8)      | NA        | 0 (0.0)   | 0 (0.0)   | 7 (1.7)    | 0 (0.0)  |
| → Glinide               | 14 (3.1)   | 4 (1.5)    | 5 (2.5)    | 10 (4.5)     | 0 (0.0)   | NA        | 0 (0.0)   | 30 (7.2)   | 0 (0.0)  |
| → SGLT2i                | 52 (11.7)  | 14 (5.2)   | 2 (1.0)    | 1 (0.4)      | 3 (4.3)   | 0 (0.0)   | NA        | 2 (0.5)    | 2 (18.2) |



1  
2  
3  
4  
5  
6  
7  
8  
9  
10  
11  
12  
13  
14  
15  
16  
17  
18  
19  
20  
21  
22  
23  
24  
25  
26  
27  
28  
29  
30  
31  
32  
33  
34  
35  
36  
37  
38  
39  
40  
41  
42  
43  
44  
45  
46  
47

|                 |            |          |           |          |         |          |          |         |         |
|-----------------|------------|----------|-----------|----------|---------|----------|----------|---------|---------|
| → Insulin       | 136 (30.5) | 10 (3.7) | 21 (10.6) | 15 (6.7) | 4 (5.8) | 6 (12.8) | 0 (0.0)  | NA      | 1 (9.1) |
| → GLP-1 agonist | 11 (2.5)   | 4 (1.5)  | 1 (0.5)   | 0 (0.0)  | 0 (0.0) | 0 (0.0)  | 2 (10.0) | 9 (2.2) | NA      |

‘→’ indicates treatment switch to new antidiabetic drug class.

α-GI, α-glucosidase inhibitor; DPP-4i, dipeptidyl peptidase-4 inhibitor; GLP-1, glucagon-like peptide-1; JMDC, Japan Medical Data Center; MDV, Medical Data Vision; NA, not applicable; pts, patients; SGLT2i, sodium-glucose cotransporter-2 inhibitor; TZD, thiazolidinedione; UT, untreated.

For peer review only

**Table 4 Changes to index therapy: add-on treatment according to index antidiabetic drug class in PT patients, n (%)**

| <i>JMDC database</i>           |               |              |              |              |             |                |               |                |              |
|--------------------------------|---------------|--------------|--------------|--------------|-------------|----------------|---------------|----------------|--------------|
| <b>Index treatment</b>         | <b>DPP-4i</b> | <b>BG</b>    | <b>SU</b>    | <b>α-GI</b>  | <b>TZD</b>  | <b>Glinide</b> | <b>SGLT2i</b> | <b>Insulin</b> | <b>GLP-1</b> |
| <b>Pts with add-on therapy</b> | <b>n=1141</b> | <b>n=370</b> | <b>n=163</b> | <b>n=119</b> | <b>n=68</b> | <b>n=71</b>    | <b>n=129</b>  | <b>n=9</b>     | <b>n=53</b>  |
| + DPP-4i                       | NA            | 186 (50.3)   | 77 (47.2)    | 52 (43.7)    | 18 (26.5)   | 30 (42.3)      | 39 (30.2)     | 5 (55.6)       | 0 (0.0)      |
| + BG                           | 347 (30.4)    | NA           | 23 (14.1)    | 14 (11.8)    | 11 (16.2)   | 12 (16.9)      | 19 (14.7)     | 0 (0.0)        | 12 (22.6)    |
| + SU                           | 279 (24.5)    | 27 (7.3)     | NA           | 12 (10.1)    | 9 (13.2)    | 1 (1.4)        | 5 (3.9)       | 2 (22.2)       | 15 (28.3)    |
| + α-GI                         | 172 (15.1)    | 21 (5.7)     | 13 (8.0)     | NA           | 2 (2.9)     | 10 (14.1)      | 2 (1.6)       | 1 (11.1)       | 3 (5.7)      |
| + TZD                          | 120 (10.5)    | 13 (3.5)     | 12 (7.4)     | 1 (0.8)      | NA          | 0 (0.0)        | 4 (3.1)       | 0 (0.0)        | 1 (1.9)      |
| + Glinide                      | 43 (3.8)      | 8 (2.2)      | 1 (0.6)      | 6 (5.0)      | 1 (1.5)     | NA             | 0 (0.0)       | 1 (11.1)       | 0 (0.0)      |
| + SGLT2i                       | 46 (4.0)      | 24 (6.5)     | 3 (1.8)      | 2 (1.7)      | 0 (0.0)     | 2 (2.8)        | NA            | 0 (0.0)        | 2 (3.8)      |
| + Insulin                      | 8 (0.7)       | 3 (0.8)      | 0 (0.0)      | 1 (0.8)      | 0 (0.0)     | 0 (0.0)        | 0 (0.0)       | NA             | 0 (0.0)      |
| + GLP-1 agonist                | 3 (0.3)       | 16 (4.3)     | 7 (4.3)      | 3 (2.5)      | 2 (2.9)     | 0 (0.0)        | 3 (2.3)       | 0 (0.0)        | NA           |
| <i>MDV database</i>            |               |              |              |              |             |                |               |                |              |
| <b>Index treatment</b>         | <b>DPP-4i</b> | <b>BG</b>    | <b>SU</b>    | <b>α-GI</b>  | <b>TZD</b>  | <b>Glinide</b> | <b>SGLT2i</b> | <b>Insulin</b> | <b>GLP-1</b> |
| <b>Pts with add-on therapy</b> | <b>n=3362</b> | <b>n=616</b> | <b>n=322</b> | <b>n=211</b> | <b>n=53</b> | <b>n=180</b>   | <b>n=114</b>  | <b>n=335</b>   | <b>n=140</b> |
| + DPP-4i                       | NA            | 249 (40.4)   | 177 (55.0)   | 63 (29.9)    | 15 (28.3)   | 66 (36.7)      | 38 (33.3)     | 128 (38.2)     | 1 (0.7)      |
| + BG                           | 727 (21.6)    | NA           | 31 (9.6)     | 8 (3.8)      | 7 (13.2)    | 16 (8.9)       | 23 (20.2)     | 35 (10.4)      | 18 (12.9)    |
| + SU                           | 768 (22.8)    | 38 (6.2)     | NA           | 11 (5.2)     | 6 (11.3)    | 1 (0.6)        | 4 (3.5)       | 12 (3.6)       | 61 (43.6)    |
| + α-GI                         | 444 (13.2)    | 28 (4.5)     | 20 (6.2)     | NA           | 1 (1.9)     | 25 (13.9)      | 3 (2.6)       | 28 (8.4)       | 11 (7.9)     |
| + TZD                          | 131 (3.9)     | 15 (2.4)     | 9 (2.8)      | 3 (1.4)      | NA          | 3 (1.7)        | 1 (0.9)       | 5 (1.5)        | 1 (0.7)      |
| + Glinide                      | 216 (6.4)     | 10 (1.6)     | 1 (0.3)      | 9 (4.3)      | 0 (0.0)     | NA             | 0 (0.0)       | 10 (3.0)       | 5 (3.6)      |
| + SGLT2i                       | 59 (1.8)      | 29 (4.7)     | 4 (1.2)      | 2 (0.9)      | 3 (5.7)     | 2 (1.1)        | NA            | 6 (1.8)        | 3 (2.1)      |

1  
2  
3  
4  
5  
6  
7  
8  
9  
10  
11  
12  
13  
14  
15  
16  
17  
18  
19  
20  
21  
22  
23  
24  
25  
26  
27  
28  
29  
30  
31  
32  
33  
34  
35  
36  
37  
38  
39  
40  
41  
42  
43  
44  
45  
46  
47

|                 |            |            |           |           |           |           |         |          |           |
|-----------------|------------|------------|-----------|-----------|-----------|-----------|---------|----------|-----------|
| + Insulin       | 828 (24.6) | 163 (26.5) | 37 (11.5) | 80 (37.9) | 14 (26.4) | 45 (25.0) | 7 (6.1) | NA       | 22 (15.7) |
| + GLP-1 agonist | 1 (0.0)    | 24 (3.9)   | 16 (5.0)  | 3 (1.4)   | 2 (3.8)   | 2 (1.1)   | 6 (5.3) | 12 (3.6) | NA        |

‘+’ indicates add-on therapy with new antidiabetic drug class.

$\alpha$ -GI,  $\alpha$ -glucosidase inhibitor; DPP-4i, dipeptidyl peptidase-4 inhibitor; GLP-1, glucagon-like peptide-1; JMDC, Japan Medical Data Center; MDV, Medical Data Vision; NA, not applicable; PT, previously treated; pts, patients; SGLT2i, sodium-glucose cotransporter-2 inhibitor; TZD, thiazolidinedione.

For peer review only

**Table 5 Changes to index therapy: switch treatment according to index antidiabetic drug class in PT patients, n (%)**

| <i>JMDC database</i>           |               |              |              |              |             |                |               |                |              |
|--------------------------------|---------------|--------------|--------------|--------------|-------------|----------------|---------------|----------------|--------------|
| <b>Index treatment</b>         | <b>DPP-4i</b> | <b>BG</b>    | <b>SU</b>    | <b>α-GI</b>  | <b>TZD</b>  | <b>Glinide</b> | <b>SGLT2i</b> | <b>Insulin</b> | <b>GLP-1</b> |
| <b>Pts with switch therapy</b> | <b>n=303</b>  | <b>n=92</b>  | <b>n=56</b>  | <b>n=70</b>  | <b>n=46</b> | <b>n=38</b>    | <b>n=50</b>   | <b>n=268</b>   | <b>n=27</b>  |
| → DPP-4i                       | NA            | 27 (29.3)    | 15 (26.8)    | 14 (20.0)    | 20 (43.5)   | 14 (36.8)      | 16 (32.0)     | 84 (31.3)      | 4 (14.8)     |
| → BG                           | 44 (14.5)     | NA           | 8 (14.3)     | 8 (11.4)     | 8 (17.4)    | 2 (5.3)        | 6 (12.0)      | 48 (17.9)      | 6 (22.2)     |
| → SU                           | 56 (18.5)     | 8 (8.7)      | NA           | 3 (4.3)      | 5 (10.9)    | 5 (13.2)       | 2 (4.0)       | 27 (10.1)      | 5 (18.5)     |
| → α-GI                         | 15 (5.0)      | 2 (2.2)      | 1 (1.8)      | NA           | 1 (2.2)     | 3 (7.9)        | 1 (2.0)       | 17 (6.3)       | 2 (7.4)      |
| → TZD                          | 14 (4.6)      | 8 (8.7)      | 1 (1.8)      | 1 (1.4)      | NA          | 2 (5.3)        | 4 (8.0)       | 6 (2.2)        | 1 (3.7)      |
| → Glinide                      | 12 (4.0)      | 2 (2.2)      | 4 (7.1)      | 1 (1.4)      | 0 (0.0)     | NA             | 1 (2.0)       | 7 (2.6)        | 0 (0.0)      |
| → SGLT2i                       | 17 (5.6)      | 2 (2.2)      | 1 (1.8)      | 0 (0.0)      | 0 (0.0)     | 0 (0.0)        | NA            | 1 (0.4)        | 1 (3.7)      |
| → Insulin                      | 106 (35.0)    | 37 (40.2)    | 18 (32.1)    | 37 (52.9)    | 6 (13.0)    | 6 (15.8)       | 9 (18.0)      | NA             | 7 (25.9)     |
| → GLP-1                        | 8 (2.6)       | 1 (1.1)      | 0 (0.0)      | 0 (0.0)      | 1 (2.2)     | 0 (0.0)        | 2 (4.0)       | 9 (3.4)        | NA           |
| <i>MDV database</i>            |               |              |              |              |             |                |               |                |              |
| <b>Index treatment</b>         | <b>DPP-4i</b> | <b>BG</b>    | <b>SU</b>    | <b>α-GI</b>  | <b>TZD</b>  | <b>Glinide</b> | <b>SGLT2i</b> | <b>Insulin</b> | <b>GLP-1</b> |
| <b>Pts with switch therapy</b> | <b>n=651</b>  | <b>n=154</b> | <b>n=135</b> | <b>n=119</b> | <b>n=36</b> | <b>n=119</b>   | <b>n=34</b>   | <b>n=480</b>   | <b>n=75</b>  |
| → DPP-4i                       | NA            | 57 (37.0)    | 67 (49.6)    | 44 (37.0)    | 15 (41.7)   | 43 (36.1)      | 15 (44.1)     | 164 (34.2)     | 19 (25.3)    |
| → BG                           | 66 (10.1)     | NA           | 7 (5.2)      | 6 (5.0)      | 4 (11.1)    | 3 (2.5)        | 6 (17.6)      | 19 (4.0)       | 5 (6.7)      |
| → SU                           | 168 (25.8)    | 13 (8.4)     | NA           | 6 (5.0)      | 4 (11.1)    | 22 (18.5)      | 1 (2.9)       | 48 (10.0)      | 4 (5.3)      |
| → α-GI                         | 66 (10.1)     | 7 (4.5)      | 3 (2.2)      | NA           | 1 (2.8)     | 9 (7.6)        | 0 (0.0)       | 18 (3.8)       | 2 (2.7)      |
| → TZD                          | 26 (4.0)      | 11 (7.1)     | 2 (1.5)      | 3 (2.5)      | NA          | 0 (0.0)        | 1 (2.9)       | 10 (2.1)       | 2 (2.7)      |
| → Glinide                      | 48 (7.4)      | 3 (1.9)      | 8 (5.9)      | 2 (1.7)      | 0 (0.0)     | NA             | 0 (0.0)       | 32 (6.7)       | 2 (2.7)      |
| → SGLT2i                       | 16 (2.5)      | 3 (1.9)      | 2 (1.5)      | 2 (1.7)      | 1 (2.8)     | 0 (0.0)        | NA            | 2 (0.4)        | 0 (0.0)      |

1  
2  
3  
4  
5  
6  
7  
8  
9  
10  
11  
12  
13  
14  
15  
16  
17  
18  
19  
20  
21  
22  
23  
24  
25  
26  
27  
28  
29  
30  
31  
32  
33  
34  
35  
36  
37  
38  
39  
40  
41  
42  
43  
44  
45  
46  
47

|                 |            |           |           |           |           |           |         |         |           |
|-----------------|------------|-----------|-----------|-----------|-----------|-----------|---------|---------|-----------|
| → Insulin       | 196 (30.1) | 48 (31.2) | 32 (23.7) | 45 (37.8) | 10 (27.8) | 27 (22.7) | 1 (2.9) | NA      | 26 (34.7) |
| → GLP-1 agonist | 18 (2.8)   | 1 (0.6)   | 0 (0.0)   | 1 (0.8)   | 0 (0.0)   | 1 (0.8)   | 3 (8.8) | 3 (0.6) | NA        |

‘→’ indicates treatment switch to new antidiabetic drug.  
 DPP-4i, dipeptidyl peptidase-4 inhibitor;  $\alpha$ -GI,  $\alpha$ -glucosidase inhibitor; GLP-1, glucagon-like peptide-1; JMDC, Japan Medical Data Center; MDV, Medical Data Vision; NA, not applicable; PT, previously treated; pts, patients; SGLT2i, sodium-glucose cotransporter-2 inhibitor; TZD, thiazolidinedione.

For peer review only

**Table 6 Persistence with monotherapy schedules of index antidiabetic drug classes*****UT patients***

| <b>Index therapy</b>                  | <b>DPP-4i</b>   | <b>BG</b>     | <b>SU</b>     | <b><math>\alpha</math>-GI</b> | <b>TZD</b>   | <b>Glinide</b> | <b>SGLT2i</b> |
|---------------------------------------|-----------------|---------------|---------------|-------------------------------|--------------|----------------|---------------|
| <b>JMDC database</b>                  | <b>n=8545</b>   | <b>n=3354</b> | <b>n=979</b>  | <b>n=1346</b>                 | <b>n=504</b> | <b>n=165</b>   | <b>n=430</b>  |
| Median time to discontinuation (days) | 1138.0          | 582.0         | 384.0         | 280.0                         | 400.0        | 161.0          | 471.0         |
| 12-month persistence rate (% pts)     | 67.4            | 57.3          | 50.4          | 45.5                          | 51.2         | 38.8           | 53.5          |
| <b>MDV database</b>                   | <b>n=13 598</b> | <b>n=2777</b> | <b>n=1174</b> | <b>n=1666</b>                 | <b>n=449</b> | <b>n=292</b>   | <b>n=224</b>  |
| Median time to discontinuation (days) | 707.0           | 672.0         | 474.5         | 458.0                         | 491.0        | 438.5          | 537.5         |
| 12-month persistence rate (% pts)     | 77.2            | 73.8          | 56.0          | 54.9                          | 57.2         | 53.8           | 63.4          |

***PT patients***

| <b>Index therapy</b>                  | <b>DPP-4i</b> | <b>BG</b>     | <b>SU</b>    | <b><math>\alpha</math>-GI</b> | <b>TZD</b>   | <b>Glinide</b> | <b>SGLT2i</b> |
|---------------------------------------|---------------|---------------|--------------|-------------------------------|--------------|----------------|---------------|
| <b>JMDC database</b>                  | <b>n=2354</b> | <b>n=680</b>  | <b>n=284</b> | <b>n=256</b>                  | <b>n=158</b> | <b>n=135</b>   | <b>n=285</b>  |
| Median time to discontinuation (days) | 1583.0        | 917.0         | 599.0        | 304.5                         | 370.0        | 266.0          | 691.0         |
| 12-month persistence rate (% pts)     | 73.5          | 69.3          | 58.1         | 46.9                          | 50.0         | 43.0           | 62.8          |
| <b>MDV database</b>                   | <b>n=7658</b> | <b>n=1100</b> | <b>n=633</b> | <b>n=495</b>                  | <b>n=133</b> | <b>n=446</b>   | <b>n=229</b>  |
| Median time to discontinuation (days) | 764.0         | 666.5         | 532.0        | 422.0                         | 333.0        | 396.0          | 553.0         |
| 12-month persistence rate (% pts)     | 78.8          | 73.6          | 62.2         | 52.7                          | 48.1         | 52.2           | 66.4          |

$\alpha$ -GI,  $\alpha$ -glucosidase inhibitor; DPP-4i, dipeptidyl peptidase-4 inhibitor; GLP-1, glucagon-like peptide-1; JMDC, Japan Medical Data Center; MDV,

1  
2  
3  
4  
5  
6  
7  
8  
9  
10  
11  
12  
13  
14  
15  
16  
17  
18  
19  
20  
21  
22  
23  
24  
25  
26  
27  
28  
29  
30  
31  
32  
33  
34  
35  
36  
37  
38  
39  
40  
41  
42  
43  
44  
45  
46  
47

---

Medical Data Vision; PT, previously treated; pts, patients; SGLT2i , sodium-glucose cotransporter-2 inhibitor; TZD, thiazolidinedione; UT, untreated.

---

For peer review only

## Figure legends

### Fig 1 Patient disposition.

JMDC, Japan Medical Data Center; MDV, Medical Data Vision; T2DM, type 2 diabetes mellitus.

### Fig 2 Antidiabetic drug classes prescribed at the index date in (a) UT patients; and (b) PT patients in the JMDC and MDV databases.

$\alpha$ -GI,  $\alpha$ -glucosidase inhibitor; BG, biguanide; DPP-4i, dipeptidyl peptidase-4 inhibitor; GLP-1, glucagon-like peptide-1; JMDC, Japan Medical Data Center; MDV, Medical Data Vision; PT, previously treated; pts, patients; SGLT2i, sodium-glucose cotransporter-2; SU, sulfonylurea; TZD, thiazolidinedione; UT, untreated.

### Fig 3 Kaplan-Meier survival distribution of median time to treatment discontinuation according to index antidiabetic drug class; (a) UT patients; JMDC database; (b) UT patients, MDV database; (c) PT patients, JMDC database; (d) PT patients, MDV database.

$\alpha$ -GI,  $\alpha$ -glucosidase inhibitor; BG, biguanide; DPP-4i, dipeptidyl peptidase-4 inhibitor; JMDC, Japan Medical Data Center; MDV, Medical Data Vision; PT, previously treated; SGLT2i, sodium-glucose cotransporter-2 inhibitor; SU, sulfonylurea; TZD, thiazolidinedione; UT, untreated.

### Fig 4 12-month adherence to index antidiabetic drug classes in (a) untreated (UT) patients and (b) previously treated (PT) patients in the JMDC and MDV databases.

DPP-4i, dipeptidyl peptidase-4 inhibitor; GLP-1, glucagon-like peptide-1; JMDC, Japan Medical Data Center; MDV, Medical Data Vision; PT, previously treated; pts, patients; SGLT2i, sodium-glucose cotransporter-2; TZD, thiazolidinedione; UT, untreated.



1  
2  
3  
4  
5  
6  
7 **Fig 5** 12-month persistence rates with the five most frequent antidiabetic drug combinations  
8 in PT patients in the JMDC and MDV databases.  
9

10  $\alpha$ -GI,  $\alpha$ -glucosidase inhibitor; BG, biguanide; DPP-4i, dipeptidyl peptidase-4 inhibitor;  
11 JMDC, Japan Medical Data Center; MDV, Medical Data Vision; PT, previously treated; SU,  
12 sulfonylurea.  
13  
14  
15  
16  
17  
18  
19  
20  
21  
22  
23  
24  
25  
26  
27  
28  
29  
30  
31  
32  
33  
34  
35  
36  
37  
38  
39  
40  
41  
42  
43  
44  
45  
46  
47  
48  
49  
50  
51  
52  
53  
54  
55  
56  
57  
58  
59  
60

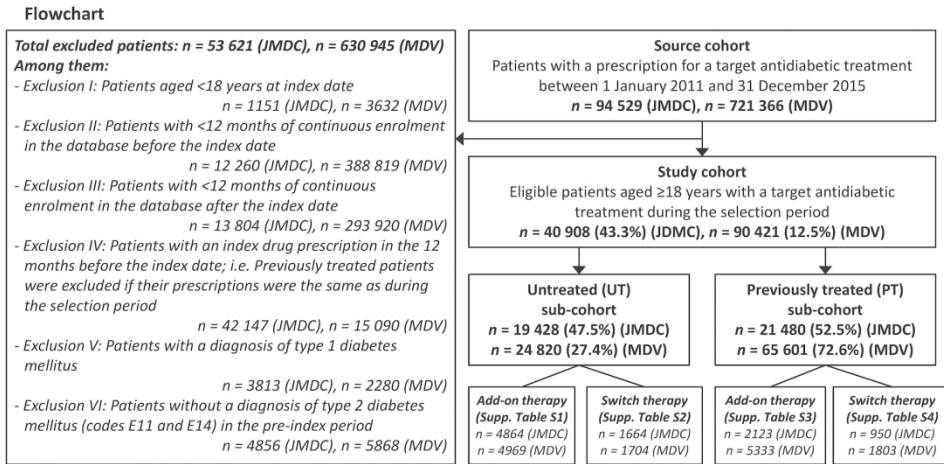

Figure 1

173x90mm (300 x 300 DPI)

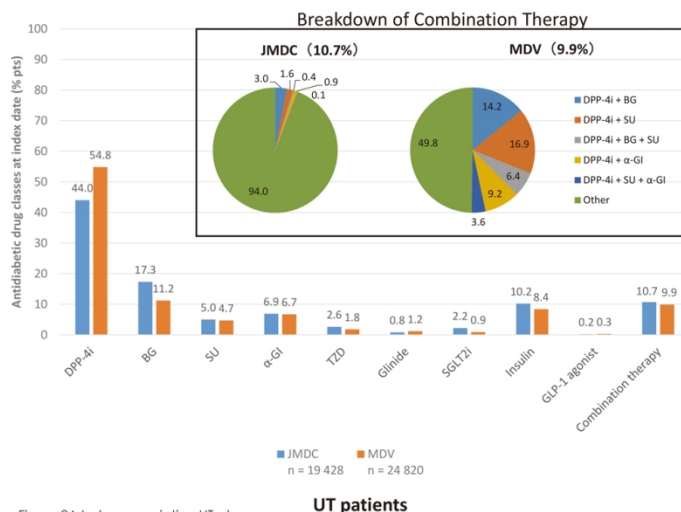

Figure 2A Index prescription UT pts

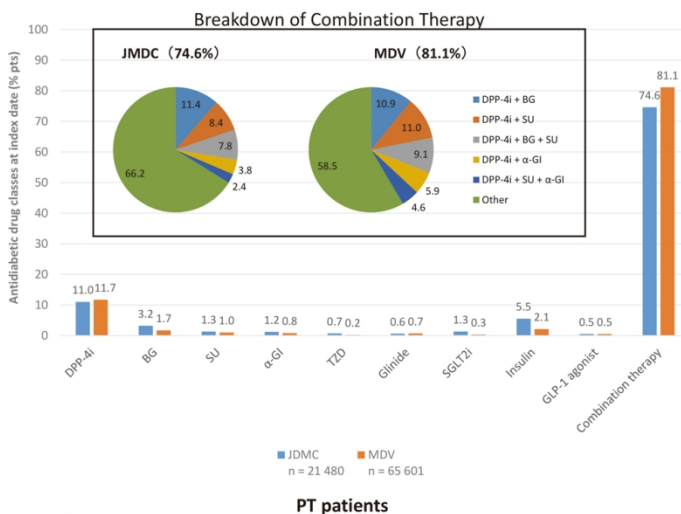

Figure 2B Index prescription PT pts

90x148mm (300 x 300 DPI)

1  
2  
3  
4  
5  
6  
7  
8  
9  
10  
11  
12  
13  
14  
15  
16  
17  
18  
19  
20  
21  
22  
23  
24  
25  
26  
27  
28  
29  
30  
31  
32  
33  
34  
35  
36  
37  
38  
39  
40  
41  
42  
43  
44  
45  
46  
47  
48  
49  
50  
51  
52  
53  
54  
55  
56  
57  
58  
59  
60

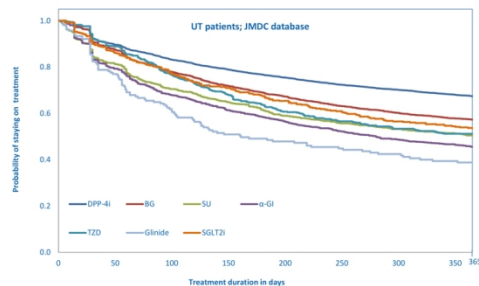

Figure 3A Survival analysis UT\_JMDC

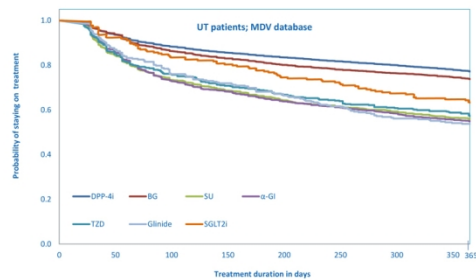

Figure 3B Survival analysis UT\_MDV

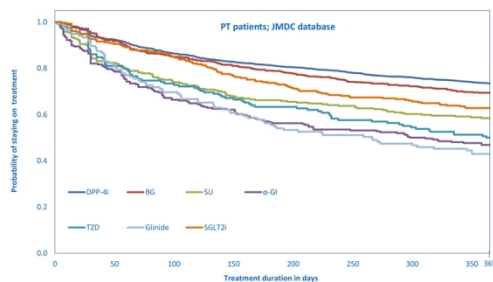

Figure 3C Survival analysis PT\_JMDC

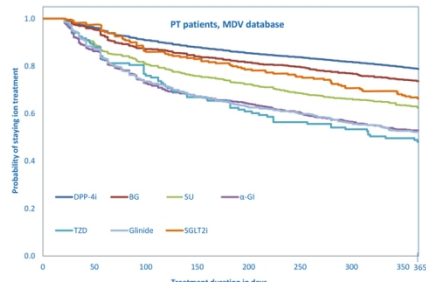

Figure 3D Survival analysis PT\_MDV

135x90mm (300 x 300 DPI)

1  
2  
3  
4  
5  
6  
7  
8  
9  
10  
11  
12  
13  
14  
15  
16  
17  
18  
19  
20  
21  
22  
23  
24  
25  
26  
27  
28  
29  
30  
31  
32  
33  
34  
35  
36  
37  
38  
39  
40  
41  
42  
43  
44  
45  
46  
47  
48  
49  
50  
51  
52  
53  
54  
55  
56  
57  
58  
59  
60

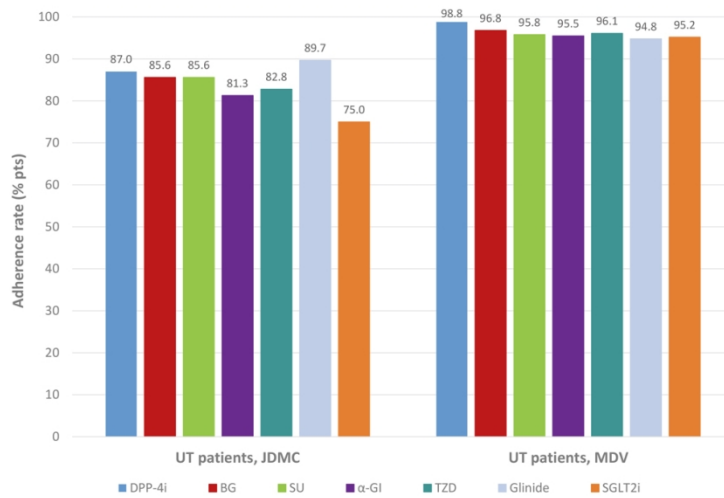

Figure 4A Adherence UT pts

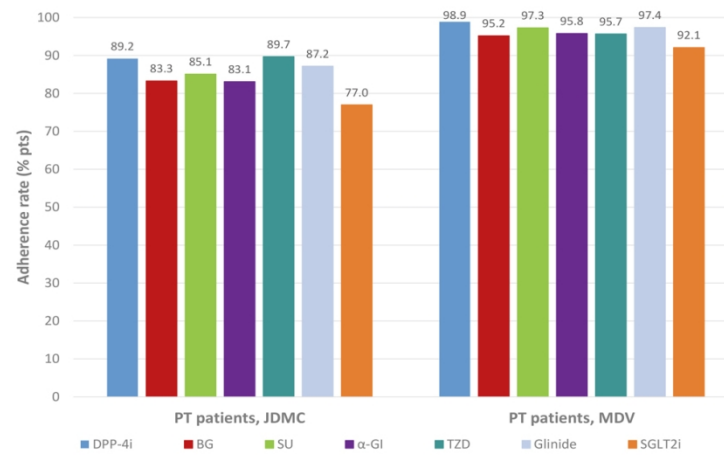

Figure 4B Adherence PT pts

90x140mm (300 x 300 DPI)

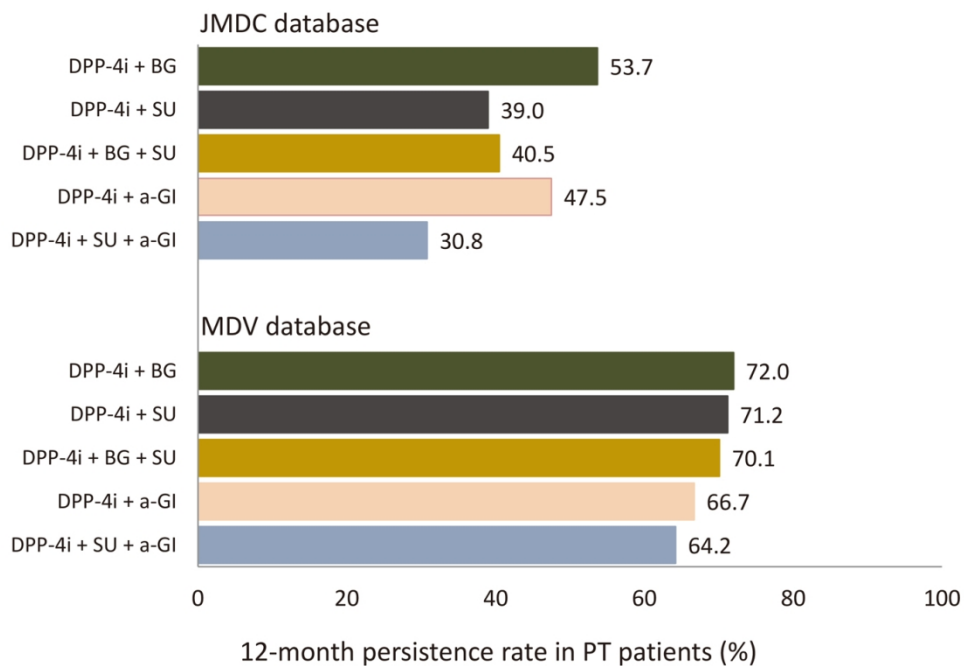

Figure 5

121x90mm (300 x 300 DPI)

**Supplementary table 1 Factors associated with non-persistence with the index antidiabetic drug class in untreated patients**

| Characteristics                                           | <i>JMDC database</i> |                        |                                           | <i>MDV database</i> |                        |                                           |
|-----------------------------------------------------------|----------------------|------------------------|-------------------------------------------|---------------------|------------------------|-------------------------------------------|
|                                                           | N                    | Not persistent (% pts) | Adjusted odds ratio (95% CI) <sup>a</sup> | N                   | Not persistent (% pts) | Adjusted odds ratio (95% CI) <sup>a</sup> |
| <b>Age at index date (years):</b>                         |                      |                        |                                           |                     |                        |                                           |
| 18–34                                                     | 659                  | 66.9                   | 1.00                                      | 205                 | 38.0                   | 1.00                                      |
| 35–44                                                     | 2734                 | 53.1                   | 1.64 (1.37, 1.97)*                        | 791                 | 29.5                   | 1.34 (0.96, 1.86)                         |
| 45–54                                                     | 6356                 | 41.3                   | 2.45 (2.06, 2.92)*                        | 2016                | 26.7                   | 1.48 (1.09, 2.02)*                        |
| 55–64                                                     | 5891                 | 34.8                   | 3.04 (2.55, 3.62)*                        | 4872                | 26.3                   | 1.55 (1.15, 2.09)*                        |
| 65–74                                                     | 1777                 | 31.5                   | 3.31 (2.72, 4.03)*                        | 7880                | 29.3                   | 1.39 (1.03, 1.87)*                        |
| ≥ 75                                                      | 34                   | 35.3                   | 2.52 (1.21, 5.25)*                        | 6602                | 33.8                   | 1.22 (0.90, 1.64)                         |
| <b>Number of medications:</b>                             |                      |                        |                                           |                     |                        |                                           |
| 0                                                         | 7585                 | 46.1                   | 1.00                                      | 2957                | 34.2                   | 1.00                                      |
| 1–3                                                       | 6980                 | 37.9                   | 1.21 (1.13, 1.30)*                        | 10,907              | 26.7                   | 1.38 (1.26, 1.51)*                        |
| 4–5                                                       | 1594                 | 33.4                   | 1.30 (1.15, 1.46)*                        | 5707                | 29.1                   | 1.31 (1.18, 1.45)*                        |
| 6–8                                                       | 883                  | 35.2                   | 1.23 (1.05, 1.43)*                        | 2528                | 37.9                   | 1.04 (0.92, 1.17)                         |
| > 8                                                       | 409                  | 38.4                   | 1.11 (0.89, 1.37)*                        | 267                 | 47.6                   | 0.73 (0.56, 0.95)*                        |
| <b>Hypertension:</b>                                      |                      |                        |                                           |                     |                        |                                           |
| No                                                        | 9053                 | 47.3                   | 1.00                                      | 6534                | 32.8                   | 1.00                                      |
| Yes                                                       | 8398                 | 34.0                   | 1.43 (1.33, 1.52)*                        | 15,832              | 28.6                   | 1.17 (1.09, 1.25)*                        |
| <b>Hyperlipidaemia:</b>                                   |                      |                        |                                           |                     |                        |                                           |
| No                                                        | 10,335               | 43.2                   | 1.00                                      | 8535                | 35.3                   | 1.00                                      |
| Yes                                                       | 7116                 | 37.7                   | 1.12 (1.05, 1.20)*                        | 13,831              | 26.4                   | 1.40 (1.31, 1.49)*                        |
| <b>Number of antidiabetic drug classes at index date:</b> |                      |                        |                                           |                     |                        |                                           |
| 1                                                         | 15,368               | 39.1                   | 1.00                                      | 20,180              | 27.2                   | 1.00                                      |
| 2                                                         | 1707                 | 52.7                   | 0.62 (0.56, 0.69)*                        | 1594                | 51.8                   | 0.37 (0.33, 0.41)*                        |

|     |     |      |                    |     |      |                    |
|-----|-----|------|--------------------|-----|------|--------------------|
| 3   | 299 | 60.2 | 0.44 (0.35, 0.56)* | 489 | 59.5 | 0.27 (0.22, 0.32)* |
| ≥ 4 | 77  | 68.8 | 0.31 (0.19, 0.50)* | 103 | 59.2 | 0.25 (0.16, 0.37)* |

<sup>a</sup> Adjusted for age, gender, multiple medications at index date, comorbidities at baseline, and number of antidiabetic drug classes at index date.

\* p < 0.05.

CI, confidence interval; JMDC, Japan Medical Data Center; MDV, Medical Data Vision; pts, patients.

For peer review only



**Supplementary table 2 Factors associated with non-adherence with the index antidiabetic drug class in untreated patients**

| Characteristics                                           | <i>JMDC database</i> |                      |                                           | <i>MDV database</i> |                      |                                           |
|-----------------------------------------------------------|----------------------|----------------------|-------------------------------------------|---------------------|----------------------|-------------------------------------------|
|                                                           | N                    | Not adherent (% pts) | Adjusted odds ratio (95% CI) <sup>a</sup> | N                   | Not adherent (% pts) | Adjusted odds ratio (95% CI) <sup>a</sup> |
| <b>Age at index date (years):</b>                         |                      |                      |                                           |                     |                      |                                           |
| 18–34                                                     | 599                  | 16.7                 | 1.00                                      | 190                 | 7.4                  | 1.00                                      |
| 35–44                                                     | 2571                 | 14.0                 | 1.23 (0.97, 1.57)                         | 727                 | 4.8                  | 1.40 (0.73, 2.69)                         |
| 45–54                                                     | 6056                 | 11.4                 | 1.54 (1.22, 1.94)*                        | 1893                | 2.1                  | 3.06 (1.61, 5.81)*                        |
| 55–64                                                     | 5638                 | 8.8                  | 2.05 (1.61, 2.61)*                        | 4555                | 2.0                  | 3.18 (1.75, 5.80)*                        |
| 65–74                                                     | 1694                 | 4.6                  | 3.83 (2.78, 5.27)*                        | 7341                | 2.0                  | 3.30 (1.83, 5.95)*                        |
| ≥ 75                                                      | 32                   | 6.3                  | 2.39 (0.63, 9.02)                         | 6225                | 2.7                  | 2.67 (1.47, 4.86)*                        |
| <b>Number of medications:</b>                             |                      |                      |                                           |                     |                      |                                           |
| 0                                                         | 7186                 | 10.0                 | 1.00                                      | 2713                | 2.3                  | 1.00                                      |
| 1–3                                                       | 6661                 | 10.9                 | 0.86 (0.77, 0.97)*                        | 10,178              | 1.9                  | 1.03 (0.78, 1.39)                         |
| 4–5                                                       | 1515                 | 10.4                 | 0.82 (0.68, 0.99)*                        | 5373                | 2.4                  | 0.80 (0.58, 1.12)                         |
| 6–8                                                       | 840                  | 10.1                 | 0.83 (0.65, 1.06)                         | 2410                | 3.8                  | 0.61 (0.43, 0.87)                         |
| > 8                                                       | 388                  | 10.8                 | 0.72 (0.51, 1.00)                         | 257                 | 6.2                  | 0.38 (0.21, 0.70)                         |
| <b>Hypertension:</b>                                      |                      |                      |                                           |                     |                      |                                           |
| No                                                        | 8528                 | 11.0                 | 1.00                                      | 6060                | 2.9                  | 1.00                                      |
| Yes                                                       | 8062                 | 9.8                  | 1.05 (0.95, 1.18)                         | 14,871              | 2.2                  | 1.26 (1.03, 1.54)*                        |
| <b>Hyperlipidaemia:</b>                                   |                      |                      |                                           |                     |                      |                                           |
| No                                                        | 9800                 | 10.5                 | 1.00                                      | 7959                | 3.1                  | 1.00                                      |
| Yes                                                       | 6790                 | 10.3                 | 1.01 (0.91, 1.12)                         | 12,972              | 1.9                  | 1.52 (1.26, 1.84)*                        |
| <b>Number of antidiabetic drug classes at index date:</b> |                      |                      |                                           |                     |                      |                                           |
| 1                                                         | 14,507               | 10.5                 | 1.00                                      | 18,892              | 2.0                  | 1.00                                      |
| 2                                                         | 1707                 | 9.8                  | 1.14 (0.96, 1.35)                         | 1492                | 4.6                  | 0.50 (0.38, 0.65)*                        |
| 3                                                         | 299                  | 8.7                  | 1.36 (0.91, 2.05)                         | 452                 | 6.6                  | 0.33 (0.22, 0.49)*                        |

1  
2  
3

|          |    |      |                   |    |     |                    |
|----------|----|------|-------------------|----|-----|--------------------|
| $\geq 4$ | 77 | 11.7 | 0.92 (0.46, 1.87) | 95 | 9.5 | 0.21 (0.10, 0.42)* |
|----------|----|------|-------------------|----|-----|--------------------|

---

4<sup>a</sup> Adjusted for age, gender, multiple medications at index date, comorbidities at baseline, and number of  
5 antidiabetic drug classes at index date.

6  
7 \*  $p < 0.05$ .

8 CI, confidence interval; JMDC, Japan Medical Data Center; MDV, Medical Data Vision; pts, patients.  
9

---

10  
11  
12  
13  
14  
15  
16  
17  
18  
19  
20  
21  
22  
23  
24  
25  
26  
27  
28  
29  
30  
31  
32  
33  
34  
35  
36  
37  
38  
39  
40  
41  
42  
43  
44  
45  
46  
47  
48  
49  
50  
51  
52  
53  
54  
55  
56  
57  
58  
59  
60

For peer review only

## STROBE (Strengthening The Reporting of OBServational Studies in Epidemiology) Checklist

A checklist of items that should be included in reports of observational studies. You must report the page number in your manuscript where you consider each of the items listed in this checklist. If you have not included this information, either revise your manuscript accordingly before submitting or note N/A.

**Note:** An Explanation and Elaboration article discusses each checklist item and gives methodological background and published examples of transparent reporting. The STROBE checklist is best used in conjunction with this article (freely available on the Web sites of PLoS Medicine at <http://www.plosmedicine.org/>, Annals of Internal Medicine at <http://www.annals.org/>, and Epidemiology at <http://www.epidem.com/>). Information on the STROBE Initiative is available at [www.strobe-statement.org](http://www.strobe-statement.org).

| Section and Item     | Item No. | Recommendation                                                                                                                                                                                                                                                                                                                                                                                                                                                                 | Reported on Page No. |
|----------------------|----------|--------------------------------------------------------------------------------------------------------------------------------------------------------------------------------------------------------------------------------------------------------------------------------------------------------------------------------------------------------------------------------------------------------------------------------------------------------------------------------|----------------------|
| Title and Abstract   | 1        | (a) Indicate the study's design with a commonly used term in the title or the abstract                                                                                                                                                                                                                                                                                                                                                                                         |                      |
|                      |          | (b) Provide in the abstract an informative and balanced summary of what was done and what was found                                                                                                                                                                                                                                                                                                                                                                            |                      |
| <b>Introduction</b>  |          |                                                                                                                                                                                                                                                                                                                                                                                                                                                                                |                      |
| Background/Rationale | 2        | Explain the scientific background and rationale for the investigation being reported                                                                                                                                                                                                                                                                                                                                                                                           |                      |
| Objectives           | 3        | State specific objectives, including any prespecified hypotheses                                                                                                                                                                                                                                                                                                                                                                                                               |                      |
| <b>Methods</b>       |          |                                                                                                                                                                                                                                                                                                                                                                                                                                                                                |                      |
| Study Design         | 4        | Present key elements of study design early in the paper                                                                                                                                                                                                                                                                                                                                                                                                                        |                      |
| Setting              | 5        | Describe the setting, locations, and relevant dates, including periods of recruitment, exposure, follow-up, and data collection                                                                                                                                                                                                                                                                                                                                                |                      |
| Participants         | 6        | (a) <i>Cohort study</i> —Give the eligibility criteria, and the sources and methods of selection of participants. Describe methods of follow-up<br><br><i>Case-control study</i> —Give the eligibility criteria, and the sources and methods of case ascertainment and control selection. Give the rationale for the choice of cases and controls<br><br><i>Cross-sectional study</i> —Give the eligibility criteria, and the sources and methods of selection of participants |                      |
|                      |          | (b) <i>Cohort study</i> —For matched studies, give matching criteria and number of exposed and unexposed<br><br><i>Case-control study</i> —For matched studies, give matching criteria and the number of controls per case                                                                                                                                                                                                                                                     |                      |
| Variables            | 7        | Clearly define all outcomes, exposures, predictors, potential confounders, and effect modifiers. Give diagnostic criteria, if applicable                                                                                                                                                                                                                                                                                                                                       |                      |

| Section and Item             | Item No. | Recommendation                                                                                                                                                                                                                                                                                            | Reported on Page No. |
|------------------------------|----------|-----------------------------------------------------------------------------------------------------------------------------------------------------------------------------------------------------------------------------------------------------------------------------------------------------------|----------------------|
| Data Sources/<br>Measurement | 8*       | For each variable of interest, give sources of data and details of methods of assessment (measurement). Describe comparability of assessment methods if there is more than one group                                                                                                                      |                      |
| Bias                         | 9        | Describe any efforts to address potential sources of bias                                                                                                                                                                                                                                                 |                      |
| Study Size                   | 10       | Explain how the study size was arrived at                                                                                                                                                                                                                                                                 |                      |
| Quantitative Variables       | 11       | Explain how quantitative variables were handled in the analyses. If applicable, describe which groupings were chosen and why                                                                                                                                                                              |                      |
| Statistical Methods          | 12       | (a) Describe all statistical methods, including those used to control for confounding                                                                                                                                                                                                                     |                      |
|                              |          | (b) Describe any methods used to examine subgroups and interactions                                                                                                                                                                                                                                       |                      |
|                              |          | (c) Explain how missing data were addressed                                                                                                                                                                                                                                                               |                      |
|                              |          | (d) <i>Cohort study</i> —If applicable, explain how loss to follow-up was addressed<br><i>Case-control study</i> —If applicable, explain how matching of cases and controls was addressed<br><i>Cross-sectional study</i> —If applicable, describe analytical methods taking account of sampling strategy |                      |
|                              |          | (e) Describe any sensitivity analyses                                                                                                                                                                                                                                                                     |                      |
| <b>Results</b>               |          |                                                                                                                                                                                                                                                                                                           |                      |
| Participants                 | 13*      | (a) Report numbers of individuals at each stage of study—eg numbers potentially eligible, examined for eligibility, confirmed eligible, included in the study, completing follow-up, and analysed                                                                                                         |                      |
|                              |          | (b) Give reasons for non-participation at each stage                                                                                                                                                                                                                                                      |                      |
|                              |          | (c) Consider use of a flow diagram                                                                                                                                                                                                                                                                        |                      |
| Descriptive Data             | 14*      | (a) Give characteristics of study participants (eg demographic, clinical, social) and information on exposures and potential confounders                                                                                                                                                                  |                      |
|                              |          | (b) Indicate number of participants with missing data for each variable of interest                                                                                                                                                                                                                       |                      |
|                              |          | (c) <i>Cohort study</i> —Summarise follow-up time (eg, average and total amount)                                                                                                                                                                                                                          |                      |
| Outcome Data                 | 15*      | <i>Cohort study</i> —Report numbers of outcome events or summary measures over time                                                                                                                                                                                                                       |                      |
|                              |          | <i>Case-control study</i> —Report numbers in each exposure category, or summary measures of exposure                                                                                                                                                                                                      |                      |
|                              |          | <i>Cross-sectional study</i> —Report numbers of outcome events or summary measures                                                                                                                                                                                                                        |                      |

| Section and Item         | Item No. | Recommendation                                                                                                                                                                                               | Reported on Page No. |
|--------------------------|----------|--------------------------------------------------------------------------------------------------------------------------------------------------------------------------------------------------------------|----------------------|
| Main Results             | 16       | (a) Give unadjusted estimates and, if applicable, confounder-adjusted estimates and their precision (eg, 95% confidence interval). Make clear which confounders were adjusted for and why they were included |                      |
|                          |          | (b) Report category boundaries when continuous variables were categorized                                                                                                                                    |                      |
|                          |          | (c) If relevant, consider translating estimates of relative risk into absolute risk for a meaningful time period                                                                                             |                      |
| Other Analyses           | 17       | Report other analyses done—eg analyses of subgroups and interactions, and sensitivity analyses                                                                                                               |                      |
| <b>Discussion</b>        |          |                                                                                                                                                                                                              |                      |
| Key Results              | 18       | Summarise key results with reference to study objectives                                                                                                                                                     |                      |
| Limitations              | 19       | Discuss limitations of the study, taking into account sources of potential bias or imprecision. Discuss both direction and magnitude of any potential bias                                                   |                      |
| Interpretation           | 20       | Give a cautious overall interpretation of results considering objectives, limitations, multiplicity of analyses, results from similar studies, and other relevant evidence                                   |                      |
| Generalisability         | 21       | Discuss the generalisability (external validity) of the study results                                                                                                                                        |                      |
| <b>Other Information</b> |          |                                                                                                                                                                                                              |                      |
| Funding                  | 22       | Give the source of funding and the role of the funders for the present study and, if applicable, for the original study on which the present article is based                                                |                      |

\*Give information separately for cases and controls in case-control studies and, if applicable, for exposed and unexposed groups in cohort and cross-sectional studies.

**Once you have completed this checklist, please save a copy and upload it as part of your submission. DO NOT include this checklist as part of the main manuscript document. It must be uploaded as a separate file.**

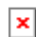

**Treatment patterns, persistence and adherence rates in patients with type 2 diabetes mellitus in Japan: a claims-based cohort study**

|                                 |                                                                                                                                                                                                                                                                                                                                                                                                                                                                                                                                                                                                                                                                    |
|---------------------------------|--------------------------------------------------------------------------------------------------------------------------------------------------------------------------------------------------------------------------------------------------------------------------------------------------------------------------------------------------------------------------------------------------------------------------------------------------------------------------------------------------------------------------------------------------------------------------------------------------------------------------------------------------------------------|
| Journal:                        | <i>BMJ Open</i>                                                                                                                                                                                                                                                                                                                                                                                                                                                                                                                                                                                                                                                    |
| Manuscript ID                   | bmjopen-2018-025806.R1                                                                                                                                                                                                                                                                                                                                                                                                                                                                                                                                                                                                                                             |
| Article Type:                   | Research                                                                                                                                                                                                                                                                                                                                                                                                                                                                                                                                                                                                                                                           |
| Date Submitted by the Author:   | 09-Oct-2018                                                                                                                                                                                                                                                                                                                                                                                                                                                                                                                                                                                                                                                        |
| Complete List of Authors:       | Nishimura , R; The Jikei University School of Medicine<br>kato, haruka; Takeda Pharmaceutical Company Limited,<br>Kisanuki, Koichi; Takeda Pharmaceutical Company Limited, Japan<br>Medical Affairs<br>Oh, Akinori; Takeda Pharmaceutical Company Limited, Japan Medical<br>Affairs<br>Hiroi, Shinzo ; Graduate School of Medicine and Public Health, Kyoto<br>University, Department of Pharmacoepidemiology; Takeda<br>Pharmaceutical Company, Limited, Japan Medical Affairs<br>Onishi, Yoshie; Creativ-Ceutical, Japan Operations<br>Guelfucci, Florent; Creativ-Ceutical<br>Shimasaki, Yukio; Takeda Pharmaceutical Company Limited, Japan<br>Medical Affairs |
| <b>Primary Subject Heading</b>: | Diabetes and endocrinology                                                                                                                                                                                                                                                                                                                                                                                                                                                                                                                                                                                                                                         |
| Secondary Subject Heading:      | Epidemiology                                                                                                                                                                                                                                                                                                                                                                                                                                                                                                                                                                                                                                                       |
| Keywords:                       | adherence, administrative claims-based study, antidiabetic drug therapy, dipeptidyl peptidase-4 inhibitors, persistence, type 2 diabetes                                                                                                                                                                                                                                                                                                                                                                                                                                                                                                                           |
|                                 |                                                                                                                                                                                                                                                                                                                                                                                                                                                                                                                                                                                                                                                                    |

SCHOLARONE™  
Manuscripts

# Treatment patterns, persistence and adherence rates in patients with type 2 diabetes mellitus in Japan: a claims-based cohort study

Rimei Nishimura *Professor*<sup>1</sup>, Haruka Kato *Medical Engagement Head*<sup>2</sup>, Koichi Kisanuki *Manager*<sup>2</sup>, Akinori Oh *Manager*<sup>2</sup>, Shinzo Hiroi *HEOR Head*<sup>2</sup>, Yoshie Onishi *DrPH-Director*<sup>3</sup>, Florent Guelfucci, *PhD -HEOR Consultant*<sup>4</sup>, Yukio Shimasaki *Medical Director*<sup>2</sup>

<sup>1</sup>The Jikei University School of Medicine, Tokyo, Japan

<sup>2</sup>Japan Medical Affairs, Takeda Pharmaceutical Company Limited, 1-1, Nihonbashihoncho, 2-chome, Chuo-ku, Tokyo 1038668, Japan

<sup>3</sup>Creativ-Ceutical, Japan Operations, 2-15-1 Konan Minato-Ku Tokyo 108-6028 Japan

<sup>4</sup>Creativ-Ceutical, 215, rue du Faubourg St-Honoré Paris 75008 – France

## Correspondence to:

Haruka Kato, Japan Medical Affairs, Takeda Pharmaceutical Company Limited, 1-1, Nihonbashihoncho, 2-chome, Chuo-ku, Tokyo 1038668, Japan

Tel: +81332421256

E-mail: [haruka.katou@takeda.com](mailto:haruka.katou@takeda.com)

## Abstract

**Objective** To determine real-world trends in antidiabetic drug use, and persistence and adherence, in Japanese patients with type 2 diabetes mellitus (T2DM).

**Design** Retrospective evaluation of administrative claims data (2011–2015) using the Japan Medical Data Center (JMDC) and Medical Data Vision (MDV) databases.

**Setting** Analysis of two administrative claims databases for Japanese patients with T2DM.

**Participants** Adults (aged  $\geq 18$  years) with an ICD-10 code of T2DM, and at least one antidiabetic drug prescription.

**Interventions** Not applicable.

**Main outcome measures** Treatment patterns in untreated (UT) or previously treated (PT) patients receiving antidiabetic therapy; persistence with treatment at 12 months; adherence with treatment as 12 months.

**Results** 40,908 and 90,421 patients were included from the JMDC and MDV databases, respectively. The most frequently prescribed therapy at the index (first prescription) date was dipeptidyl peptidase-4 inhibitor (DPP-4i) in UT patients (JMDC: 44.0%, MDV: 54.8%) and combination therapy in PT patients (74.6%, 81.1%). Most common combinations were DPP-4i plus: biguanide (BG; 11.4%, 10.9%), sulfonylurea (SU; 8.4%, 11.0%), or BG + SU (7.8%, 9.1%). In UT or PT patients from either database whose index prescription was for any antidiabetic drug class(es) other than DPP-4i, the most frequent add-on or switch was to DPP-4i. 12-month persistence with index monotherapy was highest with DPP-4i and BG. Adherence was high ( $\geq 80\%$ ) for all monotherapy schedules, except insulin and glucagon-like peptide-1 agonist, and for the five most frequent 2- and 3-drug combinations. Persistence was greater in elderly UT patients and in those receiving  $\leq 5$  medications, but comparatively worse in UT patients with  $\geq 3$  index antidiabetic drug classes.



1  
2  
3  
4 **Conclusions** The findings indicate that DPP-4i is the most commonly used antidiabetic drug  
5 class in Japanese patients with T2DM, and persistence and adherence to this antidiabetic drug  
6 class is high.  
7  
8

9  
10 **Trial registration** Not applicable.  
11  
12  
13  
14  
15  
16  
17  
18  
19  
20  
21  
22  
23  
24  
25  
26  
27  
28  
29  
30  
31  
32  
33  
34  
35  
36  
37  
38  
39  
40  
41  
42  
43  
44  
45  
46  
47  
48  
49  
50  
51  
52  
53  
54  
55  
56  
57  
58  
59  
60

## Strengths and limitations of this study

- This retrospective evaluation of administrative claims data (2011–2015) using the Japan Medical Data Center (JMDC) and Medical Data Vision (MDV) databases was conducted to determine real-world trends in antidiabetic drug use, and persistence and adherence, in Japanese patients with type 2 diabetes mellitus (T2DM); 40,908 and 90,421 patients were included from the JMDC and MDV databases, respectively.
- The main strengths of the study are that it provides robust real-world evidence from two large administrative claims databases for patterns of antidiabetic drug use in Japanese patients with T2DM, highlighting widespread use of DPP-4i schedules (as monotherapy, add-on therapy, switch therapy, or in combination regimens) and marked persistence and adherence with DPP-4i therapy.
- The study was limited to some extent by the strict inclusion criteria which restricted the number of patients eligible for analysis, and by the use of prescription events rather than patient-derived data to estimate outcomes.
- Database-specific limitations were the relative scarcity of data for patients aged  $\geq 65$  years (JMDC), the absence of information as to whether patients received care in other medical facilities (MDV), and the inability to examine reasons for treatment discontinuation and potential health benefits resulting from increased persistence (JMDC and MDV).
- Uptake of SGLT2i use may not have been accurately captured given the timing of their introduction in Japan.

## Introduction

The prevalence of diabetes mellitus continues to increase globally. In 2015, approximately 415 million people worldwide had diabetes, and this figure is projected to reach almost 650 million by 2040.<sup>1</sup> As about 20% of men and 10% of women in Japan are considered to have, or are highly likely to have, diabetes, the public health implications are enormous.<sup>2</sup>

Disease characteristics in Asian individuals with type 2 diabetes mellitus (T2DM) differ from those in Caucasian patients; Japanese patients with T2DM principally have pancreatic  $\beta$ -cell dysfunction, with less insulin resistance and adiposity than Caucasians.<sup>1</sup> Nevertheless, even in patients with mild metabolic dysfunction, T2DM has serious long-term consequences (i.e. nephropathy, neuropathy, and retinopathy) and is an important risk factor for atherosclerotic cardiovascular diseases.<sup>3,4</sup>

The benefits of early and effective intervention in T2DM are extensively acknowledged. Enhanced glycaemic control can markedly reduce micro- and macroangiopathic development and progression.<sup>4</sup> An intensified intervention to achieve lower treatment targets was shown to be significantly superior to conventional therapy for prevention of cerebrovascular events in patients with T2DM.<sup>5</sup> The Japan Diabetes Society (JDS) has developed evidence-based guidelines for management of diabetes.<sup>6</sup> In patients who fail to achieve adequate glycemic control with diet, exercise and lifestyle improvement alone, treatment options include biguanides (BG), thiazolidinediones (TZD), sulfonylureas (SU), glinides, dipeptidyl peptidase-4 inhibitor (DPP-4i),  $\alpha$ -glucosidase inhibitors ( $\alpha$ -GI), and sodium-glucose cotransporter-2 inhibitors (SGLT2i), with treatment selection to be based on the underlying causes of T2DM.<sup>6</sup>

Despite widespread availability of the JDS guidelines and highly favourable conditions for access to health care in Japan, a 2-year longitudinal study using claims data identified that the quality of care for T2DM patients is often suboptimal.<sup>7</sup> Notably, screening for diabetic renal and ocular disease was less frequent than recommended in the guidelines and less than half of

1  
2  
3  
4 diabetic patients were achieving the glycaemic goal (glycosylated haemoglobin [HbA1c]  
5 <7%) recommended by JDS for their circumstances.  
6  
7

8 Allied to these factors is the potential for suboptimal adherence to, and poor persistence with,  
9 treatment. Adherence is typically lower among patients with chronic conditions compared to  
10 those with acute conditions, and treatment persistence for chronic conditions is particularly  
11 low, tending to decline most dramatically within the first 6 months of treatment.<sup>8</sup> The reasons  
12 for poor adherence and persistence are complex and multifactorial, involving patient- and  
13 physician-related factors as well as treatment regimen factors such as pill burden, regimen  
14 complexity, and dosing schedule.<sup>9</sup>  
15  
16  
17  
18  
19  
20  
21

22 In Japan, it has been estimated that approximately 60% of patients with diabetes forget to  
23 take their medication at some stage.<sup>10</sup> Non-adherence to antidiabetic medications is  
24 associated with increased healthcare expenditure and higher rates of hospitalisation and  
25 death.<sup>11,12</sup> It has been suggested that use of a once-weekly DPP-4i, or a fixed-dose  
26 combination (FDC) therapy, may improve adherence in patients with T2DM.<sup>13</sup> A 10%  
27 increase in adherence has been linked with a 0.1% decrease in HbA1c.<sup>11,14</sup> Recent studies  
28 suggest that dual-therapy schedules containing a DPP-4i may improve persistence relative to  
29 DPP-4i monotherapy,<sup>15</sup> or sulfonylurea (SU)-containing schedules.<sup>16</sup>  
30  
31  
32  
33  
34  
35  
36  
37

38 Contemporary meta-analyses of studies involving incretin-based treatments (i.e. DPP-4i or  
39 glucagon-like peptide-1 [GLP-1] receptor agonists) in patients with T2DM have shown that  
40 these agents are more effective in Asian than in non-Asian populations, possibly due to  
41 greater attenuation of  $\beta$ -cell dysfunction.<sup>1,17-19</sup> Moreover, the HbA1c-reducing activity of  
42 DPP-4i has been linked with fish intake, suggesting that dietary factors may also contribute to  
43 their greater efficacy in Asian patients with T2DM.<sup>1,20,21</sup>  
44  
45  
46  
47  
48  
49

50 Despite widespread recognition of the deleterious long-term consequences of poorly managed  
51 T2DM, and the proven efficacy of incretin-based therapies in Asian populations with  
52 diabetes, surprisingly little is known about actual antidiabetic drug utilisation trends and  
53 persistence and adherence patterns with antidiabetic drug therapy in patients with T2DM in  
54  
55  
56  
57  
58  
59  
60

1  
2  
3  
4 Japan. Under Japan's compulsory insurance system, all residents are legally obligated to be  
5 covered by a form of public health insurance, and claims-related data are captured and stored  
6 in propriety databases. In the current study, data from two large administrative claims  
7 databases were used to determine real-world trends in antidiabetic drug use, and treatment  
8 persistence and adherence rates, in patients with T2DM in Japan.  
9  
10  
11  
12  
13  
14  
15

## 16 **Methods**

### 17 **Overview**

18  
19  
20 This was a real-world, retrospective evaluation of data from two administrative claims  
21 databases in Japan: the Japan Medical Data Center (JMDC) database (Japan Medical Data  
22 Center Co., Ltd; Tokyo, Japan); and the Medical Data Vision (MDV) database (Medical Data  
23 Vision Co., Ltd; Tokyo, Japan). The JMDC database contains monthly claims submitted to  
24 health insurance societies from medical institutions since January 2005 and, as at July 2017,  
25 covered approximately 4 million beneficiaries (employees and their dependants). MDV is a  
26 nationwide hospital-based claims database covering nearly 19 million cumulative patients  
27 since April 2008 who, as at July 2017, had been treated as inpatients or outpatients at the  
28 approximately 300 hospitals in Japan (20% of total number of hospitals) that participate in  
29 the Diagnostic Procedure Combination (DPC)/Per-Diem payment system. Both databases  
30 hold anonymised information about diagnoses, patient characteristics, drug prescriptions,  
31 medical procedures, features of medical facilities, and reimbursement costs. All patient data  
32 are encrypted before entry.  
33  
34  
35  
36  
37  
38  
39  
40  
41  
42  
43  
44  
45  
46

47 Based on Ethical Guidelines for Epidemiological Research issued by the Japanese Ministry of  
48 Health, Labour and Welfare, ethics approval and informed consent were not applicable for  
49 this study.  
50  
51  
52  
53  
54  
55  
56  
57  
58  
59  
60

## Study population

Eligible patients were adults ( $\geq 18$  years) with a diagnosis of T2DM (International Classification of Diseases [ICD]-10 code: E11 or E14) who had been issued at least one prescription for an antidiabetic drug during the target selection period of January 2011 to December 2015. All patients were starting a new antidiabetic drug therapy.

The first prescription date for an antidiabetic drug class initiated during the selection period was the index date, and the antidiabetic drug class prescribed was designated as the index antidiabetic drug class. Only patients with a new prescription during the selection period were included for analysis. The minimum 12-month pre-index ('look-back') period allowed time to observe patients' baseline characteristics and ascertain that the first prescription of a given antidiabetic drug class corresponded to initiation of that drug class. The minimum 12-month post-index observational period allowed time to evaluate treatment-related outcomes of interest.

Patients were excluded for the following reasons: age  $< 18$  years at the index date;  $< 12$  months of continuous enrolment in the database before or after the index date; index prescription received in the 12 months before the index date; no T2DM diagnosis (ICD code E11 or E14) in the pre-index period (fig 1).

The patient population was divided into two subgroups: 1) untreated (UT) patients, i.e. patients without a prescription for any antidiabetic drug class of interest during the pre-index period; and 2) previously treated (PT) patients, i.e. patients with a prescription for at least one non-index antidiabetic drug class during the pre-index period.

## Antidiabetic drug classes of interest

Target antidiabetic drug classes of interest were DPP-4i, BG, SU,  $\alpha$ -GI, TZD, glinides, SGLT2i, insulin and GLP-1 receptor agonists and, in PT patients, the five most common

1  
2  
3  
4 combinations of these same drug classes. Data for insulin and GLP-1 receptor agonists were  
5 excluded from the persistence and adherence analyses mainly because of inconsistent  
6 database information regarding the duration of therapy for these injectable drug classes.  
7  
8  
9

## 10 11 12 13 **Objectives**

14  
15  
16 The primary objectives of the study were to describe patterns of antidiabetic drug use and  
17 persistence and adherence with antidiabetic drug classes in T2DM patients, overall and by  
18 patient subgroup (UT and PT), in the JMDC and MDV database populations.  
19  
20  
21

## 22 23 24 25 **Outcomes**

26  
27  
28 A treatment line was defined as the period during which a patient took a specific antidiabetic  
29 drug class or a combination of antidiabetic drug classes continuously, i.e. without addition of  
30 new class(es) or withdrawal/discontinuation of existing drug class(es). A treatment line-  
31 related event was defined as: an 'add-on' when a new antidiabetic drug class was prescribed  
32 in addition to an existing drug class(es) for more than 21 days (e.g. DPP-4i <<add-on  
33 event>> DPP-4i + metformin); as a 'switch' when at least one new antidiabetic drug class  
34 was prescribed in place of an existing drug class(es) within the grace period which was 1.5  
35 times the median prescription duration for a given drug class (e.g. DPP-4i <<switch event>>  
36 metformin).  
37  
38  
39  
40  
41  
42  
43  
44

45  
46 Treatment persistence was defined as the time from the index date until discontinuation of at  
47 least one index antidiabetic drug class. The median time to discontinuation and the proportion  
48 of patients persistent with treatment at 12 months were reported. The date of discontinuation  
49 was defined as the date of the last prescription of the first discontinued drug in an antidiabetic  
50 drug combination, plus the days of supply of that prescription.  
51  
52  
53  
54  
55  
56  
57  
58  
59  
60

1  
2  
3  
4 Adherence analyses were performed for patients who received at least two prescriptions of  
5 the index antidiabetic drug class(es) during the 12-month post-index follow-up period.

6  
7 Adherence to an antidiabetic drug class of interest was defined as the proportion of days  
8 covered (PDC) or the period in which patients had the treatment in their possession (i.e. from  
9 the index date to first discontinuation of index treatment), and was calculated according to the  
10 formula:  
11  
12

$$\frac{\text{Total number of prescription days covered for defined drug class of interest}}{\text{Total number of days in the follow-up period.}}$$

13  
14  
15  
16  
17  
18  
19  
20 As the JMDC and MDV databases each contain a field corresponding to the number of days'  
21 supply of a medication, these data were used to calculate the number of prescription days.

22  
23  
24  
25 Patients were considered adherent if a PDC of  $\geq 0.8$  (also expressed as an adherence rate of  
26  $\geq 80\%$ ) was achieved. The PDC was calculated from the index date to first discontinuation of  
27 index treatment.  
28  
29

30  
31  
32 Adherence/persistence were calculated according to the number of antidiabetic drug  
33 prescription days, without differentiating between inpatient/outpatient prescribing. No  
34 information was available about possible pill dumping or stockpiling.  
35  
36  
37

### 38 39 40 41 **Statistical analyses**

42  
43  
44 Analyses were performed using SAS® version 9.3 (SAS Institute; Cary, NC, USA) and were  
45 conducted on all patients who met the inclusion criteria and were stratified into the two pre-  
46 specified patient subgroups (UT and PT) on the index date. Patient demographics, clinical  
47 characteristics, treatment-related events affecting index therapy (add-on, switch) and  
48 adherence were reported descriptively. The median time to discontinuation was calculated by  
49 antidiabetic drug class using Kaplan–Meier survival analysis, with differences between  
50 patient subgroups (UT and PT) assessed by log-rank test. The first discontinuation of the  
51  
52  
53  
54  
55  
56  
57  
58  
59  
60



1  
2  
3  
4 index antidiabetic drug class was the survival event and patients were censored if they  
5 reached the end of follow-up without discontinuation.  
6  
7

8 The log-rank test was used to compare the Kaplan–Meier estimates between groups. Cox  
9 regression analysis was used to estimate the hazard ratio of each event, adjusting for baseline  
10 characteristics. For all analyses, a p-value of less than  $\alpha=0.05$  was considered as statistically  
11 significant. For the selection of patient characteristics to be included in regression models, a  
12 threshold level of  $\alpha=0.10$  was used.  
13  
14  
15  
16  
17  
18  
19  
20

### 21 **Patient involvement**

22 No patients were involved in setting the research question or outcome measures, and no  
23 patients were involved in developing plans for study implementation. Furthermore, no  
24 patients were asked for advice about interpretation or writing up of results. There are no plans  
25 to distribute the research findings to study participants or the specific patient community.  
26  
27 Individual patient consent was not required for this study, as the trial was based on  
28 anonymised administrative claims data.  
29  
30  
31  
32  
33  
34  
35  
36  
37  
38

## 39 **Results**

### 40 **Patient disposition**

41  
42 Between January 2011 and December 2015, 94,529 patients in the JMDC database and  
43 721,366 patients in the MDV database with at least one prescription for an antidiabetic drug  
44 class of interest were identified. Of these, 40,908 patients (43.3%) in the JMDC database and  
45 90,421 patients (8.0%) in the MDV database met the inclusion criteria and were included in  
46 the analyses (fig 1). The ratio of UT to PT patients was approximately 1:1 in the JMDC  
47 database and 1:3 in the MDV database.  
48  
49  
50  
51  
52  
53  
54  
55  
56  
57  
58  
59  
60

## Patient characteristics

Patient demographics and clinical characteristics are presented in table 1.

Median duration of follow-up in UT patients was 929 days in the JMDC database and 942 days in the MDV database. Mean age was 51.7 years and 67.6 years, respectively. There was a higher proportion of males (72.3% vs 60.8%), a lower mean number of concurrent medications (2.0 vs 3.0), and lower incidences of comorbid hypertension (47.8% vs 70.1%), hyperlipidaemia (39.8% vs 70.0%), dementia (0.2% vs 1.9%), and diabetic nephropathy (3.7% vs 18.1%) among UT patients in the JMDC versus MDV database.

Among PT patients, median duration of follow-up was 980 days in the JMDC database and 1027 days in the MDV database. Mean age was 54.4 years and 66.9 years, respectively. There was a higher proportion of males (73.5% vs 61.2%), a lower mean number of concurrent medications (2.3 vs 3.3), and lower incidences of comorbid hypertension (58.3% vs 71.3%), hyperlipidaemia (50.0% vs 67.2%), dementia (0.2% vs 2.0%), and diabetic nephropathy (6.1% vs 15.7%) among PT patients in the JMDC versus MDV database.

## Index date therapy

Treatment patterns for index antidiabetic drug classes were broadly similar for UT patients and PT patients irrespective of dataset (JMDC or MDV).

In UT patients (fig 2a), the most common index prescription was for DPP-4i monotherapy (JMDC: 44.0%; MDV: 54.8%), followed by BG, insulin and combination therapy. The composition of combination therapy (i.e. combinations of antidiabetic drug classes) was highly varied.

1  
2  
3  
4 In PT patients (fig 2b), the most common index prescription was for combination therapy  
5 (JMDC: 74.6%; MDV: 81.1%), and the most frequent combinations were a DPP-4i plus a BG  
6 or/and a SU. Combinations could consist of single agents in combination, FDC, or FDC +  
7 single agents in combination. The next most common index therapy in PT patients was DPP-  
8 4i monotherapy (JMDC: 11.0%; MDV: 11.7%). Use of other antidiabetic drug classes as  
9 monotherapy was low.  
10  
11  
12  
13  
14  
15  
16  
17  
18

### 19 **Changes to index therapy**

20  
21 In UT patients who had received a DPP-4i as the index prescription, the most frequent add-on  
22 was a BG (JMDC: 46.6%; MDV: 36.7%). In UT patients whose index prescription was for  
23 any other antidiabetic drug class, the most frequent add-on in all cases (apart from GLP-1  
24 receptor agonists) was a DPP-4i (table 2).  
25  
26  
27  
28  
29

30 In UT patients who had received a DPP-4i as the index prescription, the most frequent  
31 treatment switch to another antidiabetic drug class was to a BG (JMDC: 32.7%; MDV:  
32 26.2%) or insulin (JMDC: 14.3%; MDV: 30.5%). In UT patients whose index prescription  
33 was for any other antidiabetic drug class, the most frequent treatment switch was to a DPP-4i  
34 (table 3).  
35  
36  
37  
38  
39

40 In PT patients who had received a DPP-4i as the index prescription, the most frequent add-on  
41 was a BG (JMDC: 30.4%; MDV: 21.6%), SU (JMDC: 24.5%; MDV: 22.8%), or insulin, but  
42 only in the MDV population (JMDC: 0.7%; MDV: 24.6%). In PT patients whose index  
43 prescription was for any other antidiabetic drug class, the most frequent add-on was a DPP-4i  
44 to all drug classes except GLP-1 receptor agonists in the JMDC database, and was a DPP-4i  
45 to all drug classes except  $\alpha$ -GI and GLP-1 receptor agonists in the MDV database (table 4).  
46  
47  
48  
49  
50  
51

52 In PT patients whose index treatment was a DPP-4i, the most frequent treatment switch was  
53 to insulin (JMDC: 35.0%; MDV: 30.1%). In PT patients whose index prescription was for  
54  
55  
56  
57  
58  
59  
60

1  
2  
3 any other antidiabetic drug class, the most common treatment switch for either dataset was to  
4 a DPP-4i or to insulin (table 5).  
5  
6  
7  
8  
9

### 10 11 **Persistence and adherence with index monotherapy** 12

13  
14 In both patient subgroups across both databases, the probability of remaining on treatment  
15 with index monotherapy at 12 months (not including insulin and GLP-1 receptor agonists)  
16 was highest with DPP-4i schedules and lowest with glinide schedules (table 6). This is  
17 illustrated schematically by Kaplan-Meier survival curves showing the distribution of median  
18 time to treatment discontinuation during 12 months' observation by index antidiabetic drug  
19 class for UT and PT patients in each database. Among UT patients, persistence with all  
20 antidiabetic drug classes was considerably lower in the JMDC database especially with  
21 glinide schedules (fig 3a), than in the MDV database (fig 3b). Among PT patients,  
22 persistence with all antidiabetic drug classes tended to be slightly lower in the JMDC  
23 database for all antidiabetic drug classes except TZD and especially for glinide schedules (fig  
24 3c) than in the MDV database (fig 3d). 12-month persistence rates of approximately 50% or  
25 less were recorded for SU,  $\alpha$ -GI, TZD, and glinides in one or both patient subgroups from  
26 one or both datasets (table 6).  
27  
28  
29  
30  
31  
32  
33  
34  
35  
36  
37  
38

39 Adherence to index antidiabetic drug classes (not including insulin and GLP-1 receptor  
40 agonists) was high in both patient subgroups across both databases, with rates ranging from  
41 75.0% to 98.9%. In UT patients (fig 4a) and in PT patients (fig 4b), adherence rates with  
42 index antidiabetic drug classes were consistently lower in the JMDC database than in the  
43 MDV database. The lowest adherence rates were recorded with SGLT2i in UT patients  
44 (75.0%) and PT patients (77.0%) in the JMDC database.  
45  
46  
47  
48  
49  
50  
51  
52  
53  
54  
55  
56  
57  
58  
59  
60

## Persistence and adherence with index combination therapy

For the five most common antidiabetic drug combinations prescribed to PT patients on the index date (i.e. a DPP-4i plus BG, SU, BG + SU,  $\alpha$ -GI, or SU +  $\alpha$ -GI), 12-month persistence rates were highest for DPP-4i plus BG (JMDC: 53.7%; MDV: 72.0%) and lowest with DPP-4i plus SU +  $\alpha$ -GI (JMDC: 30.8%; MDV: 64.2%) (fig 5). Overall, 12-month persistence rates were considerably lower in the JMDC versus MDV database (fig 5).

For the five most common antidiabetic drug combinations prescribed to PT patients on the index date (i.e. a DPP-4i plus BG, SU, BG + SU,  $\alpha$ -GI, or SU +  $\alpha$ -GI), adherence rates were  $\geq 80\%$  in both database populations although were slightly lower in the JMDC versus MDV database (fig 6).

## Discussion

### Principal findings

This real-world evaluation of data from two administrative claims databases in Japan reveals that the most common index antidiabetic drug class was DPP-4i in UT patients (44–55%) and combination therapy in PT patients (~75–80%), with the latter most frequently comprising dual therapy with a DPP-4i plus a BG or SU.

Among patients with a change to their index antidiabetic drug therapy during follow-up: the most common add-on to DPP-4i index therapy was a BG or SU; the most common add-on to BG or SU index therapy was a DPP-4i; the most common switch from DPP-4i index therapy was to a BG or SU; the most common switch from index drug classes other than DPP-4i (except GLP-1 receptor agonists) was to a DPP-4i. Overall patterns for add-on or switch therapy were similar between the JMDC and MDV datasets and between UT and PT patients.

Across all four patient subgroups, 12-month persistence rates were highest with index DPP-4i monotherapy compared with all other index antidiabetic drug classes, although did not

1  
2  
3  
4 exceed 78.8% (with DPP-4i in PT patients in the MDV database) and were around 50% or  
5  
6 less with several index antidiabetic drug classes especially in the JMDC database. Mean  
7  
8 adherence to antidiabetic monotherapy was high overall, and the proportion of patients with  
9  
10 high adherence ( $\geq 80\%$ ) was higher with index DPP-4i than with all other antidiabetic drug  
11  
12 classes. Among drug combinations, 12-month persistence rates were higher for DPP-4i plus  
13  
14 BG than for other combinations, although did not exceed 72.0%. Adherence rates were  $\geq 80\%$   
15  
16 for commonly prescribed antidiabetic drug combinations.

17  
18 We also analysed persistence ( $\geq 12$  months,  $< 12$  months) and drug adherence ( $< 80\%$ ,  $\geq 80\%$ )  
19  
20 in UT patients according to other patient- and treatment-related factors. Persistence tended to  
21  
22 increase with age (supplementary table 1). In the JMDC database, the adjusted odds ratio for  
23  
24 non-persistence was 3.31 ( $P < 0.05$ ) in the 65–74-year age group compared with the reference  
25  
26 group (18–34 years). In addition, persistence with multiple medications tended to be good in  
27  
28 patients receiving  $\leq 5$  medications, but poorer in patients receiving  $\geq 6$  medications. In the  
29  
30 MDV database, 29.1% of patients with 4–5 medications were non-persistent, whereas 47.6%  
31  
32 of patients with  $> 8$  medications were non-persistent. Persistence was good in patients with  
33  
34 comorbid hypertension (JMDC: 66.0%; MDV: 71.4%) or hyperlipidaemia (JMDC: 62.3%;  
35  
36 MDV: 73.6%). However, persistence was poor in patients treated with multiple antidiabetic  
37  
38 drug classes: in both the JMDC and MDV databases, approximately 60–70% of patients  
39  
40 receiving  $\geq 3$  index antidiabetic drug classes were non-persistent. Similar findings were  
41  
42 evident for adherence (supplementary table 2). In the MDV database, only 2.0% of patients  
43  
44 receiving antidiabetic monotherapy were non-adherent, whereas 6.6–9.5% of those with  $\geq 3$   
45  
46 antidiabetic drugs were non-adherent. All these findings are interesting and suggest that  
47  
48 higher rates of persistence and adherence observed in elderly patients treated with multiple  
49  
50 medications may reflect greater insight by this group into their disease. Conversely, the  
51  
52 relatively low rates of persistence and adherence evident in patients treated with more index  
53  
54 antidiabetic drug classes may have resulted from patient or caregiver difficulties regarding  
55  
56 drug management. Therefore, FDC therapy, with its potential to enhance persistence and  
57  
58  
59  
60

1  
2  
3 adherence, may be especially appropriate for patients treated with several index oral  
4 antidiabetic drug classes.  
5  
6  
7  
8  
9

### 10 11 **Strengths and limitations of the study** 12

13  
14 The main strengths of the present study are that it provides robust real-world evidence from  
15 two large administrative claims databases for patterns of antidiabetic drug use in T2DM  
16 patients in Japan, clearly highlighting the widespread use of DPP-4i schedules (as  
17 monotherapy, add-on therapy, switch therapy, or in combination regimens), and shows  
18 marked persistence and adherence with DPP-4i therapy.  
19  
20  
21  
22

23  
24 The study was limited to some extent by the strict inclusion criteria, which restricted the  
25 proportion of patients from each database eligible for analysis. The analyses did not factor in  
26 HbA1c levels at the start of treatment, or the level of HbA1c control achieved during  
27 treatment, which may have influenced the various treatment decisions. Another limitation  
28 was the use of prescription events, rather than patient-derived data (e.g. patient diaries), to  
29 estimate outcomes. A limitation specific to the JMDC database was the relative scarcity of  
30 data for patients aged  $\geq 65$  years. A limitation specific to the MDV database was the absence  
31 of information about whether patients received care in other medical facilities. For example,  
32 receipt of a prescription at another medical facility could result in a missing medication  
33 history and misclassification of the patient in our analysis. The inability to examine reasons  
34 for treatment discontinuation or to analyse any potential health benefits (e.g. reduced  
35 symptom severity or improved health-related quality of life) resulting from increased  
36 persistence, as such data are not collected in administrative claims databases, were limitations  
37 that applied to both databases. Lastly, the study may not have accurately captured the uptake  
38 of SGLT2i use given the timing of their introduction in Japan. In the first 6 months of their  
39 use (May–October 2015), prescribing of SGLT2i was restricted to 14 days' therapy for safety  
40 reasons, which may have had an impact on usage rates. The restriction applied to this new  
41 class of drugs was routine, as directed by the Japanese Pharmaceuticals and Medical Devices  
42  
43  
44  
45  
46  
47  
48  
49  
50  
51  
52  
53  
54  
55  
56  
57  
58  
59  
60

1  
2  
3 Agency. Further analysis of prescribing practices based on updated databases is required to  
4 reflect current trends.  
5  
6  
7  
8  
9

### 10 11 **Comparison with other studies** 12

13  
14 A recent update to a position statement from the American Diabetes Association and  
15 European Association for the Study of Diabetes regarding management of hyperglycaemia in  
16 T2DM stipulates clearly that metformin is the best therapeutic option for monotherapy.<sup>22–24</sup> If  
17 target HbA1c is not attained after approximately 3 months, progression to double therapy is  
18 advocated. If, after a further 3 months, target HbA1c remains unattained, progression to triple  
19 therapy is recommended. After a 3-month trial of triple therapy, the introduction of  
20 combination injectable therapy with insulin plus a GLP-1 receptor agonist may be indicated.  
21  
22  
23  
24  
25  
26

27  
28 Conversely, JDS guidelines stipulate that the ‘... choice of glucose-lowering agent should be  
29 made based on the disease condition of each particular patient with consideration given to the  
30 pharmacological and safety profile of each glucose-lowering agent’.<sup>6</sup> In accordance with  
31 these recommendations, and in conjunction with appropriate patient education about diet,  
32 exercise and lifestyle, treatment of T2DM in Japan may be started with any oral  
33 hypoglycaemic agent. As illustrated in the current study, DPP-4i are widely used in Japan,  
34 and this concurs with findings from other studies. For example, the ATTAK-J study reported  
35 real-world evidence of significant hypoglycaemic activity and favourable safety for DPP-4i  
36 therapy in Japanese patients with T2DM.<sup>25</sup> The PREFERENCE 4 study documented that  
37 treatment-naïve Japanese patients preferred (in terms of treatment satisfaction) a DPP-4i to a  
38 BG, SU, or  $\alpha$ -GI.<sup>26</sup> Use of a weekly DPP-4i also improved treatment satisfaction.<sup>27,28</sup>  
39  
40  
41  
42  
43  
44  
45  
46  
47  
48 However, these are preliminary findings, and additional real-world data from other DPP-4i  
49 studies are awaited.  
50  
51  
52

53 A systematic review and meta-analysis of studies which compared persistence and adherence  
54 associated with two or more antidiabetic medications in patients with T2DM found  
55  
56  
57  
58  
59



1  
2  
3  
4 considerable variation among studies in the methods used to define these terms but,  
5 nonetheless, was able to ascertain major differences between drug classes.<sup>29</sup> Adherence rates  
6 were higher with DPP-4i than with TZD, SU, and metformin, possibly reflecting the superior  
7 tolerability and convenient dosing schedules of these incretin-based agents.  
8  
9

10  
11 Data about T2DM management in Asian patients indicate that DPP-4i are a viable first-line  
12 intervention, in a manner similar to that of metformin in Caucasian patients with T2DM.<sup>1</sup>  
13 Based on numerous studies involving mainly Japanese or Chinese patients, there is broad  
14 recognition that DPP-4i are more effective in East Asian than non-Asian patients<sup>1,17-19,30</sup> and,  
15 in Japan, >70% of patients treated with antidiabetic drugs receive incretin-based therapies. As  
16 approximately 60% of such patients are treatment-naïve, DPP-4i are establishing a definitive  
17 role in the first-line treatment of T2DM in Japan.<sup>1,31</sup> Although no significant association  
18 between DPP-4i and possible pancreatic disorder was observed in several large-scale  
19 studies,<sup>25,32-34</sup> it is important to remain vigilant for potential safety signals<sup>35</sup> since DPP-4i-  
20 related pancreatitis is a low but established risk.<sup>36</sup>  
21  
22  
23  
24  
25  
26  
27  
28  
29  
30  
31  
32  
33  
34

### 35 **Conclusions and implications**

36  
37 The study indicated that DPP-4i have a prevalent role (as monotherapy, add-on therapy,  
38 switch therapy, and in combination regimens) in the management of T2DM in Japan. The  
39 high persistence and adherence we observed to DPP-4i-containing treatment schedules was a  
40 positive finding given the myriad factors contributing to poor adherence,<sup>9</sup> but also suggested  
41 to us that enhanced diabetes awareness and patient education programmes are needed to  
42 improve persistence and adherence rates overall in Japan. For antidiabetic drug therapy in  
43 general, research is warranted to quantify the extent to which augmenting persistence and  
44 adherence is likely to improve glycaemic control. In the case of DPP-4i, strategies to improve  
45 adherence might involve use of novel once-weekly administration schedules or FDCs.<sup>13,37</sup>  
46  
47 Frequent prescribing of DPP-4i by Japanese physicians and high patient persistence and  
48 adherence with DPP-4i-containing schedules imply satisfaction with treatment. Although  
49  
50  
51  
52  
53  
54  
55  
56  
57  
58  
59  
60

1  
2  
3  
4 there is no current evidence to indicate that DPP-4i provide better glycaemic, microvascular or  
5  
6 macrovascular outcomes compared with metformin or other oral antidiabetic agents in  
7  
8 Japanese patients, they may be a good treatment option where adherence is an issue.  
9  
10  
11  
12  
13  
14  
15  
16  
17  
18  
19  
20  
21  
22  
23  
24  
25  
26  
27  
28  
29  
30  
31  
32  
33  
34  
35  
36  
37  
38  
39  
40  
41  
42  
43  
44  
45  
46  
47  
48  
49  
50  
51  
52  
53  
54  
55  
56  
57  
58  
59  
60

1  
2  
3  
4 The authors thank Ms Kerry Dechant of Content Ed Net for writing and editorial assistance in  
5 the preparation of this manuscript, with funding from Takeda Pharmaceutical Company  
6 Limited, Tokyo, Japan.  
7  
8  
9

10 The study was presented as a poster (P-039) at the 27th Annual Scientific Meeting of the  
11 Japan Epidemiological Association, Yamanashi, Japan, 25-27 January 2017.  
12  
13  
14  
15  
16  
17

### 18 **Contributors and sources:**

19  
20 RN, HK, SH, YO, FG and YS are responsible for the work described in this paper.  
21  
22

23 RN, HK, SH, YO, FG and YS were involved in the conception, design, or planning of the  
24 study.  
25  
26  
27

28 YO and FG were involved in the analysis of data.  
29  
30

31 RN, HK, KK, AO, SH and YS were involved in the interpretation of results.  
32  
33

34 RN, HK, KK, AO and YO contributed substantially to drafting of the manuscript.  
35  
36  
37  
38  
39

### 40 **Funding:**

41  
42 Funding for this research was provided by Takeda Pharmaceutical Company Limited, Tokyo,  
43 Japan.  
44  
45  
46  
47  
48  
49

### 50 **Competing interests:**

51  
52 RN has received speaker honoraria from Astellas Pharma Inc, Nippon Boehringer Ingelheim  
53 Co. Ltd, Eli Lilly Japan K.K., Kissei Pharmaceutical Co. Ltd, Medtronic Japan Co. Ltd, MSD,  
54 Novartis Pharma K.K., Novo Nordisk Pharma Ltd, Sanofi K.K., and Takeda Pharmaceutical  
55  
56  
57  
58  
59  
60

1  
2  
3  
4 Co. Ltd.; and contract research fees for collaborative research with the Japan Diabetes  
5 Foundation.  
6  
7

8 HK, KK, AO, and YS are employees of Takeda Pharmaceutical Co. Ltd.  
9

10 SH was an employee of Takeda Pharmaceutical Co. Ltd. at the time the study was conducted.  
11  
12

13 FG and YO are employees of Creativ-Ceutical K.K.  
14  
15

16  
17  
18  
19 **Data sharing:**  
20

21  
22 Given the administrative nature of the data, patients did not provide informed consent for  
23 data sharing; however, all data are fully anonymised and the risk of patient identification is  
24 low.  
25  
26  
27  
28  
29  
30

31 **Disclaimer:**  
32

33  
34 The study made use of de-identified data from the JMDC and MDV databases. The opinions,  
35 results and conclusions reported are those of the authors. No endorsement by JMDC or MDV  
36 or any of its funders or partners is intended or should be inferred.  
37  
38  
39  
40  
41  
42  
43  
44  
45  
46  
47  
48  
49  
50  
51  
52  
53  
54  
55  
56  
57  
58  
59  
60

## References

1. Seino Y, Kuwata H, Yabe D. Incretin-based drugs for type 2 diabetes: Focus on East Asian perspectives. *J Diabetes Investig* 2016;7 Suppl 1:102–9. doi: 10.1111/jdi.12490 pmid: 27186364.
2. Fujibayashi K, Hayashi M, Yokokawa H, *et al*. Changes in antidiabetic prescription patterns and indicators of diabetic control among 200,000 patients over 13 years at a single institution in Japan. *Diabetol Metab Syndr* 2016;8:72. doi: 10.1186/s13098-016-0187-8 pmid: 27843494.
3. Teramoto T, Sasaki J, Ishibashi S, *et al*. Diabetes mellitus. Executive summary of the Japan Atherosclerosis Society (JAS) guidelines for the diagnosis and prevention of atherosclerotic cardiovascular diseases in Japan—2012 version. *J Atheroscler Thromb* 2014;21:93–8. pmid: 24335040.
4. Araki E, Haneda M, Kasuga M, *et al*. New glycemic targets for patients with diabetes from the Japan Diabetes Society. *J Diabetes Investig* 2017;8:123–5. doi: 10.1111/jdi.12600 pmid: 27935263.
5. Ueki K, Sasako T, Okazaki Y, *et al*. Effect of an intensified multifactorial intervention on cardiovascular outcomes and mortality in type 2 diabetes (J-DOIT3): an open-label, randomised controlled trial. *Lancet Diabetes Endocrinol* 2017;5:951–64. doi: 10.1016/S2213-8587(17)30327-3 pmid: 29079252.
6. Japan Diabetes Society. Treatment Guide for Diabetes 2016-2017. The Japan Diabetes Society: Tokyo, Japan.  
[http://www.fa.kyorin.co.jp/jds/uploads/Treatment\\_Guide\\_for\\_Diabetes\\_2016-2017.pdf](http://www.fa.kyorin.co.jp/jds/uploads/Treatment_Guide_for_Diabetes_2016-2017.pdf) (accessed 13 September 2018).

- 1  
2  
3  
4 7. Tanaka H, Tomio J, Sugiyama T, *et al.* Process quality of diabetes care under favorable  
5 access to healthcare: a 2-year longitudinal study using claims data in Japan. *BMJ Open*  
6 *Diabetes Res Care* 2016;4:e000291. doi: 10.1136/bmjdr-2016-000291 pmid: 27651912.  
7  
8  
9
- 10 8. Osterberg L, Blaschke T. Adherence to medication. *N Engl J Med* 2005;353:487–97.  
11 pmid: 16079372.  
12  
13
- 14 9. Brown MT, Bussell JK. Medication adherence: WHO cares? *Mayo Clin Proc*  
15 2011;86:304–14. doi: 10.4065/mcp.2010.0575 pmid: 21389250  
16  
17  
18
- 19 10. Sugita H, Shinohara R, Yokomichi H, *et al.* Effect of text messages to improve health  
20 literacy on medication adherence in patients with type 2 diabetes mellitus: A randomized  
21 controlled pilot trial. *Nagoya J Med Sci* 2017;79:313–21. doi: 10.18999/nagjms.79.3.313  
22 pmid: 28878436.  
23  
24  
25  
26  
27
- 28 11. Aoki K, Nagakura M, Taguri M, *et al.* Effect of switching from an anti-diabetic loose  
29 dose combination to a fixed dose combination regimen at equivalent dosage for 6 months  
30 on glycemic control in japanese patients with type 2 diabetes: a pilot study. *J Clin Med*  
31 *Res* 2017;9:719–24. doi: 10.14740/jocmr3067w pmid: 28725321.  
32  
33  
34  
35
- 36 12. Fukuda H, Mizobe M. Impact of nonadherence on complication risks and healthcare costs  
37 in patients newly-diagnosed with diabetes. *Diabetes Res Clin Pract* 2017;123:55–62. doi:  
38 10.1016/j.diabres.2016.11.007 pmid: 27940390.  
39  
40  
41  
42
- 43 13. Kaku K. First novel once-weekly DPP-4 inhibitor, trelagliptin, for the treatment of type 2  
44 diabetes mellitus. *Expert Opin Pharmacother* 2015;16:2539–47. doi:  
45 10.1517/14656566.2015.1099630 pmid: 26523434.  
46  
47  
48
- 49 14. Rozenfeld Y, Hunt JS, Plauschinat C, *et al.* Oral antidiabetic medication adherence and  
50 glycemic control in managed care. *Am J Manag Care* 2008;14:71–5. pmid: 18269302.  
51  
52  
53  
54  
55  
56  
57  
58  
59  
60

- 1  
2  
3  
4 15. Kurtyka K, Nishikino R, Ito C, *et al.* Adherence to dipeptidyl peptidase-4 inhibitor  
5 therapy among type 2 diabetes patients with employer-sponsored health insurance in  
6 Japan. *J Diabetes Investig* 2016;7:737–43. doi: 10.1111/jdi.12474 pmid: 27182033.  
7  
8
- 9  
10 16. Bloomgarden ZT, Tunceli K, Liu J, *et al.* Adherence, persistence, and treatment  
11 discontinuation with sitagliptin compared with sulfonylureas as add-ons to metformin: A  
12 retrospective cohort database study. *J Diabetes* 2017;9:677–88. doi: 10.1111/1753-0407  
13 pmid: 27531167.  
14  
15
- 16 17. Kim YG, Hahn S, Oh TJ, *et al.* Differences in the glucose-lowering efficacy of dipeptidyl  
17 peptidase-4 inhibitors between Asians and non-Asians: a systematic review and meta-  
18 analysis. *Diabetologia* 2013;56:696–708. doi: 10.1007/s00125-012-2827-3 pmid:  
19 23344728.  
20  
21
- 22 18. Kim YG, Hahn S, Oh TJ, *et al.* Differences in the HbA1c-lowering efficacy of glucagon-  
23 like peptide-1 analogues between Asians and non-Asians: a systematic review and meta-  
24 analysis. *Diabetes Obes Metab* 2014;16:900–9. doi: 10.1111/dom.12293 pmid:  
25 24655583.  
26  
27
- 28 19. Davis TME, Mulder H, Lokhnygina Y, *et al.* Effect of race on the glycaemic response to  
29 sitagliptin: Insights from the Trial Evaluating Cardiovascular Outcomes with Sitagliptin  
30 (TECOS). *Diabetes Obes Metab*. 2018;20:1427–34.  
31  
32
- 33 20. Iwasaki M, Hoshian F, Tsuji T, *et al.* Predicting efficacy of dipeptidyl peptidase-4  
34 inhibitors in patients with type 2 diabetes: Association of glycated hemoglobin reduction  
35 with serum eicosapentaenoic acid and docosahexaenoic acid levels. *J Diabetes Investig*  
36 2012;3:464–7. doi: 10.1111/j.2040-1124.2012.00214.x pmid: 24843607.  
37  
38
- 39 21. Senmaru T, Fukui M, Kobayashi K, *et al.* Dipeptidyl-peptidase IV inhibitor is effective in  
40 patients with type 2 diabetes with high serum eicosapentaenoic acid concentrations. *J*  
41 *Diabetes Investig* 2012;3:498–502. doi: 10.1111/j.2040-1124.2012.00220.x pmid:  
42 24843614.  
43  
44  
45  
46  
47  
48  
49  
50  
51  
52  
53  
54  
55  
56  
57  
58  
59

- 1  
2  
3  
4 22. Inzucchi SE, Bergenstal RM, Buse JB, *et al.* Management of hyperglycemia in type 2  
5 diabetes: a patient-centered approach: position statement of the American Diabetes  
6 Association (antidiabeticA) and the European Association for the Study of Diabetes  
7 (EASD). *Diabetes Care* 2012;35:1364–79. doi: 10.2337/dc12-0413 pmid: 22517736.  
8  
9  
10  
11  
12 23. Inzucchi SE, Bergenstal RM, Buse JB, *et al.* Management of hyperglycaemia in type 2  
13 diabetes: a patient-centered approach. Position statement of the American Diabetes  
14 Association (antidiabeticA) and the European Association for the Study of Diabetes  
15 (EASD). *Diabetologia* 2012;55:1577–96. doi: 10.1007/s00125-012-2534-0 pmid:  
16 22526604.  
17  
18  
19  
20  
21  
22 24. Inzucchi SE, Bergenstal RM, Buse JB, *et al.* Management of hyperglycemia in type 2  
23 diabetes, 2015: a patient-centered approach: update to a position statement of the  
24 American Diabetes Association and the European Association for the Study of Diabetes.  
25 *Diabetes Care* 2015;38:140–9. doi: 10.2337/dc14-2441 pmid: 25538310.  
26  
27  
28  
29  
30  
31 25. Takeda H, Sasai N, Ito S, *et al.* Efficacy and safety of alogliptin in patients with type 2  
32 diabetes: analysis of the ATTAK-J study. *J Clin Med Res* 2016;8:130–40. doi:  
33 10.14740/jocmr2418w pmid: 26767082.  
34  
35  
36  
37 26. Ishii H, Hayashino Y, Akai Y, *et al.* Dipeptidyl peptidase-4 inhibitors as preferable oral  
38 hypoglycemic agents in terms of treatment satisfaction: Results from a multicenter, 12-  
39 week, open label, randomized controlled study in Japan (PREFERENCE 4 study). *J*  
40 *Diabetes Investig* 2018;9:137–45.  
41  
42  
43  
44  
45  
46 27. Oita M, Miyoshi H, Ono K, *et al.* Satisfaction and efficacy of switching from daily  
47 dipeptidyl peptidase-4 inhibitors to weekly trelagliptin in patients with type 2 diabetes -  
48 Randomized controlled study. *Endocr J* 2018;65:141–50. doi: 10.1507/endocrj.EJ17-  
49 0303.  
50  
51  
52  
53  
54 28. Tosaki T, Kamiya H, Yamamoto Y, *et al.* Efficacy and patient satisfaction of the weekly  
55 DPP-4 inhibitors trelagliptin and omarigliptin in 80 Japanese patients with type 2  
56  
57  
58  
59  
60



- 1  
2  
3  
4 diabetes. *Intern Med* 2017;56:2563–9. doi: 10.2169/internalmedicine.8184-16 pmid:  
5 28883229.  
6
- 7 29. McGovern A, Tippu Z, Hinton W, *et al.* Comparison of medication adherence and  
8 persistence in type 2 diabetes: A systematic review and meta-analysis. *Diabetes Obes*  
9 *Metab* 2018;20:1040–3. doi: 10.1111/dom.13160 pmid: 29135080 [Epub ahead of print]  
10  
11  
12
- 13 30. Ito Y, Ambe K, Kobayashi M, *et al.* Ethnic difference in the pharmacodynamics-efficacy  
14 relationship of dipeptidyl peptidase-4 inhibitors between Japanese and non-Japanese  
15 patients: a systematic review. *Clin Pharmacol Ther* 2017;102:701–8. doi:  
16 10.1002/cpt.692 pmid: 28378919.  
17  
18  
19
- 20 31. Yabe D, Kuwata H, Kaneko M, *et al.* Use of the Japanese health insurance claims  
21 database to assess the risk of acute pancreatitis in patients with diabetes: comparison of  
22 DPP-4 inhibitors with other oral antidiabetic drugs. *Diabetes Obes Metab* 2015;17:430–4.  
23 doi: 10.1111/dom.12381 pmid: 25146418.  
24  
25  
26
- 27 32. Scirica BM, Bhatt DL, Braunwald E, *et al.* Saxagliptin and cardiovascular outcomes in  
28 patients with type 2 diabetes mellitus. *N Engl J Med* 2013;369:1317–26. doi:  
29 10.1056/NEJMoa1307684 pmid: 23992601.  
30  
31  
32
- 33 33. White WB, Cannon CP, Heller SR, *et al.* Alogliptin after acute coronary syndrome in  
34 patients with type 2 diabetes. *N Engl J Med* 2013;369:1327–35. doi:  
35 10.1056/NEJMoa1305889 pmid: 23992602.  
36  
37  
38
- 39 34. Egan AG, Blind E, Dunder K, *et al.* Pancreatic safety of incretin-based drugs--FDA and  
40 EMA assessment. *N Engl J Med* 2014;370:794–7. doi: 10.1056/NEJMp1314078 pmid:  
41 24571751.  
42  
43  
44
- 45 35. Zhang Z, Chen X, Lu P, *et al.* Incretin-based agents in type 2 diabetic patients at  
46 cardiovascular risk: compare the effect of GLP-1 agonists and DPP-4 inhibitors on  
47 cardiovascular and pancreatic outcomes. *Cardiovasc Diabetol* 2017;16:31. doi:  
48 10.1186/s12933-017-0512-z pmid: 28249585.  
49  
50  
51  
52  
53  
54  
55  
56  
57  
58  
59

1  
2  
3  
4 36. DeVries JH, Rosenstock J. DPP-4 inhibitor-related pancreatitis: rare but real! *Diabetes*  
5 *Care* 2017;40:161–3. doi: 10.2337/dci16-0035.  
6  
7

8 37. Inagaki N, Onouchi H, Maezawa H, *et al.* Once-weekly trelagliptin versus daily alogliptin  
9 in Japanese patients with type 2 diabetes: a randomised, double-blind, phase 3, non-  
10 inferiority study. *Lancet Diabetes Endocrinol* 2015;3:191–7. doi: 10.1016/S2213-  
11 8587(14)70251-7 pmid: 25609193.  
12  
13  
14  
15  
16  
17  
18  
19  
20  
21  
22  
23  
24  
25  
26  
27  
28  
29  
30  
31  
32  
33  
34  
35  
36  
37  
38  
39  
40  
41  
42  
43  
44  
45  
46  
47  
48  
49  
50  
51  
52  
53  
54  
55  
56  
57  
58  
59  
60

## Tables

**Table 1 Patient demographics and clinical characteristics**

| Characteristics                        | UT patients               |                          | PT patients               |                          |
|----------------------------------------|---------------------------|--------------------------|---------------------------|--------------------------|
|                                        | JMDC database<br>n=19 428 | MDV database<br>n=24 820 | JMDC database<br>n=21 480 | MDV database<br>n=65 601 |
| Follow-up, days, median (IQR):         | 929 (635; 1345)           | 942 (675; 1356)          | 980 (671; 1446)           | 1027 (715; 1521)         |
| Age at index date, years, mean (SD):   | 51.7 (9.9)                | 67.6 (11.8)              | 54.4 (9.2)                | 65.9 (12.0)              |
| Gender: male, n (%):                   | 14 042 (72.3)             | 15 093 (60.8)            | 15 779 (73.5)             | 40 160 (61.2)            |
| Multiple medications*, mean (SD):      | 2.0 (4.0)                 | 3.0 (2.2)                | 2.3 (3.1)                 | 3.3 (2.0)                |
| Charlson Comorbidity Index, mean (SD): | 2.2 (1.5)                 | 2.5 (2.3)                | 2.5 (1.6)                 | 2.6 (2.2)                |
| Comorbidities                          |                           |                          |                           |                          |
| Hypertension (% pts)                   | 47.8                      | 70.1                     | 58.3                      | 71.3                     |
| Hyperlipidaemia (% pts)                | 39.8                      | 70.0                     | 50.0                      | 67.2                     |
| Dementia (% pts)                       | 0.2                       | 1.9                      | 0.2                       | 2.0                      |
| Diabetic nephropathy (% pts)           | 3.7                       | 18.1                     | 6.1                       | 15.7                     |

\* Number of drugs prescribed (by 3-digit Anatomical Therapeutic Chemical Classification System)

JMDC, Japan Medical Data Center; MDV, Medical Data Vision; IQR, interquartile range; PT, previously treated; pts, patients; SD, standard deviation; UT, untreated.

**Table 2 Changes to index therapy: add-on treatment over 12 months according to index antidiabetic drug class in UT patients, n (%)**

| <i>JMDC database</i>           |               |               |              |                               |              |                |               |                |              |
|--------------------------------|---------------|---------------|--------------|-------------------------------|--------------|----------------|---------------|----------------|--------------|
| <b>Index treatment</b>         | <b>DPP-4i</b> | <b>BG</b>     | <b>SU</b>    | <b><math>\alpha</math>-GI</b> | <b>TZD</b>   | <b>Glinide</b> | <b>SGLT2i</b> | <b>Insulin</b> | <b>GLP-1</b> |
| <b>Pts with add-on therapy</b> | <b>n=2839</b> | <b>n=1102</b> | <b>n=364</b> | <b>n=316</b>                  | <b>n=102</b> | <b>n=50</b>    | <b>n=76</b>   | <b>n=7</b>     | <b>n=8</b>   |
| + DPP-4i                       | NA            | 748 (67.9)    | 208 (57.1)   | 146 (46.2)                    | 57 (55.9)    | 21 (42.0)      | 34 (44.7)     | 4 (57.1)       | 1 (12.5)     |
| + BG                           | 1324 (46.6)   | NA            | 80 (22.0)    | 85 (26.9)                     | 21 (20.6)    | 9 (18.0)       | 28 (36.8)     | 2 (28.6)       | 1 (12.5)     |
| + SU                           | 537 (18.9)    | 66 (6.0)      | NA           | 30 (9.5)                      | 8 (7.8)      | 1 (2.0)        | 5 (6.6)       | 0 (0.0)        | 2 (25.0)     |
| + $\alpha$ -GI                 | 255 (9.0)     | 40 (3.6)      | 25 (6.9)     | NA                            | 4 (3.9)      | 15 (30.0)      | 5 (6.6)       | 0 (0.0)        | 0 (0.0)      |
| + TZD                          | 293 (10.3)    | 58 (5.3)      | 20 (5.5)     | 16 (5.1)                      | NA           | 1 (2.0)        | 1 (1.3)       | 0 (0.0)        | 2 (25.0)     |
| + Glinide                      | 79 (2.8)      | 16 (1.5)      | 0 (0.0)      | 17 (5.4)                      | 0 (0.0)      | NA             | 0 (0.0)       | 1 (14.3)       | 0 (0.0)      |
| + SGLT2i                       | 256 (9.0)     | 128 (11.6)    | 11 (3.0)     | 2 (0.6)                       | 7 (6.9)      | 2 (4.0)        | NA            | 0 (0.0)        | 2 (25.0)     |
| + Insulin                      | 5 (0.2)       | 2 (0.2)       | 1 (0.3)      | 1 (0.3)                       | 0 (0.0)      | 0 (0.0)        | 0 (0.0)       | NA             | 0 (0.0)      |
| + GLP-1                        | 0 (0.0)       | 16 (1.5)      | 2 (0.5)      | 2 (0.6)                       | 0 (0.0)      | 0 (0.0)        | 0 (0.0)       | 0 (0.0)        | NA           |
| <i>MDV database</i>            |               |               |              |                               |              |                |               |                |              |
| <b>Index treatment</b>         | <b>DPP-4i</b> | <b>BG</b>     | <b>SU</b>    | <b><math>\alpha</math>-GI</b> | <b>TZD</b>   | <b>Glinide</b> | <b>SGLT2i</b> | <b>Insulin</b> | <b>GLP-1</b> |
| <b>Pts with add-on therapy</b> | <b>n=3179</b> | <b>n=878</b>  | <b>n=342</b> | <b>n=344</b>                  | <b>n=81</b>  | <b>n=74</b>    | <b>n=35</b>   | <b>n=24</b>    | <b>n=12</b>  |
| + DPP-4i                       | NA            | 602 (68.6)    | 215 (62.9)   | 208 (60.5)                    | 43 (53.1)    | 42 (56.8)      | 12 (34.3)     | 113 (50.4)     | 0 (0.0)      |
| + BG                           | 1168 (36.7)   | NA            | 51 (14.9)    | 36 (10.5)                     | 14 (17.3)    | 7 (9.5)        | 12 (34.3)     | 26 (11.6)      | 4 (33.3)     |
| + SU                           | 736 (23.2)    | 44 (5.0)      | NA           | 36 (10.5)                     | 3 (3.7)      | 1 (1.4)        | 4 (11.4)      | 10 (4.5)       | 4 (33.3)     |
| + $\alpha$ -GI                 | 414 (13.0)    | 38 (4.3)      | 29 (8.5)     | NA                            | 6 (7.4)      | 15 (20.3)      | 0 (0.0)       | 28 (12.5)      | 1 (8.3)      |
| + TZD                          | 168 (5.3)     | 29 (3.3)      | 13 (3.8)     | 4 (1.2)                       | NA           | 4 (5.4)        | 0 (0.0)       | 1 (0.4)        | 0 (0.0)      |
| + Glinide                      | 189 (5.9)     | 9 (1.0)       | 0 (0.0)      | 26 (7.6)                      | 2 (2.5)      | NA             | 0 (0.0)       | 12 (5.4)       | 0 (0.0)      |
| + SGLT2i                       | 190 (6.0)     | 94 (10.7)     | 7 (2.0)      | 5 (1.5)                       | 8 (9.9)      | 0 (0.0)        | NA            | 2 (0.9)        | 3 (25.0)     |

1  
2  
3  
4  
5  
6  
7  
8  
9  
10  
11  
12  
13  
14  
15  
16  
17  
18  
19  
20  
21  
22  
23  
24  
25  
26  
27  
28  
29  
30  
31  
32  
33  
34  
35  
36  
37  
38  
39  
40  
41  
42  
43  
44  
45  
46  
47

|           |           |          |          |          |         |         |          |         |         |
|-----------|-----------|----------|----------|----------|---------|---------|----------|---------|---------|
| + Insulin | 239 (7.5) | 35 (4.0) | 14 (4.1) | 19 (5.5) | 1 (1.2) | 3 (4.1) | 1 (2.9)  | NA      | 0 (0.0) |
| + GLP-1   | 2 (0.1)   | 10 (1.1) | 4 (1.2)  | 1 (0.3)  | 0 (0.0) | 1 (1.4) | 4 (11.4) | 0 (0.0) | NA      |

‘+’ indicates add-on therapy with new antidiabetic drug class.

$\alpha$ -GI,  $\alpha$ -glucosidase inhibitor; DPP-4i, dipeptidyl peptidase-4 inhibitor; GLP-1, glucagon-like peptide-1; JMDC, Japan Medical Data Center; MDV, Medical Data Vision; NA, not applicable; pts, patients; SGLT2i, sodium-glucose cotransporter-2 inhibitor; TZD, thiazolidinedione; UT, untreated.

For peer review only

**Table 3 Changes to index therapy: switch treatment over 12 months according to index antidiabetic drug class in PT patients, n (%)**

| <i>JMDC database</i>           |               |              |              |              |             |                |               |                |              |
|--------------------------------|---------------|--------------|--------------|--------------|-------------|----------------|---------------|----------------|--------------|
| <b>Index treatment</b>         | <b>DPP-4i</b> | <b>BG</b>    | <b>SU</b>    | <b>α-GI</b>  | <b>TZD</b>  | <b>Glinide</b> | <b>SGLT2i</b> | <b>Insulin</b> | <b>GLP-1</b> |
| <b>Pts with switch therapy</b> | <b>n=440</b>  | <b>n=267</b> | <b>n=224</b> | <b>n=221</b> | <b>n=76</b> | <b>n=44</b>    | <b>n=50</b>   | <b>n=336</b>   | <b>n=6</b>   |
| → DPP-4i                       | NA            | 157 (58.8)   | 106 (47.3)   | 126 (57.0)   | 43 (56.6)   | 22 (50.0)      | 26 (52.0)     | 115 (34.2)     | 1 (16.7)     |
| → BG                           | 144 (32.7)    | NA           | 47 (21.0)    | 40 (18.1)    | 15 (19.7)   | 8 (18.2)       | 13 (26.0)     | 107 (31.8)     | 1 (16.7)     |
| → SU                           | 52 (11.8)     | 12 (4.5)     | NA           | 4 (1.8)      | 0 (0.0)     | 3 (6.8)        | 1 (2.0)       | 11 (3.3)       | 1 (16.7)     |
| → α-GI                         | 20 (4.5)      | 12 (4.5)     | 4 (1.8)      | NA           | 2 (2.6)     | 2 (4.5)        | 2 (4.0)       | 19 (5.7)       | 0 (0.0)      |
| → TZD                          | 26 (5.9)      | 19 (7.1)     | 8 (3.6)      | 11 (5.0)     | NA          | 0 (0.0)        | 0 (0.0)       | 5 (1.5)        | 0 (0.0)      |
| → Glinide                      | 22 (5.0)      | 3 (1.1)      | 5 (2.2)      | 11 (5.0)     | 0 (0.0)     | NA             | 0 (0.0)       | 11 (3.3)       | 0 (0.0)      |
| → SGLT2i                       | 82 (18.6)     | 26 (9.7)     | 3 (1.3)      | 10 (4.5)     | 7 (9.2)     | 3 (6.8)        | NA            | 2 (0.6)        | 1 (16.7)     |
| → Insulin                      | 63 (14.3)     | 17 (6.4)     | 36 (16.1)    | 8 (3.6)      | 5 (6.6)     | 4 (9.1)        | 2 (4.0)       | NA             | 2 (33.3)     |
| → GLP-1                        | 7 (1.6)       | 3 (1.1)      | 0 (0.0)      | 0 (0.0)      | 1 (1.3)     | 0 (0.0)        | 0 (0.0)       | 6 (1.8)        | NA           |
| <i>MDV database</i>            |               |              |              |              |             |                |               |                |              |
| <b>Index treatment</b>         | <b>DPP-4i</b> | <b>BG</b>    | <b>SU</b>    | <b>α-GI</b>  | <b>TZD</b>  | <b>Glinide</b> | <b>SGLT2i</b> | <b>Insulin</b> | <b>GLP-1</b> |
| <b>Pts with switch therapy</b> | <b>n=446</b>  | <b>n=271</b> | <b>n=199</b> | <b>n=224</b> | <b>n=69</b> | <b>n=47</b>    | <b>n=20</b>   | <b>n=417</b>   | <b>n=11</b>  |
| → DPP-4i                       | NA            | 206 (76.0)   | 144 (72.4)   | 155 (69.2)   | 41 (59.4)   | 24 (51.1)      | 6 (30.0)      | 224 (53.7)     | 5 (45.5)     |
| → BG                           | 117 (26.2)    | NA           | 15 (7.5)     | 21 (9.4)     | 14 (20.3)   | 4 (8.5)        | 6 (30.0)      | 34 (8.2)       | 2 (18.2)     |
| → SU                           | 51 (11.4)     | 12 (4.4)     | NA           | 15 (6.7)     | 4 (5.8)     | 4 (8.5)        | 2 (10.0)      | 25 (6.0)       | 0 (0.0)      |
| → α-GI                         | 38 (8.5)      | 7 (2.6)      | 1 (0.5)      | NA           | 1 (1.4)     | 7 (14.9)       | 0 (0.0)       | 26 (6.2)       | 0 (0.0)      |
| → TZD                          | 18 (4.0)      | 9 (3.3)      | 0 (0.0)      | 4 (1.8)      | NA          | 0 (0.0)        | 0 (0.0)       | 7 (1.7)        | 0 (0.0)      |
| → Glinide                      | 14 (3.1)      | 4 (1.5)      | 5 (2.5)      | 10 (4.5)     | 0 (0.0)     | NA             | 0 (0.0)       | 30 (7.2)       | 0 (0.0)      |
| → SGLT2i                       | 52 (11.7)     | 14 (5.2)     | 2 (1.0)      | 1 (0.4)      | 3 (4.3)     | 0 (0.0)        | NA            | 2 (0.5)        | 2 (18.2)     |

1  
2  
3  
4  
5  
6  
7  
8  
9  
10  
11  
12  
13  
14  
15  
16  
17  
18  
19  
20  
21  
22  
23  
24  
25  
26  
27  
28  
29  
30  
31  
32  
33  
34  
35  
36  
37  
38  
39  
40  
41  
42  
43  
44  
45  
46  
47

|                 |            |          |           |          |         |          |          |         |         |
|-----------------|------------|----------|-----------|----------|---------|----------|----------|---------|---------|
| → Insulin       | 136 (30.5) | 10 (3.7) | 21 (10.6) | 15 (6.7) | 4 (5.8) | 6 (12.8) | 0 (0.0)  | NA      | 1 (9.1) |
| → GLP-1 agonist | 11 (2.5)   | 4 (1.5)  | 1 (0.5)   | 0 (0.0)  | 0 (0.0) | 0 (0.0)  | 2 (10.0) | 9 (2.2) | NA      |

‘→’ indicates treatment switch to new antidiabetic drug class.

α-GI, α-glucosidase inhibitor; DPP-4i, dipeptidyl peptidase-4 inhibitor; GLP-1, glucagon-like peptide-1; JMDC, Japan Medical Data Center; MDV, Medical Data Vision; NA, not applicable; pts, patients; SGLT2i, sodium-glucose cotransporter-2 inhibitor; TZD, thiazolidinedione; UT, untreated.

For peer review only

**Table 4 Changes to index therapy: add-on treatment over 12 months according to index antidiabetic drug class in PT patients, n (%)**

| <i>JMDC database</i>           |               |              |              |              |             |                |               |                |              |
|--------------------------------|---------------|--------------|--------------|--------------|-------------|----------------|---------------|----------------|--------------|
| <b>Index treatment</b>         | <b>DPP-4i</b> | <b>BG</b>    | <b>SU</b>    | <b>α-GI</b>  | <b>TZD</b>  | <b>Glinide</b> | <b>SGLT2i</b> | <b>Insulin</b> | <b>GLP-1</b> |
| <b>Pts with add-on therapy</b> | <b>n=1141</b> | <b>n=370</b> | <b>n=163</b> | <b>n=119</b> | <b>n=68</b> | <b>n=71</b>    | <b>n=129</b>  | <b>n=9</b>     | <b>n=53</b>  |
| + DPP-4i                       | NA            | 186 (50.3)   | 77 (47.2)    | 52 (43.7)    | 18 (26.5)   | 30 (42.3)      | 39 (30.2)     | 5 (55.6)       | 0 (0.0)      |
| + BG                           | 347 (30.4)    | NA           | 23 (14.1)    | 14 (11.8)    | 11 (16.2)   | 12 (16.9)      | 19 (14.7)     | 0 (0.0)        | 12 (22.6)    |
| + SU                           | 279 (24.5)    | 27 (7.3)     | NA           | 12 (10.1)    | 9 (13.2)    | 1 (1.4)        | 5 (3.9)       | 2 (22.2)       | 15 (28.3)    |
| + α-GI                         | 172 (15.1)    | 21 (5.7)     | 13 (8.0)     | NA           | 2 (2.9)     | 10 (14.1)      | 2 (1.6)       | 1 (11.1)       | 3 (5.7)      |
| + TZD                          | 120 (10.5)    | 13 (3.5)     | 12 (7.4)     | 1 (0.8)      | NA          | 0 (0.0)        | 4 (3.1)       | 0 (0.0)        | 1 (1.9)      |
| + Glinide                      | 43 (3.8)      | 8 (2.2)      | 1 (0.6)      | 6 (5.0)      | 1 (1.5)     | NA             | 0 (0.0)       | 1 (11.1)       | 0 (0.0)      |
| + SGLT2i                       | 46 (4.0)      | 24 (6.5)     | 3 (1.8)      | 2 (1.7)      | 0 (0.0)     | 2 (2.8)        | NA            | 0 (0.0)        | 2 (3.8)      |
| + Insulin                      | 8 (0.7)       | 3 (0.8)      | 0 (0.0)      | 1 (0.8)      | 0 (0.0)     | 0 (0.0)        | 0 (0.0)       | NA             | 0 (0.0)      |
| + GLP-1 agonist                | 3 (0.3)       | 16 (4.3)     | 7 (4.3)      | 3 (2.5)      | 2 (2.9)     | 0 (0.0)        | 3 (2.3)       | 0 (0.0)        | NA           |
| <i>MDV database</i>            |               |              |              |              |             |                |               |                |              |
| <b>Index treatment</b>         | <b>DPP-4i</b> | <b>BG</b>    | <b>SU</b>    | <b>α-GI</b>  | <b>TZD</b>  | <b>Glinide</b> | <b>SGLT2i</b> | <b>Insulin</b> | <b>GLP-1</b> |
| <b>Pts with add-on therapy</b> | <b>n=3362</b> | <b>n=616</b> | <b>n=322</b> | <b>n=211</b> | <b>n=53</b> | <b>n=180</b>   | <b>n=114</b>  | <b>n=335</b>   | <b>n=140</b> |
| + DPP-4i                       | NA            | 249 (40.4)   | 177 (55.0)   | 63 (29.9)    | 15 (28.3)   | 66 (36.7)      | 38 (33.3)     | 128 (38.2)     | 1 (0.7)      |
| + BG                           | 727 (21.6)    | NA           | 31 (9.6)     | 8 (3.8)      | 7 (13.2)    | 16 (8.9)       | 23 (20.2)     | 35 (10.4)      | 18 (12.9)    |
| + SU                           | 768 (22.8)    | 38 (6.2)     | NA           | 11 (5.2)     | 6 (11.3)    | 1 (0.6)        | 4 (3.5)       | 12 (3.6)       | 61 (43.6)    |
| + α-GI                         | 444 (13.2)    | 28 (4.5)     | 20 (6.2)     | NA           | 1 (1.9)     | 25 (13.9)      | 3 (2.6)       | 28 (8.4)       | 11 (7.9)     |
| + TZD                          | 131 (3.9)     | 15 (2.4)     | 9 (2.8)      | 3 (1.4)      | NA          | 3 (1.7)        | 1 (0.9)       | 5 (1.5)        | 1 (0.7)      |
| + Glinide                      | 216 (6.4)     | 10 (1.6)     | 1 (0.3)      | 9 (4.3)      | 0 (0.0)     | NA             | 0 (0.0)       | 10 (3.0)       | 5 (3.6)      |
| + SGLT2i                       | 59 (1.8)      | 29 (4.7)     | 4 (1.2)      | 2 (0.9)      | 3 (5.7)     | 2 (1.1)        | NA            | 6 (1.8)        | 3 (2.1)      |



1  
2  
3  
4  
5  
6  
7  
8  
9  
10  
11  
12  
13  
14  
15  
16  
17  
18  
19  
20  
21  
22  
23  
24  
25  
26  
27  
28  
29  
30  
31  
32  
33  
34  
35  
36  
37  
38  
39  
40  
41  
42  
43  
44  
45  
46  
47

|                 |            |            |           |           |           |           |         |          |           |
|-----------------|------------|------------|-----------|-----------|-----------|-----------|---------|----------|-----------|
| + Insulin       | 828 (24.6) | 163 (26.5) | 37 (11.5) | 80 (37.9) | 14 (26.4) | 45 (25.0) | 7 (6.1) | NA       | 22 (15.7) |
| + GLP-1 agonist | 1 (0.0)    | 24 (3.9)   | 16 (5.0)  | 3 (1.4)   | 2 (3.8)   | 2 (1.1)   | 6 (5.3) | 12 (3.6) | NA        |

‘+’ indicates add-on therapy with new antidiabetic drug class.

$\alpha$ -GI,  $\alpha$ -glucosidase inhibitor; DPP-4i, dipeptidyl peptidase-4 inhibitor; GLP-1, glucagon-like peptide-1; JMDC, Japan Medical Data Center; MDV, Medical Data Vision; NA, not applicable; PT, previously treated; pts, patients; SGLT2i, sodium-glucose cotransporter-2 inhibitor; TZD, thiazolidinedione.

For peer review only

**Table 5 Changes to index therapy: switch treatment over 12 months according to index antidiabetic drug class in PT patients, n (%)**

| <i>JMDC database</i>           |               |              |              |              |             |                |               |                |              |
|--------------------------------|---------------|--------------|--------------|--------------|-------------|----------------|---------------|----------------|--------------|
| <b>Index treatment</b>         | <b>DPP-4i</b> | <b>BG</b>    | <b>SU</b>    | <b>α-GI</b>  | <b>TZD</b>  | <b>Glinide</b> | <b>SGLT2i</b> | <b>Insulin</b> | <b>GLP-1</b> |
| <b>Pts with switch therapy</b> | <b>n=303</b>  | <b>n=92</b>  | <b>n=56</b>  | <b>n=70</b>  | <b>n=46</b> | <b>n=38</b>    | <b>n=50</b>   | <b>n=268</b>   | <b>n=27</b>  |
| → DPP-4i                       | NA            | 27 (29.3)    | 15 (26.8)    | 14 (20.0)    | 20 (43.5)   | 14 (36.8)      | 16 (32.0)     | 84 (31.3)      | 4 (14.8)     |
| → BG                           | 44 (14.5)     | NA           | 8 (14.3)     | 8 (11.4)     | 8 (17.4)    | 2 (5.3)        | 6 (12.0)      | 48 (17.9)      | 6 (22.2)     |
| → SU                           | 56 (18.5)     | 8 (8.7)      | NA           | 3 (4.3)      | 5 (10.9)    | 5 (13.2)       | 2 (4.0)       | 27 (10.1)      | 5 (18.5)     |
| → α-GI                         | 15 (5.0)      | 2 (2.2)      | 1 (1.8)      | NA           | 1 (2.2)     | 3 (7.9)        | 1 (2.0)       | 17 (6.3)       | 2 (7.4)      |
| → TZD                          | 14 (4.6)      | 8 (8.7)      | 1 (1.8)      | 1 (1.4)      | NA          | 2 (5.3)        | 4 (8.0)       | 6 (2.2)        | 1 (3.7)      |
| → Glinide                      | 12 (4.0)      | 2 (2.2)      | 4 (7.1)      | 1 (1.4)      | 0 (0.0)     | NA             | 1 (2.0)       | 7 (2.6)        | 0 (0.0)      |
| → SGLT2i                       | 17 (5.6)      | 2 (2.2)      | 1 (1.8)      | 0 (0.0)      | 0 (0.0)     | 0 (0.0)        | NA            | 1 (0.4)        | 1 (3.7)      |
| → Insulin                      | 106 (35.0)    | 37 (40.2)    | 18 (32.1)    | 37 (52.9)    | 6 (13.0)    | 6 (15.8)       | 9 (18.0)      | NA             | 7 (25.9)     |
| → GLP-1                        | 8 (2.6)       | 1 (1.1)      | 0 (0.0)      | 0 (0.0)      | 1 (2.2)     | 0 (0.0)        | 2 (4.0)       | 9 (3.4)        | NA           |
| <i>MDV database</i>            |               |              |              |              |             |                |               |                |              |
| <b>Index treatment</b>         | <b>DPP-4i</b> | <b>BG</b>    | <b>SU</b>    | <b>α-GI</b>  | <b>TZD</b>  | <b>Glinide</b> | <b>SGLT2i</b> | <b>Insulin</b> | <b>GLP-1</b> |
| <b>Pts with switch therapy</b> | <b>n=651</b>  | <b>n=154</b> | <b>n=135</b> | <b>n=119</b> | <b>n=36</b> | <b>n=119</b>   | <b>n=34</b>   | <b>n=480</b>   | <b>n=75</b>  |
| → DPP-4i                       | NA            | 57 (37.0)    | 67 (49.6)    | 44 (37.0)    | 15 (41.7)   | 43 (36.1)      | 15 (44.1)     | 164 (34.2)     | 19 (25.3)    |
| → BG                           | 66 (10.1)     | NA           | 7 (5.2)      | 6 (5.0)      | 4 (11.1)    | 3 (2.5)        | 6 (17.6)      | 19 (4.0)       | 5 (6.7)      |
| → SU                           | 168 (25.8)    | 13 (8.4)     | NA           | 6 (5.0)      | 4 (11.1)    | 22 (18.5)      | 1 (2.9)       | 48 (10.0)      | 4 (5.3)      |
| → α-GI                         | 66 (10.1)     | 7 (4.5)      | 3 (2.2)      | NA           | 1 (2.8)     | 9 (7.6)        | 0 (0.0)       | 18 (3.8)       | 2 (2.7)      |
| → TZD                          | 26 (4.0)      | 11 (7.1)     | 2 (1.5)      | 3 (2.5)      | NA          | 0 (0.0)        | 1 (2.9)       | 10 (2.1)       | 2 (2.7)      |
| → Glinide                      | 48 (7.4)      | 3 (1.9)      | 8 (5.9)      | 2 (1.7)      | 0 (0.0)     | NA             | 0 (0.0)       | 32 (6.7)       | 2 (2.7)      |
| → SGLT2i                       | 16 (2.5)      | 3 (1.9)      | 2 (1.5)      | 2 (1.7)      | 1 (2.8)     | 0 (0.0)        | NA            | 2 (0.4)        | 0 (0.0)      |

1  
2  
3  
4  
5  
6  
7  
8  
9  
10  
11  
12  
13  
14  
15  
16  
17  
18  
19  
20  
21  
22  
23  
24  
25  
26  
27  
28  
29  
30  
31  
32  
33  
34  
35  
36  
37  
38  
39  
40  
41  
42  
43  
44  
45  
46  
47

|                 |            |           |           |           |           |           |         |         |           |
|-----------------|------------|-----------|-----------|-----------|-----------|-----------|---------|---------|-----------|
| → Insulin       | 196 (30.1) | 48 (31.2) | 32 (23.7) | 45 (37.8) | 10 (27.8) | 27 (22.7) | 1 (2.9) | NA      | 26 (34.7) |
| → GLP-1 agonist | 18 (2.8)   | 1 (0.6)   | 0 (0.0)   | 1 (0.8)   | 0 (0.0)   | 1 (0.8)   | 3 (8.8) | 3 (0.6) | NA        |

‘→’ indicates treatment switch to new antidiabetic drug.  
DPP-4i, dipeptidyl peptidase-4 inhibitor;  $\alpha$ -GI,  $\alpha$ -glucosidase inhibitor; GLP-1, glucagon-like peptide-1; JMDC, Japan Medical Data Center; MDV, Medical Data Vision; NA, not applicable; PT, previously treated; pts, patients; SGLT2i, sodium-glucose cotransporter-2 inhibitor; TZD, thiazolidinedione.

For peer review only

**Table 6 Persistence with monotherapy schedules of index antidiabetic drug classes*****UT patients***

| <b>Index therapy</b>                  | <b>DPP-4i</b>   | <b>BG</b>     | <b>SU</b>     | <b><math>\alpha</math>-GI</b> | <b>TZD</b>   | <b>Glinide</b> | <b>SGLT2i</b> |
|---------------------------------------|-----------------|---------------|---------------|-------------------------------|--------------|----------------|---------------|
| <b>JMDC database</b>                  | <b>n=8545</b>   | <b>n=3354</b> | <b>n=979</b>  | <b>n=1346</b>                 | <b>n=504</b> | <b>n=165</b>   | <b>n=430</b>  |
| Median time to discontinuation (days) | 1138.0          | 582.0         | 384.0         | 280.0                         | 400.0        | 161.0          | 471.0         |
| 12-month persistence rate (% pts)     | 67.4            | 57.3          | 50.4          | 45.5                          | 51.2         | 38.8           | 53.5          |
| <b>MDV database</b>                   | <b>n=13 598</b> | <b>n=2777</b> | <b>n=1174</b> | <b>n=1666</b>                 | <b>n=449</b> | <b>n=292</b>   | <b>n=224</b>  |
| Median time to discontinuation (days) | 707.0           | 672.0         | 474.5         | 458.0                         | 491.0        | 438.5          | 537.5         |
| 12-month persistence rate (% pts)     | 77.2            | 73.8          | 56.0          | 54.9                          | 57.2         | 53.8           | 63.4          |

***PT patients***

| <b>Index therapy</b>                  | <b>DPP-4i</b> | <b>BG</b>     | <b>SU</b>    | <b><math>\alpha</math>-GI</b> | <b>TZD</b>   | <b>Glinide</b> | <b>SGLT2i</b> |
|---------------------------------------|---------------|---------------|--------------|-------------------------------|--------------|----------------|---------------|
| <b>JMDC database</b>                  | <b>n=2354</b> | <b>n=680</b>  | <b>n=284</b> | <b>n=256</b>                  | <b>n=158</b> | <b>n=135</b>   | <b>n=285</b>  |
| Median time to discontinuation (days) | 1583.0        | 917.0         | 599.0        | 304.5                         | 370.0        | 266.0          | 691.0         |
| 12-month persistence rate (% pts)     | 73.5          | 69.3          | 58.1         | 46.9                          | 50.0         | 43.0           | 62.8          |
| <b>MDV database</b>                   | <b>n=7658</b> | <b>n=1100</b> | <b>n=633</b> | <b>n=495</b>                  | <b>n=133</b> | <b>n=446</b>   | <b>n=229</b>  |
| Median time to discontinuation (days) | 764.0         | 666.5         | 532.0        | 422.0                         | 333.0        | 396.0          | 553.0         |
| 12-month persistence rate (% pts)     | 78.8          | 73.6          | 62.2         | 52.7                          | 48.1         | 52.2           | 66.4          |

$\alpha$ -GI,  $\alpha$ -glucosidase inhibitor; DPP-4i, dipeptidyl peptidase-4 inhibitor; GLP-1, glucagon-like peptide-1; JMDC, Japan Medical Data Center; MDV,

1  
2  
3  
4  
5  
6  
7  
8  
9  
10  
11  
12  
13  
14  
15  
16  
17  
18  
19  
20  
21  
22  
23  
24  
25  
26  
27  
28  
29  
30  
31  
32  
33  
34  
35  
36  
37  
38  
39  
40  
41  
42  
43  
44  
45  
46  
47

---

Medical Data Vision; PT, previously treated; pts, patients; SGLT2i , sodium-glucose cotransporter-2 inhibitor; TZD, thiazolidinedione; UT, untreated.

---

For peer review only

## Figure legends

### Fig 1 Patient disposition.

JMDC, Japan Medical Data Center; MDV, Medical Data Vision; T2DM, type 2 diabetes mellitus.

### Fig 2 Antidiabetic drug classes prescribed at the index date in (a) UT patients; and (b) PT patients in the JMDC and MDV databases.

$\alpha$ -GI,  $\alpha$ -glucosidase inhibitor; BG, biguanide; DPP-4i, dipeptidyl peptidase-4 inhibitor; GLP-1, glucagon-like peptide-1; JMDC, Japan Medical Data Center; MDV, Medical Data Vision; PT, previously treated; pts, patients; SGLT2i, sodium-glucose cotransporter-2; SU, sulfonylurea; TZD, thiazolidinedione; UT, untreated.

### Fig 3 Kaplan-Meier survival distribution of median time to treatment discontinuation according to index antidiabetic drug class; (a) UT patients; JMDC database; (b) UT patients, MDV database; (c) PT patients, JMDC database; (d) PT patients, MDV database.

$\alpha$ -GI,  $\alpha$ -glucosidase inhibitor; BG, biguanide; DPP-4i, dipeptidyl peptidase-4 inhibitor; JMDC, Japan Medical Data Center; MDV, Medical Data Vision; PT, previously treated; SGLT2i, sodium-glucose cotransporter-2 inhibitor; SU, sulfonylurea; TZD, thiazolidinedione; UT, untreated.

### Fig 4 12-month adherence to index antidiabetic drug classes in (a) untreated (UT) patients and (b) previously treated (PT) patients in the JMDC and MDV databases.

DPP-4i, dipeptidyl peptidase-4 inhibitor; GLP-1, glucagon-like peptide-1; JMDC, Japan Medical Data Center; MDV, Medical Data Vision; PT, previously treated; pts, patients; SGLT2i, sodium-glucose cotransporter-2; TZD, thiazolidinedione; UT, untreated.

1  
2  
3  
4  
5  
6  
7 **Fig 5** 12-month persistence rates with the five most frequent index antidiabetic drug  
8 combinations in PT patients in the JMDC and MDV databases.

9  
10  $\alpha$ -GI,  $\alpha$ -glucosidase inhibitor; BG, biguanide; DPP-4i, dipeptidyl peptidase-4 inhibitor;  
11 JMDC, Japan Medical Data Center; MDV, Medical Data Vision; PT, previously treated; SU,  
12 sulfonylurea.  
13  
14  
15

16  
17  
18  
19 **Fig 6** Adherence rates for the five most frequent index antidiabetic drug combinations in PT  
20 patients in the JMDC and MDV databases.

21  
22  $\alpha$ -GI,  $\alpha$ -glucosidase inhibitor; BG, biguanide; DPP-4i, dipeptidyl peptidase-4 inhibitor;  
23 JMDC, Japan Medical Data Center; MDV, Medical Data Vision; PT, previously treated; SU,  
24 sulfonylurea.  
25  
26  
27  
28  
29  
30  
31  
32  
33  
34  
35  
36  
37  
38  
39  
40  
41  
42  
43  
44  
45  
46  
47  
48  
49  
50  
51  
52  
53  
54  
55  
56  
57  
58  
59  
60

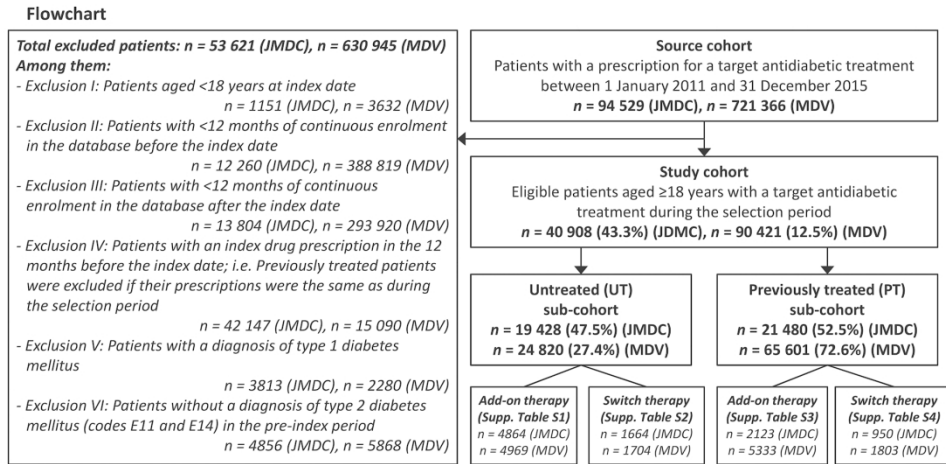

Figure 1

173x90mm (300 x 300 DPI)



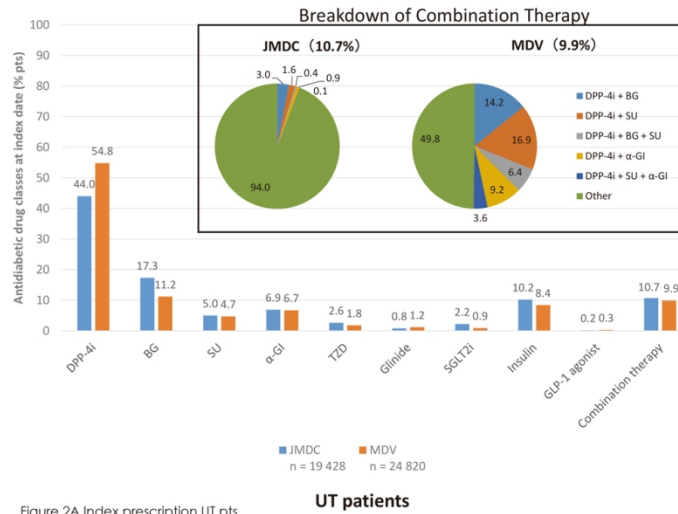

Figure 2A Index prescription UT pts

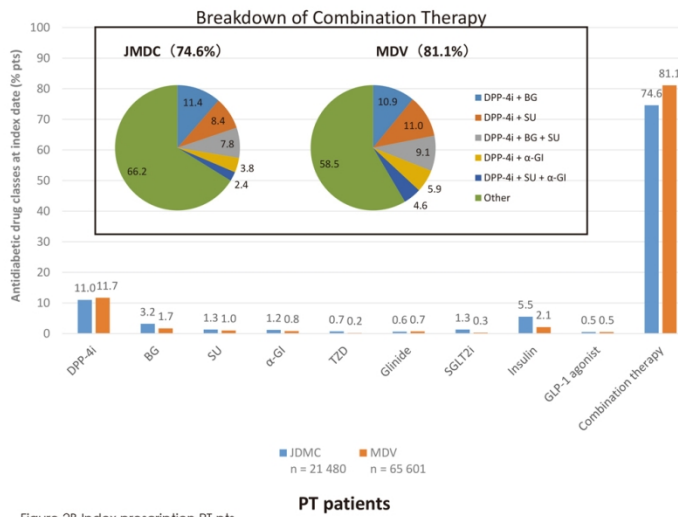

Figure 2B Index prescription PT pts

90x148mm (300 x 300 DPI)

1  
2  
3  
4  
5  
6  
7  
8  
9  
10  
11  
12  
13  
14  
15  
16  
17  
18  
19  
20  
21  
22  
23  
24  
25  
26  
27  
28  
29  
30  
31  
32  
33  
34  
35  
36  
37  
38  
39  
40  
41  
42  
43  
44  
45  
46  
47  
48  
49  
50  
51  
52  
53  
54  
55  
56  
57  
58  
59  
60



Figure 3A Survival analysis UT\_JMDC

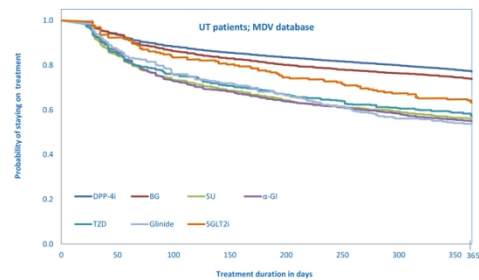

Figure 3B Survival analysis UT\_MDV



Figure 3C Survival analysis PT\_JMDC

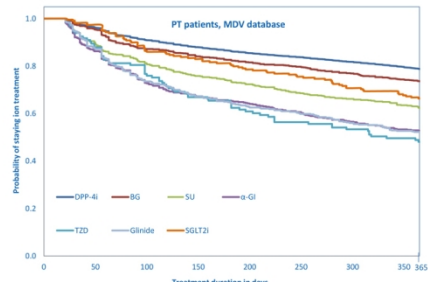

Figure 3D Survival analysis PT\_MDV

135x90mm (300 x 300 DPI)

1  
2  
3  
4  
5  
6  
7  
8  
9  
10  
11  
12  
13  
14  
15  
16  
17  
18  
19  
20  
21  
22  
23  
24  
25  
26  
27  
28  
29  
30  
31  
32  
33  
34  
35  
36  
37  
38  
39  
40  
41  
42  
43  
44  
45  
46  
47  
48  
49  
50  
51  
52  
53  
54  
55  
56  
57  
58  
59  
60

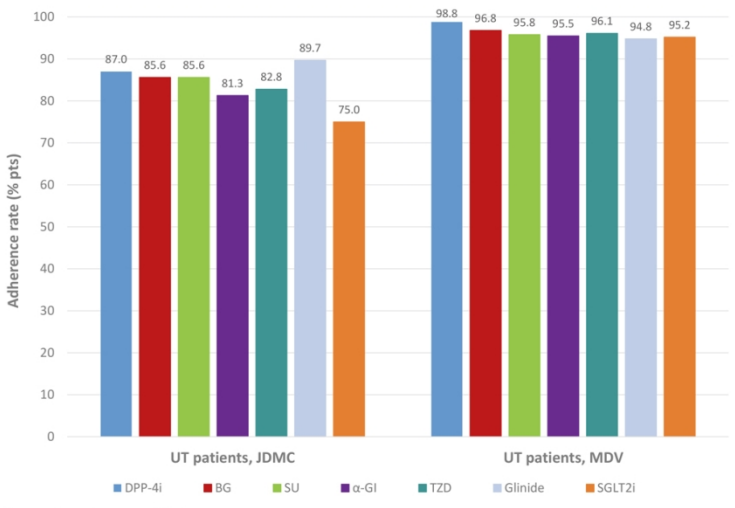

Figure 4A Adherence UT pts

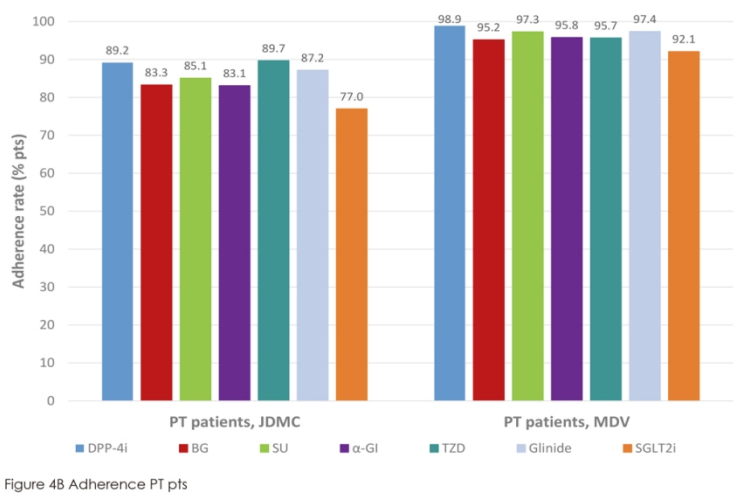

Figure 4B Adherence PT pts

90x140mm (300 x 300 DPI)



Figure 5

121x90mm (300 x 300 DPI)

1  
2  
3  
4  
5  
6  
7  
8  
9  
10  
11  
12  
13  
14  
15  
16  
17  
18  
19  
20  
21  
22  
23  
24  
25  
26  
27  
28  
29  
30  
31  
32  
33  
34  
35  
36  
37  
38  
39  
40  
41  
42  
43  
44  
45  
46  
47  
48  
49  
50  
51  
52  
53  
54  
55  
56  
57  
58  
59  
60

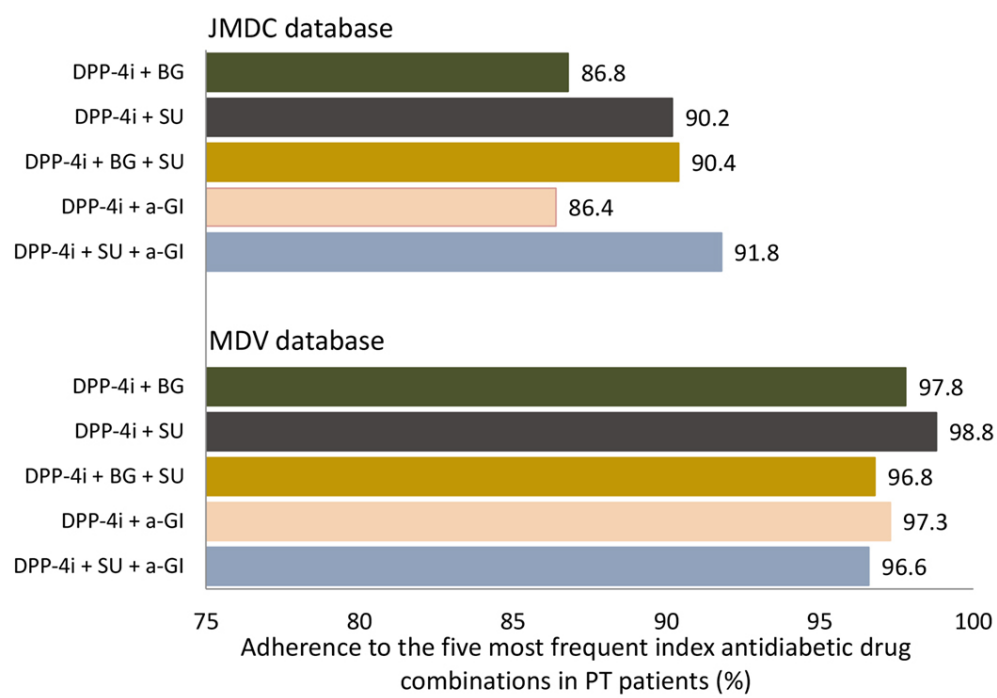

90x90mm (300 x 300 DPI)

**Supplementary table 1 Factors associated with non-persistence with the index antidiabetic drug class in untreated patients**

| Characteristics                                           | <i>JMDC database</i> |                        |                                           | <i>MDV database</i> |                        |                                           |
|-----------------------------------------------------------|----------------------|------------------------|-------------------------------------------|---------------------|------------------------|-------------------------------------------|
|                                                           | N                    | Not persistent (% pts) | Adjusted odds ratio (95% CI) <sup>a</sup> | N                   | Not persistent (% pts) | Adjusted odds ratio (95% CI) <sup>a</sup> |
| <b>Age at index date (years):</b>                         |                      |                        |                                           |                     |                        |                                           |
| 18–34                                                     | 659                  | 66.9                   | 1.00                                      | 205                 | 38.0                   | 1.00                                      |
| 35–44                                                     | 2734                 | 53.1                   | 1.64 (1.37, 1.97)*                        | 791                 | 29.5                   | 1.34 (0.96, 1.86)                         |
| 45–54                                                     | 6356                 | 41.3                   | 2.45 (2.06, 2.92)*                        | 2016                | 26.7                   | 1.48 (1.09, 2.02)*                        |
| 55–64                                                     | 5891                 | 34.8                   | 3.04 (2.55, 3.62)*                        | 4872                | 26.3                   | 1.55 (1.15, 2.09)*                        |
| 65–74                                                     | 1777                 | 31.5                   | 3.31 (2.72, 4.03)*                        | 7880                | 29.3                   | 1.39 (1.03, 1.87)*                        |
| ≥ 75                                                      | 34                   | 35.3                   | 2.52 (1.21, 5.25)*                        | 6602                | 33.8                   | 1.22 (0.90, 1.64)                         |
| <b>Number of medications:</b>                             |                      |                        |                                           |                     |                        |                                           |
| 0                                                         | 7585                 | 46.1                   | 1.00                                      | 2957                | 34.2                   | 1.00                                      |
| 1–3                                                       | 6980                 | 37.9                   | 1.21 (1.13, 1.30)*                        | 10,907              | 26.7                   | 1.38 (1.26, 1.51)*                        |
| 4–5                                                       | 1594                 | 33.4                   | 1.30 (1.15, 1.46)*                        | 5707                | 29.1                   | 1.31 (1.18, 1.45)*                        |
| 6–8                                                       | 883                  | 35.2                   | 1.23 (1.05, 1.43)*                        | 2528                | 37.9                   | 1.04 (0.92, 1.17)                         |
| > 8                                                       | 409                  | 38.4                   | 1.11 (0.89, 1.37)*                        | 267                 | 47.6                   | 0.73 (0.56, 0.95)*                        |
| <b>Hypertension:</b>                                      |                      |                        |                                           |                     |                        |                                           |
| No                                                        | 9053                 | 47.3                   | 1.00                                      | 6534                | 32.8                   | 1.00                                      |
| Yes                                                       | 8398                 | 34.0                   | 1.43 (1.33, 1.52)*                        | 15,832              | 28.6                   | 1.17 (1.09, 1.25)*                        |
| <b>Hyperlipidaemia:</b>                                   |                      |                        |                                           |                     |                        |                                           |
| No                                                        | 10,335               | 43.2                   | 1.00                                      | 8535                | 35.3                   | 1.00                                      |
| Yes                                                       | 7116                 | 37.7                   | 1.12 (1.05, 1.20)*                        | 13,831              | 26.4                   | 1.40 (1.31, 1.49)*                        |
| <b>Number of antidiabetic drug classes at index date:</b> |                      |                        |                                           |                     |                        |                                           |
| 1                                                         | 15,368               | 39.1                   | 1.00                                      | 20,180              | 27.2                   | 1.00                                      |
| 2                                                         | 1707                 | 52.7                   | 0.62 (0.56, 0.69)*                        | 1594                | 51.8                   | 0.37 (0.33, 0.41)*                        |

|     |     |      |                    |     |      |                    |
|-----|-----|------|--------------------|-----|------|--------------------|
| 3   | 299 | 60.2 | 0.44 (0.35, 0.56)* | 489 | 59.5 | 0.27 (0.22, 0.32)* |
| ≥ 4 | 77  | 68.8 | 0.31 (0.19, 0.50)* | 103 | 59.2 | 0.25 (0.16, 0.37)* |

<sup>a</sup> Adjusted for age, gender, multiple medications at index date, comorbidities at baseline, and number of antidiabetic drug classes at index date.

\*  $p < 0.05$ .

CI, confidence interval; JMDC, Japan Medical Data Center; MDV, Medical Data Vision; pts, patients.

For peer review only

**Supplementary table 2 Factors associated with non-adherence with the index antidiabetic drug class in untreated patients**

| Characteristics                                           | <i>JMDC database</i> |                      |                                           | <i>MDV database</i> |                      |                                           |
|-----------------------------------------------------------|----------------------|----------------------|-------------------------------------------|---------------------|----------------------|-------------------------------------------|
|                                                           | N                    | Not adherent (% pts) | Adjusted odds ratio (95% CI) <sup>a</sup> | N                   | Not adherent (% pts) | Adjusted odds ratio (95% CI) <sup>a</sup> |
| <b>Age at index date (years):</b>                         |                      |                      |                                           |                     |                      |                                           |
| 18–34                                                     | 599                  | 16.7                 | 1.00                                      | 190                 | 7.4                  | 1.00                                      |
| 35–44                                                     | 2571                 | 14.0                 | 1.23 (0.97, 1.57)                         | 727                 | 4.8                  | 1.40 (0.73, 2.69)                         |
| 45–54                                                     | 6056                 | 11.4                 | 1.54 (1.22, 1.94)*                        | 1893                | 2.1                  | 3.06 (1.61, 5.81)*                        |
| 55–64                                                     | 5638                 | 8.8                  | 2.05 (1.61, 2.61)*                        | 4555                | 2.0                  | 3.18 (1.75, 5.80)*                        |
| 65–74                                                     | 1694                 | 4.6                  | 3.83 (2.78, 5.27)*                        | 7341                | 2.0                  | 3.30 (1.83, 5.95)*                        |
| ≥ 75                                                      | 32                   | 6.3                  | 2.39 (0.63, 9.02)                         | 6225                | 2.7                  | 2.67 (1.47, 4.86)*                        |
| <b>Number of medications:</b>                             |                      |                      |                                           |                     |                      |                                           |
| 0                                                         | 7186                 | 10.0                 | 1.00                                      | 2713                | 2.3                  | 1.00                                      |
| 1–3                                                       | 6661                 | 10.9                 | 0.86 (0.77, 0.97)*                        | 10,178              | 1.9                  | 1.03 (0.78, 1.39)                         |
| 4–5                                                       | 1515                 | 10.4                 | 0.82 (0.68, 0.99)*                        | 5373                | 2.4                  | 0.80 (0.58, 1.12)                         |
| 6–8                                                       | 840                  | 10.1                 | 0.83 (0.65, 1.06)                         | 2410                | 3.8                  | 0.61 (0.43, 0.87)                         |
| > 8                                                       | 388                  | 10.8                 | 0.72 (0.51, 1.00)                         | 257                 | 6.2                  | 0.38 (0.21, 0.70)                         |
| <b>Hypertension:</b>                                      |                      |                      |                                           |                     |                      |                                           |
| No                                                        | 8528                 | 11.0                 | 1.00                                      | 6060                | 2.9                  | 1.00                                      |
| Yes                                                       | 8062                 | 9.8                  | 1.05 (0.95, 1.18)                         | 14,871              | 2.2                  | 1.26 (1.03, 1.54)*                        |
| <b>Hyperlipidaemia:</b>                                   |                      |                      |                                           |                     |                      |                                           |
| No                                                        | 9800                 | 10.5                 | 1.00                                      | 7959                | 3.1                  | 1.00                                      |
| Yes                                                       | 6790                 | 10.3                 | 1.01 (0.91, 1.12)                         | 12,972              | 1.9                  | 1.52 (1.26, 1.84)*                        |
| <b>Number of antidiabetic drug classes at index date:</b> |                      |                      |                                           |                     |                      |                                           |
| 1                                                         | 14,507               | 10.5                 | 1.00                                      | 18,892              | 2.0                  | 1.00                                      |
| 2                                                         | 1707                 | 9.8                  | 1.14 (0.96, 1.35)                         | 1492                | 4.6                  | 0.50 (0.38, 0.65)*                        |
| 3                                                         | 299                  | 8.7                  | 1.36 (0.91, 2.05)                         | 452                 | 6.6                  | 0.33 (0.22, 0.49)*                        |



|   |          |    |      |                   |    |     |                    |
|---|----------|----|------|-------------------|----|-----|--------------------|
| 1 |          |    |      |                   |    |     |                    |
| 2 |          |    |      |                   |    |     |                    |
| 3 | $\geq 4$ | 77 | 11.7 | 0.92 (0.46, 1.87) | 95 | 9.5 | 0.21 (0.10, 0.42)* |

---

4 <sup>a</sup> Adjusted for age, gender, multiple medications at index date, comorbidities at baseline, and number of  
5 antidiabetic drug classes at index date.

6  
7 \*  $p < 0.05$ .

8 CI, confidence interval; JMDC, Japan Medical Data Center; MDV, Medical Data Vision; pts, patients.  
9

---

10  
11  
12  
13  
14  
15  
16  
17  
18  
19  
20  
21  
22  
23  
24  
25  
26  
27  
28  
29  
30  
31  
32  
33  
34  
35  
36  
37  
38  
39  
40  
41  
42  
43  
44  
45  
46  
47  
48  
49  
50  
51  
52  
53  
54  
55  
56  
57  
58  
59  
60

For peer review only

## STROBE (Strengthening The Reporting of OBServational Studies in Epidemiology) Checklist

A checklist of items that should be included in reports of observational studies. You must report the page number in your manuscript where you consider each of the items listed in this checklist. If you have not included this information, either revise your manuscript accordingly before submitting or note N/A.

**Note:** An Explanation and Elaboration article discusses each checklist item and gives methodological background and published examples of transparent reporting. The STROBE checklist is best used in conjunction with this article (freely available on the Web sites of PLoS Medicine at <http://www.plosmedicine.org/>, Annals of Internal Medicine at <http://www.annals.org/>, and Epidemiology at <http://www.epidem.com/>). Information on the STROBE Initiative is available at [www.strobe-statement.org](http://www.strobe-statement.org).

| Section and Item     | Item No. | Recommendation                                                                                                                                                                                                                                                                                                                                                                                                                                                                 | Reported on Page No. |
|----------------------|----------|--------------------------------------------------------------------------------------------------------------------------------------------------------------------------------------------------------------------------------------------------------------------------------------------------------------------------------------------------------------------------------------------------------------------------------------------------------------------------------|----------------------|
| Title and Abstract   | 1        | (a) Indicate the study's design with a commonly used term in the title or the abstract                                                                                                                                                                                                                                                                                                                                                                                         |                      |
|                      |          | (b) Provide in the abstract an informative and balanced summary of what was done and what was found                                                                                                                                                                                                                                                                                                                                                                            |                      |
| <b>Introduction</b>  |          |                                                                                                                                                                                                                                                                                                                                                                                                                                                                                |                      |
| Background/Rationale | 2        | Explain the scientific background and rationale for the investigation being reported                                                                                                                                                                                                                                                                                                                                                                                           |                      |
| Objectives           | 3        | State specific objectives, including any prespecified hypotheses                                                                                                                                                                                                                                                                                                                                                                                                               |                      |
| <b>Methods</b>       |          |                                                                                                                                                                                                                                                                                                                                                                                                                                                                                |                      |
| Study Design         | 4        | Present key elements of study design early in the paper                                                                                                                                                                                                                                                                                                                                                                                                                        |                      |
| Setting              | 5        | Describe the setting, locations, and relevant dates, including periods of recruitment, exposure, follow-up, and data collection                                                                                                                                                                                                                                                                                                                                                |                      |
| Participants         | 6        | (a) <i>Cohort study</i> —Give the eligibility criteria, and the sources and methods of selection of participants. Describe methods of follow-up<br><br><i>Case-control study</i> —Give the eligibility criteria, and the sources and methods of case ascertainment and control selection. Give the rationale for the choice of cases and controls<br><br><i>Cross-sectional study</i> —Give the eligibility criteria, and the sources and methods of selection of participants |                      |
|                      |          | (b) <i>Cohort study</i> —For matched studies, give matching criteria and number of exposed and unexposed<br><br><i>Case-control study</i> —For matched studies, give matching criteria and the number of controls per case                                                                                                                                                                                                                                                     |                      |
| Variables            | 7        | Clearly define all outcomes, exposures, predictors, potential confounders, and effect modifiers. Give diagnostic criteria, if applicable                                                                                                                                                                                                                                                                                                                                       |                      |

| Section and Item             | Item No. | Recommendation                                                                                                                                                                                                                                                                                            | Reported on Page No. |
|------------------------------|----------|-----------------------------------------------------------------------------------------------------------------------------------------------------------------------------------------------------------------------------------------------------------------------------------------------------------|----------------------|
| Data Sources/<br>Measurement | 8*       | For each variable of interest, give sources of data and details of methods of assessment (measurement). Describe comparability of assessment methods if there is more than one group                                                                                                                      |                      |
| Bias                         | 9        | Describe any efforts to address potential sources of bias                                                                                                                                                                                                                                                 |                      |
| Study Size                   | 10       | Explain how the study size was arrived at                                                                                                                                                                                                                                                                 |                      |
| Quantitative Variables       | 11       | Explain how quantitative variables were handled in the analyses. If applicable, describe which groupings were chosen and why                                                                                                                                                                              |                      |
| Statistical Methods          | 12       | (a) Describe all statistical methods, including those used to control for confounding                                                                                                                                                                                                                     |                      |
|                              |          | (b) Describe any methods used to examine subgroups and interactions                                                                                                                                                                                                                                       |                      |
|                              |          | (c) Explain how missing data were addressed                                                                                                                                                                                                                                                               |                      |
|                              |          | (d) <i>Cohort study</i> —If applicable, explain how loss to follow-up was addressed<br><i>Case-control study</i> —If applicable, explain how matching of cases and controls was addressed<br><i>Cross-sectional study</i> —If applicable, describe analytical methods taking account of sampling strategy |                      |
|                              |          | (e) Describe any sensitivity analyses                                                                                                                                                                                                                                                                     |                      |
| <b>Results</b>               |          |                                                                                                                                                                                                                                                                                                           |                      |
| Participants                 | 13*      | (a) Report numbers of individuals at each stage of study—eg numbers potentially eligible, examined for eligibility, confirmed eligible, included in the study, completing follow-up, and analysed                                                                                                         |                      |
|                              |          | (b) Give reasons for non-participation at each stage                                                                                                                                                                                                                                                      |                      |
|                              |          | (c) Consider use of a flow diagram                                                                                                                                                                                                                                                                        |                      |
| Descriptive Data             | 14*      | (a) Give characteristics of study participants (eg demographic, clinical, social) and information on exposures and potential confounders                                                                                                                                                                  |                      |
|                              |          | (b) Indicate number of participants with missing data for each variable of interest                                                                                                                                                                                                                       |                      |
|                              |          | (c) <i>Cohort study</i> —Summarise follow-up time (eg, average and total amount)                                                                                                                                                                                                                          |                      |
| Outcome Data                 | 15*      | <i>Cohort study</i> —Report numbers of outcome events or summary measures over time                                                                                                                                                                                                                       |                      |
|                              |          | <i>Case-control study</i> —Report numbers in each exposure category, or summary measures of exposure                                                                                                                                                                                                      |                      |
|                              |          | <i>Cross-sectional study</i> —Report numbers of outcome events or summary measures                                                                                                                                                                                                                        |                      |

| Section and Item         | Item No. | Recommendation                                                                                                                                                                                               | Reported on Page No. |
|--------------------------|----------|--------------------------------------------------------------------------------------------------------------------------------------------------------------------------------------------------------------|----------------------|
| Main Results             | 16       | (a) Give unadjusted estimates and, if applicable, confounder-adjusted estimates and their precision (eg, 95% confidence interval). Make clear which confounders were adjusted for and why they were included |                      |
|                          |          | (b) Report category boundaries when continuous variables were categorized                                                                                                                                    |                      |
|                          |          | (c) If relevant, consider translating estimates of relative risk into absolute risk for a meaningful time period                                                                                             |                      |
| Other Analyses           | 17       | Report other analyses done—eg analyses of subgroups and interactions, and sensitivity analyses                                                                                                               |                      |
| <b>Discussion</b>        |          |                                                                                                                                                                                                              |                      |
| Key Results              | 18       | Summarise key results with reference to study objectives                                                                                                                                                     |                      |
| Limitations              | 19       | Discuss limitations of the study, taking into account sources of potential bias or imprecision. Discuss both direction and magnitude of any potential bias                                                   |                      |
| Interpretation           | 20       | Give a cautious overall interpretation of results considering objectives, limitations, multiplicity of analyses, results from similar studies, and other relevant evidence                                   |                      |
| Generalisability         | 21       | Discuss the generalisability (external validity) of the study results                                                                                                                                        |                      |
| <b>Other Information</b> |          |                                                                                                                                                                                                              |                      |
| Funding                  | 22       | Give the source of funding and the role of the funders for the present study and, if applicable, for the original study on which the present article is based                                                |                      |

\*Give information separately for cases and controls in case-control studies and, if applicable, for exposed and unexposed groups in cohort and cross-sectional studies.

**Once you have completed this checklist, please save a copy and upload it as part of your submission. DO NOT include this checklist as part of the main manuscript document. It must be uploaded as a separate file.**
