# Supplementary material for: Treatment patterns, persistence and adherence rates in patients with type 2 diabetes mellitus in Japan: a claims-based cohort study
Source: PubMed Central journal article supplement — BMJ Open. 2019 Mar 1;9(3):e025806. doi: 10.1136/bmjopen-2018-025806 (PMC6429930; doi:10.1136/bmjopen-2018-025806), 2019-03-01
Supplement: bmjopen-2018-025806supp001.pdf [file bmjopen-2018-025806supp001.pdf]

**Supplementary table 1 Factors associated with non-persistence with the index antidiabetic drug class in untreated patients**

| Characteristics                                           | <i>JMDC database</i> |                        |                                           | <i>MDV database</i> |                        |                                           |
|-----------------------------------------------------------|----------------------|------------------------|-------------------------------------------|---------------------|------------------------|-------------------------------------------|
|                                                           | N                    | Not persistent (% pts) | Adjusted odds ratio (95% CI) <sup>a</sup> | N                   | Not persistent (% pts) | Adjusted odds ratio (95% CI) <sup>a</sup> |
| <b>Age at index date (years):</b>                         |                      |                        |                                           |                     |                        |                                           |
| 18–34                                                     | 659                  | 66.9                   | 1.00                                      | 205                 | 38.0                   | 1.00                                      |
| 35–44                                                     | 2734                 | 53.1                   | 1.64 (1.37, 1.97)*                        | 791                 | 29.5                   | 1.34 (0.96, 1.86)                         |
| 45–54                                                     | 6356                 | 41.3                   | 2.45 (2.06, 2.92)*                        | 2016                | 26.7                   | 1.48 (1.09, 2.02)*                        |
| 55–64                                                     | 5891                 | 34.8                   | 3.04 (2.55, 3.62)*                        | 4872                | 26.3                   | 1.55 (1.15, 2.09)*                        |
| 65–74                                                     | 1777                 | 31.5                   | 3.31 (2.72, 4.03)*                        | 7880                | 29.3                   | 1.39 (1.03, 1.87)*                        |
| ≥ 75                                                      | 34                   | 35.3                   | 2.52 (1.21, 5.25)*                        | 6602                | 33.8                   | 1.22 (0.90, 1.64)                         |
| <b>Number of medications:</b>                             |                      |                        |                                           |                     |                        |                                           |
| 0                                                         | 7585                 | 46.1                   | 1.00                                      | 2957                | 34.2                   | 1.00                                      |
| 1–3                                                       | 6980                 | 37.9                   | 1.21 (1.13, 1.30)*                        | 10,907              | 26.7                   | 1.38 (1.26, 1.51)*                        |
| 4–5                                                       | 1594                 | 33.4                   | 1.30 (1.15, 1.46)*                        | 5707                | 29.1                   | 1.31 (1.18, 1.45)*                        |
| 6–8                                                       | 883                  | 35.2                   | 1.23 (1.05, 1.43)*                        | 2528                | 37.9                   | 1.04 (0.92, 1.17)                         |
| > 8                                                       | 409                  | 38.4                   | 1.11 (0.89, 1.37)*                        | 267                 | 47.6                   | 0.73 (0.56, 0.95)*                        |
| <b>Hypertension:</b>                                      |                      |                        |                                           |                     |                        |                                           |
| No                                                        | 9053                 | 47.3                   | 1.00                                      | 6534                | 32.8                   | 1.00                                      |
| Yes                                                       | 8398                 | 34.0                   | 1.43 (1.33, 1.52)*                        | 15,832              | 28.6                   | 1.17 (1.09, 1.25)*                        |
| <b>Hyperlipidaemia:</b>                                   |                      |                        |                                           |                     |                        |                                           |
| No                                                        | 10,335               | 43.2                   | 1.00                                      | 8535                | 35.3                   | 1.00                                      |
| Yes                                                       | 7116                 | 37.7                   | 1.12 (1.05, 1.20)*                        | 13,831              | 26.4                   | 1.40 (1.31, 1.49)*                        |
| <b>Number of antidiabetic drug classes at index date:</b> |                      |                        |                                           |                     |                        |                                           |
| 1                                                         | 15,368               | 39.1                   | 1.00                                      | 20,180              | 27.2                   | 1.00                                      |
| 2                                                         | 1707                 | 52.7                   | 0.62 (0.56, 0.69)*                        | 1594                | 51.8                   | 0.37 (0.33, 0.41)*                        |

|     |     |      |                    |     |      |                    |
|-----|-----|------|--------------------|-----|------|--------------------|
| 3   | 299 | 60.2 | 0.44 (0.35, 0.56)* | 489 | 59.5 | 0.27 (0.22, 0.32)* |
| ≥ 4 | 77  | 68.8 | 0.31 (0.19, 0.50)* | 103 | 59.2 | 0.25 (0.16, 0.37)* |

<sup>a</sup> Adjusted for age, gender, multiple medications at index date, comorbidities at baseline, and number of antidiabetic drug classes at index date.

\*  $p < 0.05$ .

CI, confidence interval; JMDC, Japan Medical Data Center; MDV, Medical Data Vision; pts, patients.
