# Supplementary material for: Treatment patterns, persistence and adherence rates in patients with type 2 diabetes mellitus in Japan: a claims-based cohort study
Source: PubMed Central journal article supplement — BMJ Open. 2019 Mar 1;9(3):e025806. doi: 10.1136/bmjopen-2018-025806 (PMC6429930; doi:10.1136/bmjopen-2018-025806), 2019-03-01
Supplement: bmjopen-2018-025806supp002.pdf [file bmjopen-2018-025806supp002.pdf]

**Supplementary table 2 Factors associated with non-adherence with the index antidiabetic drug class in untreated patients**

| Characteristics                                           | <i>JMDC database</i> |                      |                                           | <i>MDV database</i> |                      |                                           |
|-----------------------------------------------------------|----------------------|----------------------|-------------------------------------------|---------------------|----------------------|-------------------------------------------|
|                                                           | N                    | Not adherent (% pts) | Adjusted odds ratio (95% CI) <sup>a</sup> | N                   | Not adherent (% pts) | Adjusted odds ratio (95% CI) <sup>a</sup> |
| <b>Age at index date (years):</b>                         |                      |                      |                                           |                     |                      |                                           |
| 18–34                                                     | 599                  | 16.7                 | 1.00                                      | 190                 | 7.4                  | 1.00                                      |
| 35–44                                                     | 2571                 | 14.0                 | 1.23 (0.97, 1.57)                         | 727                 | 4.8                  | 1.40 (0.73, 2.69)                         |
| 45–54                                                     | 6056                 | 11.4                 | 1.54 (1.22, 1.94)*                        | 1893                | 2.1                  | 3.06 (1.61, 5.81)*                        |
| 55–64                                                     | 5638                 | 8.8                  | 2.05 (1.61, 2.61)*                        | 4555                | 2.0                  | 3.18 (1.75, 5.80)*                        |
| 65–74                                                     | 1694                 | 4.6                  | 3.83 (2.78, 5.27)*                        | 7341                | 2.0                  | 3.30 (1.83, 5.95)*                        |
| ≥ 75                                                      | 32                   | 6.3                  | 2.39 (0.63, 9.02)                         | 6225                | 2.7                  | 2.67 (1.47, 4.86)*                        |
| <b>Number of medications:</b>                             |                      |                      |                                           |                     |                      |                                           |
| 0                                                         | 7186                 | 10.0                 | 1.00                                      | 2713                | 2.3                  | 1.00                                      |
| 1–3                                                       | 6661                 | 10.9                 | 0.86 (0.77, 0.97)*                        | 10,178              | 1.9                  | 1.03 (0.78, 1.39)                         |
| 4–5                                                       | 1515                 | 10.4                 | 0.82 (0.68, 0.99)*                        | 5373                | 2.4                  | 0.80 (0.58, 1.12)                         |
| 6–8                                                       | 840                  | 10.1                 | 0.83 (0.65, 1.06)                         | 2410                | 3.8                  | 0.61 (0.43, 0.87)                         |
| > 8                                                       | 388                  | 10.8                 | 0.72 (0.51, 1.00)                         | 257                 | 6.2                  | 0.38 (0.21, 0.70)                         |
| <b>Hypertension:</b>                                      |                      |                      |                                           |                     |                      |                                           |
| No                                                        | 8528                 | 11.0                 | 1.00                                      | 6060                | 2.9                  | 1.00                                      |
| Yes                                                       | 8062                 | 9.8                  | 1.05 (0.95, 1.18)                         | 14,871              | 2.2                  | 1.26 (1.03, 1.54)*                        |
| <b>Hyperlipidaemia:</b>                                   |                      |                      |                                           |                     |                      |                                           |
| No                                                        | 9800                 | 10.5                 | 1.00                                      | 7959                | 3.1                  | 1.00                                      |
| Yes                                                       | 6790                 | 10.3                 | 1.01 (0.91, 1.12)                         | 12,972              | 1.9                  | 1.52 (1.26, 1.84)*                        |
| <b>Number of antidiabetic drug classes at index date:</b> |                      |                      |                                           |                     |                      |                                           |
| 1                                                         | 14,507               | 10.5                 | 1.00                                      | 18,892              | 2.0                  | 1.00                                      |
| 2                                                         | 1707                 | 9.8                  | 1.14 (0.96, 1.35)                         | 1492                | 4.6                  | 0.50 (0.38, 0.65)*                        |
| 3                                                         | 299                  | 8.7                  | 1.36 (0.91, 2.05)                         | 452                 | 6.6                  | 0.33 (0.22, 0.49)*                        |

---

|          |    |      |                   |  |    |     |                    |
|----------|----|------|-------------------|--|----|-----|--------------------|
| $\geq 4$ | 77 | 11.7 | 0.92 (0.46, 1.87) |  | 95 | 9.5 | 0.21 (0.10, 0.42)* |
|----------|----|------|-------------------|--|----|-----|--------------------|

---

<sup>a</sup> Adjusted for age, gender, multiple medications at index date, comorbidities at baseline, and number of antidiabetic drug classes at index date.

\*  $p < 0.05$ .

CI, confidence interval; JMDC, Japan Medical Data Center; MDV, Medical Data Vision; pts, patients.

---
